# Supplementary material for: Genome-Wide Identification and Expression Profiling of Aconitase Gene Family Members Reveals Their Roles in Plant Development and Adaptation to Diverse Stress in Triticum aestivum L
Source: MDPI journal article supplement (doi:10.3390/plants11243475), 2022-12-12
Supplement: s1 [file s1]

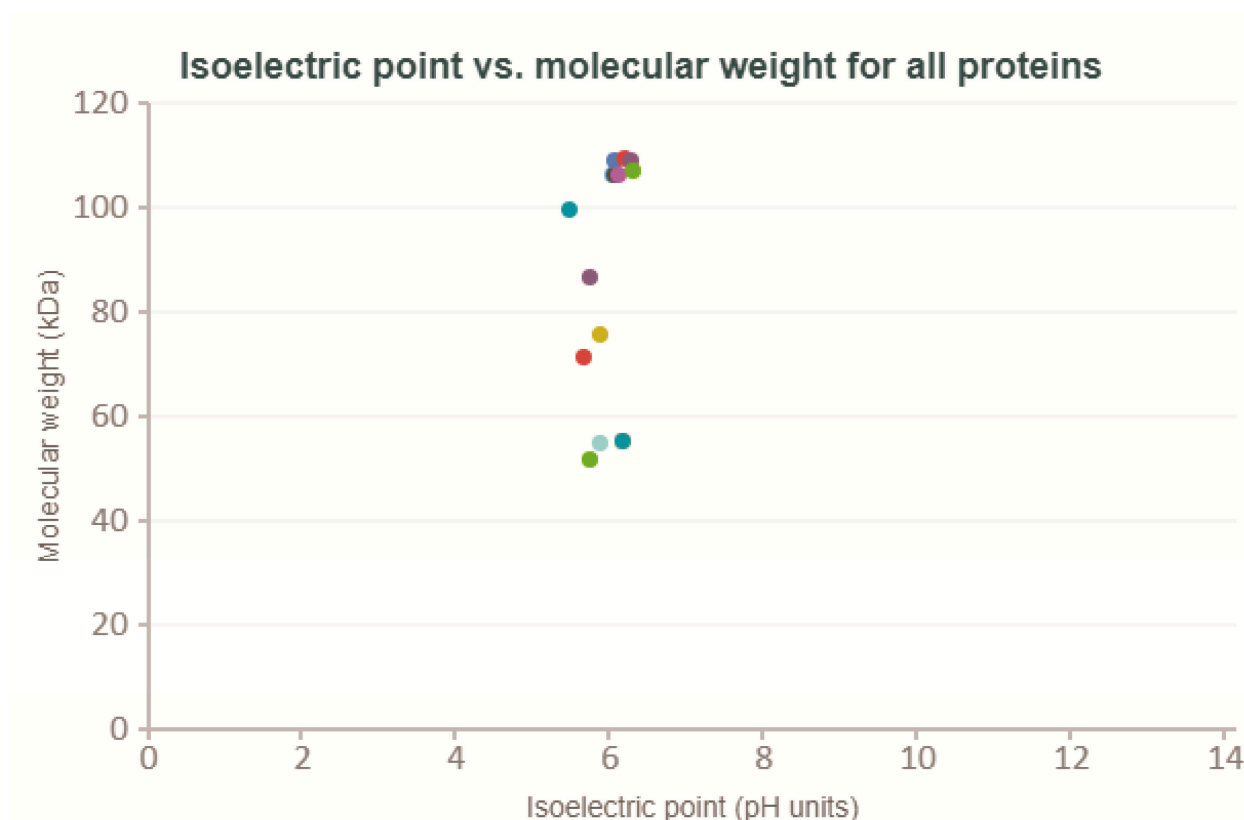

**Figure S1.** The molecular mass (kDa) and isoelectric point of plots of TaACO genes.

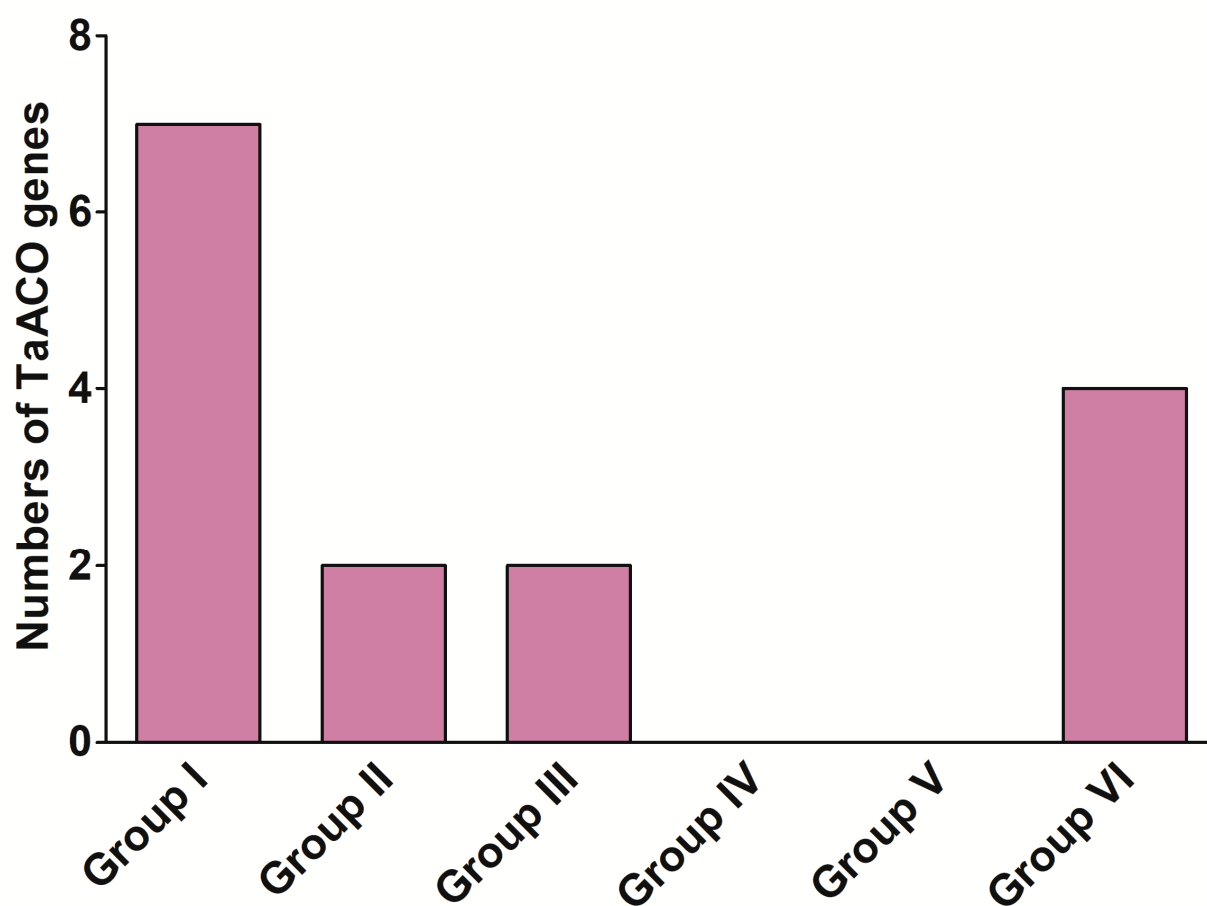

**Figure S2.** Dispersal of TaACOs in a different group of the phylogenetic tree.

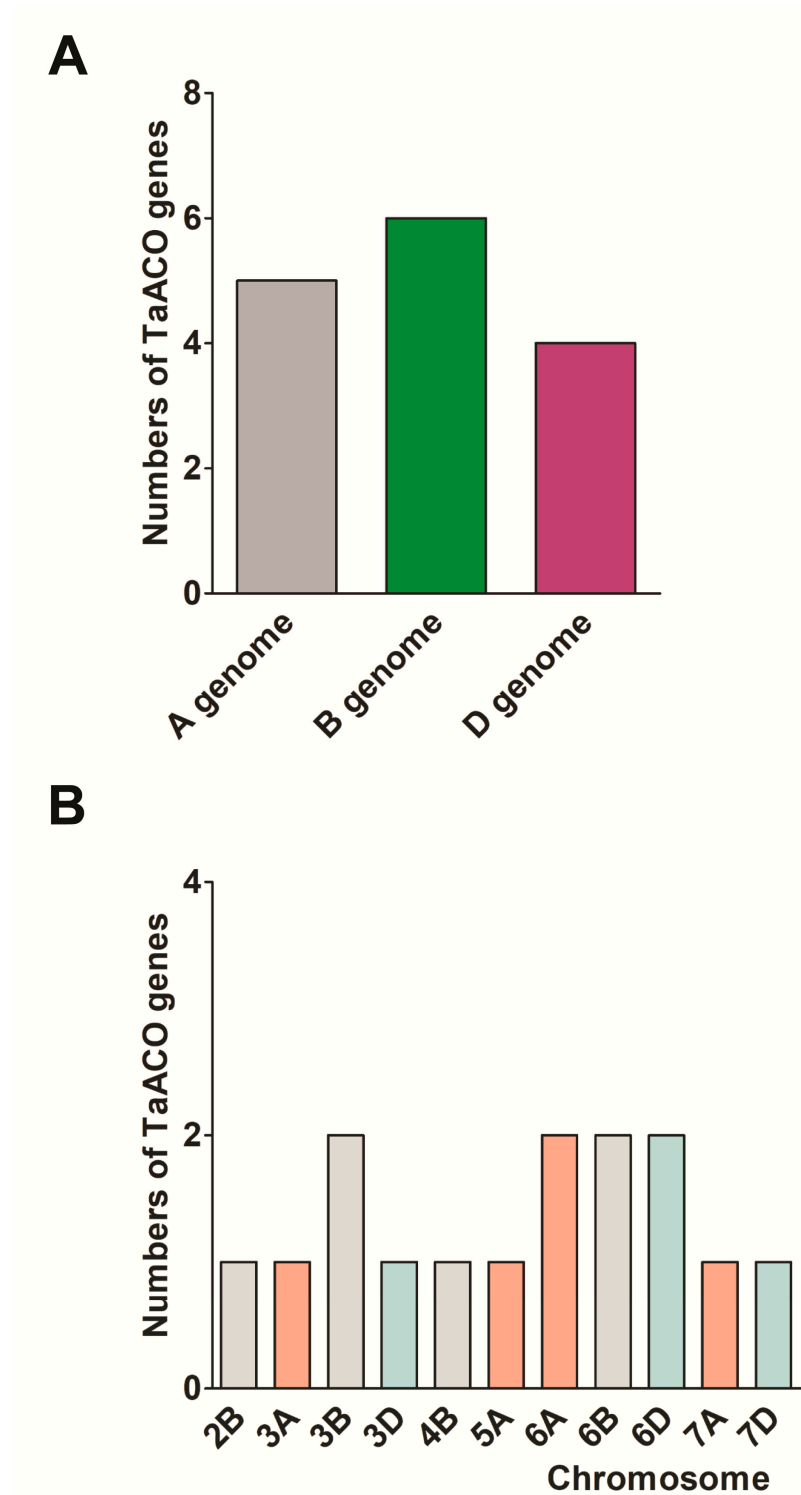

**Figure S3.** Chromosomal locations of identified ACO genes and on the three sub-genomes of (A) Dispersal of ACO genes in the A, B and D sub-genomes. (B) Dispersal of ACO genes on wheat chromosomes.

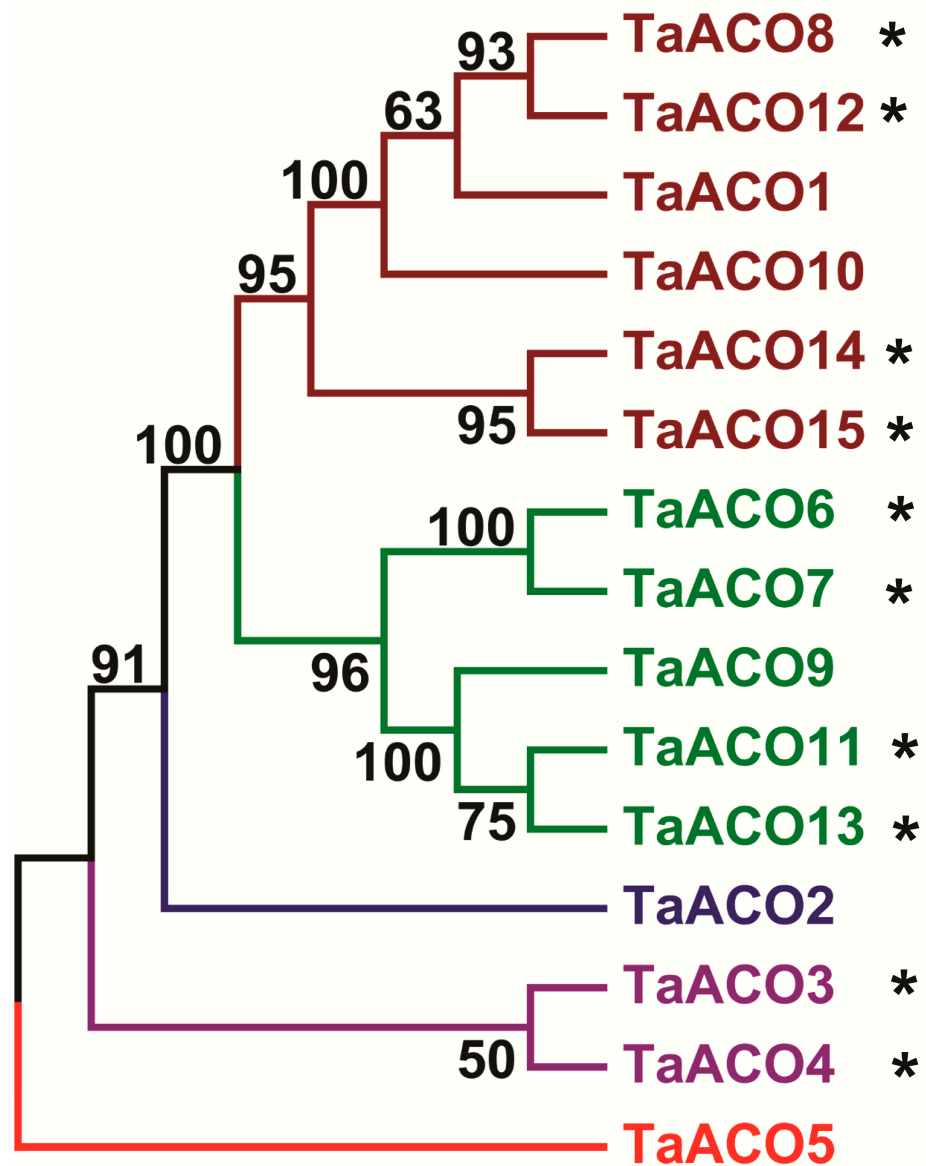

**Figure S4.** Evolutionary analysis of TaACO genes. A phylogenetic tree was produced using MEGA7 with the NJ method and 1000 bootstrap replications. A black asterisk denotes the duplicated gene pairs.

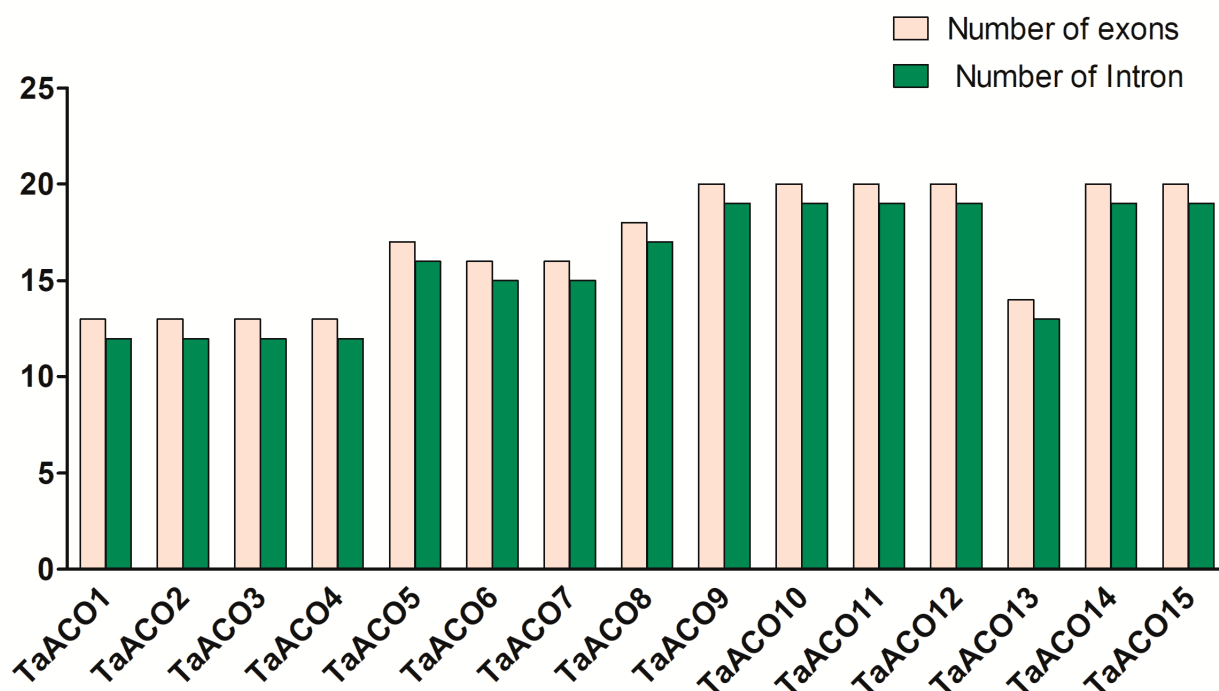

Figure S5. The different number of exons and introns in found in the TaACOs gene family.

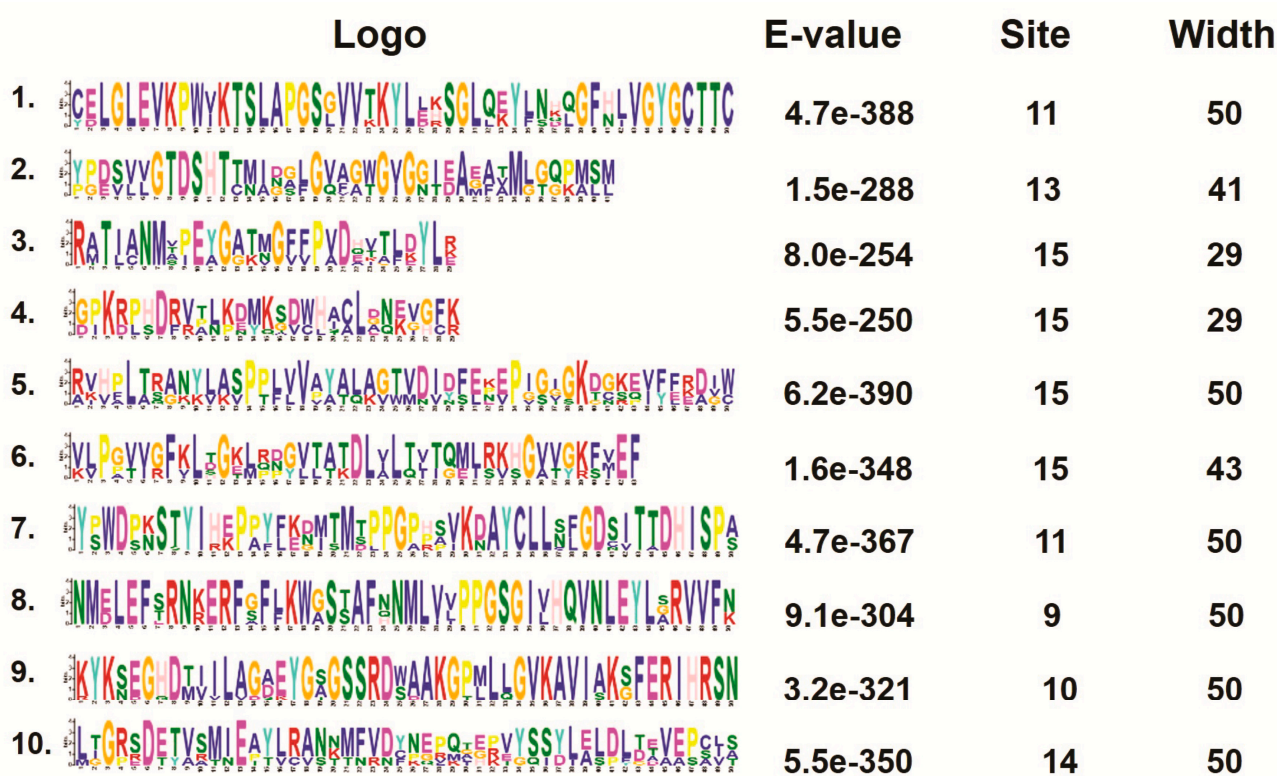

Figure S6. Sequence logo of TaACO motif and height of each mountain indicate the conservation at this position, whereas the height of the different letters represent the frequency of the corresponding amino acids.



```

      *      200      *      220      *      240
TaAC01 : -----MNYSCIIREASMRMINPFVMSRLE----- :
TaAC02 : WEKISPKLAIEIPFKEARLVIMNTGGIAVVDLAAIRVIAEIDSPKKINPLVFVDLVID :
TaAC03 : ----- :
TaAC04 : WEKISPKLAIEIPFKEARLVIMNTGGIAVVDLAAIRVIAEESIPKKINPLVFVDLVID :
TaAC05 : WEKISPKLAIEIPFKEARLVIMNTGGIAVVDLAAIRVIAEESIPKKINPLVFVDVVID :
TaAC06 : -----MTVLCLCLCAIAYIAACIFFQVFVDLVVD :
TaAC07 : WENIATKQVEIPFKEARVLIQDFTGVIAVVDLACMRDAMSKIGSPNKINPLVFVDLVVD :
TaAC08 : -----MASISAAAKATSAAFAHKKEIAAAAPQQRLS :
TaAC09 : WENISPKLAIEIPFKEARVLIQDFTGVIAVVDLAAMRDALAKIGSLANKINPLVFVDLVID :
TaAC10 : -----MASISAAAKATSAAFAHKKEIAAAVFPQQ--- :
TaAC11 : WENISPKLAIEIPFKEARVLIQDFTGVIAVVDLAAMRDALAKIGSLANKINPLVFVDLVID :
TaAC12 : -----MASISAAAKATSAAFAHKKEIAAAAPQQRLS :
TaAC13 : WENISPKLAIEIPFKEARVLIQDFTGVIAVVDLAAMRDALAKIGSLANKINPLVFVDLVID :
TaAC14 : WEKISLEQVEIPFKEARVLIQDFTGVIAVVDLAFSMRDAMLEGGNPDKINPMVFADLVID :
TaAC15 : WEKISLEQVEIPFKEARVLIQDFTGVIAVVDLASMRDAMSEGGNPDKINPMVFADLVID :

      *      260      *      280      *      300
TaAC01 : -DFWSRRTIAGRVHAVATSTGLPRA-----EASTGSVKS----- :
TaAC02 : HSVRVQVAKCADALKQNDLEFSRNKERISIFKWASSAFNNMLVLPFGSGILHQNLEYL :
TaAC03 : ----- :
TaAC04 : HSVRVQVAKCADALKQNDLEFSRNKERISIFKWASSAFNNMLVLPFGSGILHQNLEYL :
TaAC05 : HSVRVQVAKCADALKQNDLEFSRNKERISIFKWASSAFNNMLVLPFGSGILHQNLEYL :
TaAC06 : HSVQVQVARSENNAVQANNELEFSRNKERIGILKWGSTAFNNMLVLPFGSGIVHQNLEYL :
TaAC07 : HSVQVQVARSENNAVQANNELEFSRNKERIGILKWGSTAFNNMLVLPFGSGIVHQNLEYL :
TaAC08 : AGASSRRFARAGRVRAVATPTRAPRS-----EASTGSVKS----- :
TaAC09 : HSVQVQVARSSNALQSNNELEFTRNRERIGILKWGSTAFNNMLVLPFGSGIVHQNLEYL :
TaAC10 : -LASSRRFARAGRVRAVATPTRAPRS-----EASTGSVKS----- :
TaAC11 : HSVQVQVARSTNALQSNNELEFTRNRERIGILKWGSTAFNNMLVLPFGSGIVHQNLEYL :
TaAC12 : AGASSRRFARAGRVRAVATPTRAPRS-----EASTGSVKS----- :
TaAC13 : HSVQVQVARSSNALQSNNELEFTRNRERIGILKWGSTAFNNMLVLPFGSGIVHQNLEYL :
TaAC14 : HSVTANVVRSQNALQANNELEEFERNKERIALILKWSSAFNNMLIIPFGSGIVHQNLEYL :
TaAC15 : HSVTANVVRSQNALQANNELEEFERNKERIALILKWSSAFNNMLIIPFGSGIVHQNLEYL :

      *      320      *      340      *      360
TaAC01 : -----PMTTTEKILARK :
TaAC02 : SRVVIKADGVLYPDSVVGTDSTHTTMINSLGVAGWGVGGIEEMAMLGQPMSMVLPGVVGF :
TaAC03 : -----MVLPGVVGF :
TaAC04 : SRVVIKADGVLYPDSVVGTDSTHTTMINSLGVAGWGVGGIEEMAMLGQPMSMVLPGVVGF :
TaAC05 : SRVVIKADGVLYPDSVVGTDSTHTTMINSLGVAGWGVGGIEEMAMLGQPMSMVLPGVVGF :
TaAC06 : ARVVINNGGILYPDSVVGTDSTHTTMIDGLGVAGWGVGGIEEATMLGQPMSMVLPAVVGF :
TaAC07 : ARVVINNGGILYPDSVVGTDSTHTTMIDGLGVAGWGVGGIEEATMLGQPMSMVLPAVVGF :
TaAC08 : -----PMTTTEKILARA :
TaAC09 : GRVVINTDGIMYPDSVVGTDSTHTTMIDGLGVAGWGVGGIEEATMLGQPMSMVLPGVVGF :
TaAC10 : -----PMTTTEKILARA :
TaAC11 : GRVVINTDGIMYPDSVVGTDSTHTTMIDGLGVAGWGVGGIEEATMLGQPMSMVLPGVVGF :
TaAC12 : -----PMTTTEKILARA :
TaAC13 : GRVVINTDGIMYPDSVVGTDSTHTTMIDGLGVAGWGVGGIEEATMLGQPMSMVLPGVVGF :
TaAC14 : ARVVINRDGLLYPDSVLGTDSTHTTMINGLGVAGWGVGGIDEEAMLGQPMSMVLPGVVGF :
TaAC15 : -----QPMSTMVLPGVVGF :

```

|         |   | *           | 380              | *      | 400     | *      | 420         |                  |
|---------|---|-------------|------------------|--------|---------|--------|-------------|------------------|
| TaACO1  | : | SERAS       | EPGENVWVVDVLMTHD | CGP    | TIGIKKE | ----   | GEDAKWDRKVI | PDHY :           |
| TaACO2  | : | KLTGKIQDG-V | TTDIALTLTQMLRKHG | VVGKFI | EFY     | GEGVGS | IP          | PARATIANMTPEY :  |
| TaACO3  | : | KLTGKIQDG-V | TTDIALTLTQMLRKHG | VVGKFI | EFH     | GEGVGS | IP          | PARATIANMTPEY :  |
| TaACO4  | : | KLTGKIQDG-V | TTDIALTLTQMLRKHG | VVGKFI | EFH     | GEGVGS | IP          | PARATIANMTPEY :  |
| TaACO5  | : | KLTGKIQDG-V | TTDIALTLTQMLRKHG | VVGKFI | EFH     | GEGVGS | IP          | PARATIANMTPEY :  |
| TaACO6  | : | KLSGKIRNG-V | ATDIVLTVTQMLRKHG | VVGKFE | VEFY    | GGMGKE | IS          | ADRATTIANMAPEY : |
| TaACO7  | : | KLSGKIRNG-V | ATDIVLTVTQMLRKHG | VVGKFE | VEFY    | GGMGKE | IS          | ADRATTIANMAPEY : |
| TaACO8  | : | SERAS       | EPGENVWVVDVLMTHD | CGP    | TIGIKKE | ----   | GEDAKWDRKVI | PDHY :           |
| TaACO9  | : | KLSGKIRNG-V | ATDIVLTVTQMLRKHG | VVGKFE | VEFY    | GEGMK  | IS          | ADRATTIANMSPEY : |
| TaACO10 | : | SERAS       | EPGENVWVVDVLMTHD | CGP    | TIGIKKE | ----   | GEDAKWDRKVI | PDHY :           |
| TaACO11 | : | KLTGKIRNG-V | ATDIVLTVTQMLRKHG | VVGKFE | VEFY    | GEGMK  | IS          | ADRATTIANMSPEY : |
| TaACO12 | : | SERAS       | EPGENVWVVDVLMTHD | CGP    | TIGIKKE | ----   | GEDAKWDRKVI | PDHY :           |
| TaACO13 | : | KLTGKIRNG-V | ATDIVLTVTQMLRKHG | VVGKFE | VEFY    | GEGMK  | IS          | ADRATTIANMSPEY : |
| TaACO14 | : | KLHCTIRDG-V | ATDIVLTVTQMLRKHG | VVGKFE | VEFY    | GRGME  | EA          | ADRATTIANMAPEY : |
| TaACO15 | : | KLHCTIRDG-V | ATDIVLTVTQMLRKHG | VVGKFE | VEFY    | GRGME  | EA          | ADRATTIANMAPEY : |

|         |   | *       | 440              | *              | 460            | *       | 480        |                      |         |
|---------|---|---------|------------------|----------------|----------------|---------|------------|----------------------|---------|
| TaACO1  | : | -----   | ITGDE-----       | -----          | AARNVDILRD     | CAEQ    | KIKYFY     | YDIKDLSDFRANPDYKGV : |         |
| TaACO2  | : | GATMGFF | FVDQALDYLRLIGRSD | ETVSMIEAYLRANK | MFVDCN         | LP      | TGPFVYSSD  | IELDL :              |         |
| TaACO3  | : | GATMGFF | FVDQALDYLRLIGRSD | ETVSMIEAYLRANK | MFVDCN         | LP      | TGPFVYSSD  | IELDL :              |         |
| TaACO4  | : | GATMGFF | FVDQALDYLRLIGRSD | ETVSMIEAYLRANK | MFVDCN         | LP      | TGPFVYSSD  | IELDL :              |         |
| TaACO5  | : | GATMGFF | FVDQALDYLRLIGRSD | ETVSMIEAYLRANK | MFVDCN         | LP      | TGPFVYSSD  | IELDL :              |         |
| TaACO6  | : | GATMGFF | FVDAKTLDYLKL     | TGRSD          | ETVAMIEAYLRANK | MFVDYK  | VCAERVYSSY | IELDL :              |         |
| TaACO7  | : | GATMGFF | FVDAKTLDYLKL     | TGRSD          | ETVAMIEAYLRANK | MFVDYK  | VCAERVYSSY | IELDL :              |         |
| TaACO8  | : | -----   | ITSDE-----       | -----          | AARNVDILRD     | CEEQ    | KIKYFY     | YDIKDLSDFRANPDYKGV : |         |
| TaACO9  | : | GATMGFF | FVDHVTLDYLRL     | TGRSD          | ETVSMIEAYLRANK | MFVDYNE | LP         | LERVYSSY             | IALDL : |
| TaACO10 | : | -----   | ITSDE-----       | -----          | AARNVDILRD     | CEEQ    | KIKYFY     | YDIKDLSDFRANPDYKGV : |         |
| TaACO11 | : | GATMGFF | FVDHVTLDYLRL     | TGRSD          | ETVSMIEAYLRANK | MFVDYNE | LP         | AERVYSSY             | IALDL : |
| TaACO12 | : | -----   | ITSDE-----       | -----          | AARNVDILRD     | CEEQ    | KIKYFY     | YDIKDLSDFRANPDYKGV : |         |
| TaACO13 | : | GATMGFF | FVDHVTLDYLRL     | TGRSD          | ETVSMIEAYLRANK | MFVDYNE | LP         | LERVYSSY             | IALDL : |
| TaACO14 | : | GATVGF  | FVDHVTLEYLKMTG   | REDET          | VSTIEAYLRANK   | MFVDYNE | PKIEPT     | YSSY                 | IELDL : |
| TaACO15 | : | GATVGF  | FVDHVTLEYLKMTG   | REDET          | VSTIEAYLRANK   | MFVDYNE | PKIEPT     | YSSY                 | IELDL : |

|         |   | *  | 500             | *        | 520      | *          | 540     |             |            |
|---------|---|----|-----------------|----------|----------|------------|---------|-------------|------------|
| TaACO1  | : | CH | ALAQEGHCR       | GE----   | VLGTLSHT | CNAGAF     | QFATG   | IGNTDAG---- | VMGTGKAL : |
| TaACO2  | : | TT | VEESVAGPKRPHDRV | PLKEMKSD | WHACLGNE | VGFKGAVPKI | EH      | NKIVKEDI    | HQPAE :    |
| TaACO3  | : | TT | VEESVAGPKRPHDRV | PLKEMKSD | WHACLGNE | VGFKGAVPKI | QH      | NKIVKEDI    | HQPAE :    |
| TaACO4  | : | TT | VEESVAGPKRPHDRV | PLKEMKSD | WHACLGNE | VGFKGAVPKI | QH      | NKIVKEDI    | HQPAE :    |
| TaACO5  | : | TT | VEESVAGPKRPHDRV | PLKEMKSD | WHACLGNE | VGFKGAVPKI | QH      | NKIVKEDI    | HQPAE :    |
| TaACO6  | : | DE | VEECISGPKRPHDRV | TLKNQSD  | WLSCLDNK | VGFKGAVPKI | SQAKVAE | SSTR        | TPAK :     |
| TaACO7  | : | DE | VEECISGPKRPHDRV | TLKNQSD  | WLSCLDNK | VGFKGAVPKI | SQAKVAE | SSTR        | TPAK :     |
| TaACO8  | : | CH | ALAQEGHCR       | GE----   | VLGTLSHT | CNAGAF     | QFATG   | IGNTDAG---- | VMGTGKAL : |
| TaACO9  | : | DE | VEECISGPKRPHDRV | TLKNQSD  | WLSCLDNK | VGFKGAVPKI | QQ      | DKVVKEDI    | NQPAE :    |
| TaACO10 | : | CH | ALAQEGHCR       | GE----   | VLGTLSHT | CNAGAF     | QFATG   | IGNTDAG---- | VMGTGKAL : |
| TaACO11 | : | DE | VEECISGPKRPHDRV | TLKNQSD  | WLSCLDNK | VGFKGAVPKI | QQ      | DKVVKEDI    | NQPAE :    |
| TaACO12 | : | CH | ALAQEGHCR       | GE----   | VLGTLSHT | CNAGAF     | QFATG   | IGNTDAG---- | VMGTGKAL : |
| TaACO13 | : | DE | VEECISGPKRPHDRV | TLKNQSD  | WLSCLDNK | VGFKGAVPKI | QQ      | DKVVKEDI    | NQPAE :    |
| TaACO14 | : | GD | VEECISGPKRPHDRV | TLKNQSD  | WLSCLDNK | VGFKGAVPKI | IP      | DLQNRVVKEDI | HQRTAE :   |
| TaACO15 | : | GD | VEECISGPKRPHDRV | TLKNQSD  | WLSCLDNK | VGFKGAVPKI | IP      | DLQNRVVKEDI | HQRTAE :   |



```

      *          560          *          580          *          600
TaACO1 : LK----VPPTIRFVLGEMPYLLAKDLQLQIIGETISGATKSMETAGS-----IE :
TaACO2 : ITHGSVVLAAVCSSINSSNFSVMIGAGLVAKKACELGLEVKPEWVKTSIAPGSLVVTKYIE :
TaACO3 : ITHGSVVLAAVCSSINSSNFSVMIGAGLVAKKACELGLEVKPEWVKTSIAPGSLVVTKYIE :
TaACO4 : ITHGSVVLAAVCSSINSSNFSVMIGAGLVAKKACELGLEVKPEWVKTSIAPGSLVVTKYIE :
TaACO5 : ITHGSVVLAAVCSSINSSNFSVMIGAGLVAKKACELGLEVKPEWVKTSIAPGSLVVTKYIE :
TaACO6 : IKHGDVVIAAITSCINTSNENVMLGALVAKKACDLGLEVKPEWIKTSIAPGSGVVKKYID :
TaACO7 : IKHGDVVIAAITSCINTSNENVMLGALVAKKACDLGLEVKPEWIKTSIAPGSGVVKKYID :
TaACO8 : LK----VPPTIRFVLGEMPYLLAKDLQLQIIGETISGATRSMEFVGS-----IE :
TaACO9 : LKHGSVVIAAITSCINTSNFSVMLGALVAKKACELGLEVKPEWVKTSIAPGSGVVTKYIL :
TaACO10 : LK----VPPTIRFILGEMPYLLAKDLQLQIIGETISGATRSMEFVGS-----IE :
TaACO11 : LKHGSVVIAAITSCINTSNFSVMLGALVAKKACELGLEVKPEWVKTSIAPGSGVVTKYIL :
TaACO12 : LK----VPPTIRFVLGEMPYLLAKDLQLQIIGETISGATRSMEFVGS-----IE :
TaACO13 : LKHGSVVIAAITSCINTSNFSVMLGALVAKKACELGLEVKPEWVKTSIAPGSGVVTKYIL :
TaACO14 : LKHGTVVIAAITSCINTSNFTVMIASGLVAKKAYELGLEVKPEWIKTSIAPGSGVVTKYIL :
TaACO15 : LKHGTVVIAAITSCINTSNFTVMIASGLVAKKAYELGLEVKPEWIKTSIAPGSGVVTKYIL :

      *          620          *          640          *          660
TaACO1 : SLNMEFRMT-----LNMVTEAGKNGVVPADETFKY-----IEKTSVTEYEP :
TaACO2 : HSGIQEYLNHQGFHLVGYGCTTCIGNSQDIDKSLSDAIVDNDVVVVAVLSGNRNYEGR :
TaACO3 : HSGIQEYLNHQGFHLVGYGCTTCIGNSQDIDKSLSDAIVDNDVVVVAVLSGNRNYEGR :
TaACO4 : HSGIQEYLNHQGFHLVGYGCTTCIGNSQDIDKSLSDAIVDNDVVVVAVLSGNRNYEGR :
TaACO5 : HSGIQEYLNHQGFHLVGYGCTTCIGNSQDIDKSLSDAIVDNDVVVVAVLSGNRNYEGR :
TaACO6 : KSGIQKYLNLQLGHNIVGYGCTTCIGNSQDIDESVAAAITDNDVVAAAVLSGNRNFEGR :
TaACO7 : KSGIQKYLNLQLGHNIVGYGCTTCIGNSQDIDESVAAAITDNDVVAAAVLSGNRNFEGR :
TaACO8 : SLTMEFRMT-----LNMVTEAGKNGVVPADETFKY-----IEKTLVTEYEP :
TaACO9 : KSGIQEYFNKQGFHLVGYGCTTCIGNSQEHESVSAAITENDVVAAAVLSGNRNFEGR :
TaACO10 : SLTMEFRMT-----LNMVTEAGKNGVVPADETFKY-----IEKTSVTEYEP :
TaACO11 : KSGIQEYFNKQGFHLVGYGCTTCIGNSQEHESVSAAITENDVVAAAVLSGNRNFEGR :
TaACO12 : SLTMEFRMT-----LNMVTEAGKNGVVPADETFKY-----IEKTSVTEYEP :
TaACO13 : KSGIQEYFNKQGFHLVGYGCTTCIGNSQEHESVSAAITENDVVAAAVLSGNRNFEGR :
TaACO14 : RSGILKYLSDLGHNIVGYGCTTCIGNSQDIDQIVADEITENDIIAAVAVLSGNRNFEGR :
TaACO15 : RSGILKYLSDLGHNIVGYGCTTCIGNSQDIDQIVADEITENDIIAAVAVLSGNRNFEGR :

      *          680          *          700          *          720
TaACO1 : VYSDAQIRYSDYRFDIS-KIEPVAKPHSPDNRALAECIDVKIDRVYIGCTGGKTED :
TaACO2 : VHPLTRANYLASPPLVVAYALAGTVDIDFNEPIGIGKDGKEVYFKDVWPTNEEIEQVIK :
TaACO3 : VHPLTRANYLASPPFVAVAYALAGTVDIDFNEPIGIGKDGKEVYFKDVWPTNEEIEQVIK :
TaACO4 : VHPLTRANYLASPPLVVAYALAGTVDIDFNEPIGIGKDGKEVYFKDVWPTNEEIEQVIK :
TaACO5 : VHPLTRANYLASPPLVVAYALAGTVDIDFNEPIGIGKDGKEVYFKDVWPTNEEIEQVIK :
TaACO6 : VHPLTRANYLASPPLVVAYALAGTVNIDFKEFVGISKDGKEVFFRDIMPTTEIAEVVK :
TaACO7 : VHPLTRANYLASPPLVVAYALAGTVNIDFKEFVGISKDGKEVFFRDIMPTTEIAEVVK :
TaACO8 : VYSDAQIRYSDYRFDIS-KIEPVAKPHSPDNRALAECIDVKIDRVYIGCTGGKTED :
TaACO9 : VHPLTRANYLASPPLVVAYALAGTVDIDFKEPIGVGKDGKEVFFRDIMPTTEIAEVVQ :
TaACO10 : VYSDAQIRYSDYRFDIS-KIEPVAKPHSPDNRALAECIDVKIDRVYIGCTGGKTED :
TaACO11 : VHPLTRANYLASPPLVVAYALAGTVDIDFKEPIGVGKDGKEVFFRDIMPTTEIAEVVQ :
TaACO12 : VYSDAQIRYSDYRFDIS-KIEPVAKPHSPDNRALAECIDVKIDRVYIGCTGGKTED :
TaACO13 : VHPLTRANYLASPPLVVAYALAGTVDIDFKEPIGVGKDGKEVFFRDIMPTTEIAEVVQ :
TaACO14 : IHPLTRANYLASPPLVVAYALAGTVDINFEEPIGTGNGNIPFLRDIWPSSEVSEIVH :
TaACO15 : IHPLTRANYLASPPLVVAYALAGTVDINFEEPIGTGNGNIPFLRDIWPSSEVSEIVH :

```

```

      *           740           *           760           *           780
TaACO1 : FIAAAKVELASGKKKVP-----TFLVEAT-----QKVMMDVYSIPVPGS-- :
TaACO2 : SNVLEKMEVDTYDSITEGNDANNKLVVPKEFLYPWDPKSTYIHKAYLENIITMTPPGPS :
TaACO3 : SNVLEKMEVDTYGSITEGNDANNLVVPKEFLYPWDPKSTYIHKAYLENIITMTPPGPS :
TaACO4 : SNVLEKMEVDTYGSITEGNDANNLVVPKEFLYPWDPKSTYIHKAYLENIITMTPPGPS :
TaACO5 : SNVLEKMEVDTYGSITEGNDANNLVVPKEFLYPWDPKSTYIHKAYLENIITMTPPGPS :
TaACO6 : ASVLEDMEKGTYEAITKGNPMWNELPVSASTLYPWDPKSTYIHEEPYFKDMTMTPPGARP :
TaACO7 : ASVLEDMEKGTYEAITKGNPMWNELPVSASTLYPWDPKSTYIHEEPYFKDMTMTPPGARP :
TaACO8 : FIAAAKVELASGKKKVP-----TFLVEAT-----QKVMMDVYSIPVPGS-- :
TaACO9 : SSVLEDMEKSTYEAITKGNPMWNQLVPPEASLYSWDSNSTYIHEEPYFKDMTMTSPPGHA :
TaACO10 : FIAAAKVELASGQKVKVP-----TFLVEAT-----QKVMMDVYSIPVPGS-- :
TaACO11 : SSVLEDMEKSTYEAITKGNPMWNQLVPPEASLYSWDSNSTYIHEEPYFKDMTMTSPPGHA :
TaACO12 : FIAAAKVELASGKKKVP-----TFLVEAT-----QKVMMDVYSIPVPGS-- :
TaACO13 : SSVLEDMEKSTYEAITKGNPMWNELPVPPEASLYSWDSNSTYIHEEPYFKDMTMTSPPGHA :
TaACO14 : SNVIVDMEKSTYEAITKGNPMWNQLVVPETTDVYSWDPNSTYIREEPYFKGMSMDLPGEHS :
TaACO15 : SNVIVDMEKSTYEAITKGNPMWNQLVVPETADVYSWDPNSTYIREEPYFKGMSMDLPGEHS :

      *           800           *           820           *           840
TaACO1 : -----GGKTCQIFEEAGCDAIASINCG-----ACLGGPEDTYARN- :
TaACO2 : VKDAYCLISLGDSTITTDHISESGVIKGFPAAYKLLERGVKPENETTYGSRANDIEIVR :
TaACO3 : VKDAYCLISLGDSTITTDHISESGVIKGFPAAYKLLERGVKPENETTYGSRANDIEIVR :
TaACO4 : VKDAYCLISLGDSTITTDHISESGVIKGFPAAYKLLERGVKPENETTYGSRANDIEIVR :
TaACO5 : VKDAYCLISLGDSTITTDHISESGVIKGFPAAYKLLERGVKPENETTYGSRANDIEIVR :
TaACO6 : VKDAYCLINFGDSTITTDHISESGSIHDSFAAYKLLERGVKPENETTYGSRANDIEIVR :
TaACO7 : VKDAYCLINFGDSTITTDHISESGSIHDSFAAYKLLERGVKPENETTYGSRANDIEIVR :
TaACO8 : -----GGKTCQIFEEAGCDTASINCG-----ACLGGPEDTYARN- :
TaACO9 : VKDAYCLINFGDSTITTDHISESGSIHDSFAAYKLLERGVKPENETTYGSRANDIEIVR :
TaACO10 : -----GGKTCQIFEEAGCDTASINCG-----ACLGGPEDTYARN- :
TaACO11 : VKDAYCLINFGDSTITTDHISESGSIHDSFAAYKLLERGVKPENETTYGSRANDIEIVR :
TaACO12 : -----GGKTCQIFEEAGCDTASINCG-----ACLGGPEDTYARN- :
TaACO13 : VKDAYCLINFGDSTITTDHISESGSIHDSFAAYKLLERGVKPENETTYGSRANDIEIVR :
TaACO14 : IKDAYCLISFGDCVTAADHISESGSIHDSFAAYKLLERGVKPENETTYGSRANDIEIVR :
TaACO15 : IKDAYCLISFGDCVTAADHISESGSIHDSFAAYKLLERGVKPENETTYGSRANDIEIVR :

      *           860           *           880           *           900
TaACO1 : EPTVCSTTNRNFPGRMHKEGQIYLASPYTAAASALTGVVDPRDFLL----- :
TaACO2 : GAFANIRIVNKLLEGEVGPKTIVHVPTGEHYVFDAAMK-YKSEGHDMVILAGDEYAGSS :
TaACO3 : GAFANIRIVNKLLEGEVGPKTIVHVPTGEHYVFDAAMK-YKSEGHDMVILAGDEYAGSS :
TaACO4 : GAFANIRIVNKLLEGEVGPKTIVHVPTGEHYVFDAAMK-YKSEGHDMVILAGDEYAGSS :
TaACO5 : GAFANIRIVNKLLEGEVGPKTIVHVPTGEHYVFDAAMK-YKSEGHDMVILAGDEYAGSS :
TaACO6 : GTFANIRIVNKLLEGEVGPKTIVHVPTGEHYVFDAAMK-YKSEGHDMVILAGDEYAGSS :
TaACO7 : GTFANIRIVNKLLEGEVGPKTIVHVPTGEHYVFDAAMK-YKSEGHDMVILAGDEYAGSS :
TaACO8 : EPTVCSTTNRNFPGRMHKEGQIYLASPYTAAASALTGVVDPRDFLS----- :
TaACO9 : GTFANIRIVNKLLEGEVGPKTIVHVPTGEHYVFDAAMK-YKSEGHDMVILAGDEYAGSS :
TaACO10 : EPTVCSTTNRNFPGRMHKEGQIYLASPYTAAASALTGVVDPRDFLS----- :
TaACO11 : GTFANIRIVNKLLEGEVGPKTIVHVPTGEHYVFDAAMK-YKSEGHDMVILAGDEYAGSS :
TaACO12 : EPTVCSTTNRNFPGRMHKEGQIYLASPYTAAASALTGVVDPRDFLS----- :
TaACO13 : GTFANIRIVNKLLEGEVGPKTIVHVPTGEHYVFDAAMK-YKSEGHDMVILAGDEYAGSS :
TaACO14 : GTFANIRIVNKLLEGEVGPKTIVHVPTGEHYVFDAAMK-YKSEGHDMVILAGDEYAGSS :
TaACO15 : GTFANIRIVNKLLEGEVGPKTIVHVPTGEHYVFDAAMK-YKSEGHDMVILAGDEYAGSS :

```



|         |   | *     | 920                                                                                                                                                                           | *                                                                                                                                                                   | 940                                                                                                                                                     | *                                                                                                                                             | 960                                                                                                                                           |       |       |       |      |     |      |     |      |     |      |      |      |     |      |    |       |   |
|---------|---|-------|-------------------------------------------------------------------------------------------------------------------------------------------------------------------------------|---------------------------------------------------------------------------------------------------------------------------------------------------------------------|---------------------------------------------------------------------------------------------------------------------------------------------------------|-----------------------------------------------------------------------------------------------------------------------------------------------|-----------------------------------------------------------------------------------------------------------------------------------------------|-------|-------|-------|------|-----|------|-----|------|-----|------|------|------|-----|------|----|-------|---|
| TaACO1  | : | ----- |                                                                                                                                                                               |                                                                                                                                                                     |                                                                                                                                                         |                                                                                                                                               |                                                                                                                                               | :     |       |       |      |     |      |     |      |     |      |      |      |     |      |    |       |   |
| TaACO2  | : | RS    | SAAGP                                                                                                                                                                         | LLGVKAVIA                                                                                                                                                           | NG                                                                                                                                                      | FERI                                                                                                                                          | HRSNI                                                                                                                                         | VGMGI | IPLRF | AG    | EDAD | SI  | NLSG | HER | FT   | IDL | :    |      |      |     |      |    |       |   |
| TaACO3  | : | RS    | SAAGP                                                                                                                                                                         | LLGVKAVIA                                                                                                                                                           | NG                                                                                                                                                      | FERI                                                                                                                                          | HRSNI                                                                                                                                         | VGMGI | IPLRF | V     | GEDA | DSI | NLSG | HER | FT   | IDL | :    |      |      |     |      |    |       |   |
| TaACO4  | : | RS    | SAAGP                                                                                                                                                                         | LLGVKAVIA                                                                                                                                                           | NG                                                                                                                                                      | FERI                                                                                                                                          | HRSNI                                                                                                                                         | VGMGI | IPLRF | V     | GEDA | DSI | NLSG | HER | FT   | IDL | :    |      |      |     |      |    |       |   |
| TaACO5  | : | RS    | SAAGP                                                                                                                                                                         | LLGVKAVIA                                                                                                                                                           | NG                                                                                                                                                      | FERI                                                                                                                                          | HRSNI                                                                                                                                         | VGMGI | IPLRF | AG    | EDAD | SI  | NLSG | HER | C    | FT  | IDL  | :    |      |     |      |    |       |   |
| TaACO6  | : | RW    | AAKG                                                                                                                                                                          | EMIQ                                                                                                                                                                | GVKAVIA                                                                                                                                                 | KS                                                                                                                                            | FERI                                                                                                                                          | HRSNI | AG    | MGIV  | PLCF | AG  | EDAD | SI  | GLT  | GHE | RY   | TI   | QL   | :   |      |    |       |   |
| TaACO7  | : | RW    | AAKG                                                                                                                                                                          | EMIQ                                                                                                                                                                | GVKAVIA                                                                                                                                                 | KS                                                                                                                                            | FERI                                                                                                                                          | HRSNI | AG    | MGIV  | PLCF | AG  | EDAD | TL  | GLT  | GHE | RY   | TI   | QL   | :   |      |    |       |   |
| TaACO8  | : | ----- |                                                                                                                                                                               |                                                                                                                                                                     |                                                                                                                                                         |                                                                                                                                               |                                                                                                                                               |       |       |       |      |     |      |     |      |     |      |      |      | :   |      |    |       |   |
| TaACO9  | : | RW    | AAKG                                                                                                                                                                          | EMLL                                                                                                                                                                | GVKAVI                                                                                                                                                  | SS                                                                                                                                            | FERI                                                                                                                                          | HRSNI | VGMGI | IPL   | CF   | AG  | EDAD | SI  | GLT  | GHE | RY   | TI   | NI   | :   |      |    |       |   |
| TaACO10 | : | ----- |                                                                                                                                                                               |                                                                                                                                                                     |                                                                                                                                                         |                                                                                                                                               |                                                                                                                                               |       |       |       |      |     |      |     |      |     |      |      |      | :   |      |    |       |   |
| TaACO11 | : | RW    | AAKG                                                                                                                                                                          | EMLL                                                                                                                                                                | GVKAVIA                                                                                                                                                 | KS                                                                                                                                            | FERI                                                                                                                                          | HRSNI | VGMGI | IPM   | CF   | AG  | EDAD | SI  | GLT  | GHE | RY   | TI   | NI   | :   |      |    |       |   |
| TaACO12 | : | ----- |                                                                                                                                                                               |                                                                                                                                                                     |                                                                                                                                                         |                                                                                                                                               |                                                                                                                                               |       |       |       |      |     |      |     |      |     |      |      |      | :   |      |    |       |   |
| TaACO13 | : | RW    | AAKG                                                                                                                                                                          | EMLL                                                                                                                                                                | GVKAVI                                                                                                                                                  | SS                                                                                                                                            | FERI                                                                                                                                          | HRSNI | VGMGI | IPL   | CF   | AG  | EDAD | SI  | GLT  | GHE | RY   | TI   | NI   | :   |      |    |       |   |
| TaACO14 | : | RW    | DA                                                                                                                                                                            | KGT                                                                                                                                                                 | MLL                                                                                                                                                     | GVKAVIA                                                                                                                                       | KS                                                                                                                                            | FERI  | HRSNI | VGMG  | VIPL | CF  | SS   | GEI | MDSI | GLT | G    | Q    | Q    | Y   | TI   | HL | :     |   |
| TaACO15 | : | RW    | DA                                                                                                                                                                            | KRT                                                                                                                                                                 | MLL                                                                                                                                                     | GVKAVIA                                                                                                                                       | KS                                                                                                                                            | FERI  | H     | ----- |      |     |      |     |      |     |      |      |      |     | :    |    |       |   |
|         |   |       | * <td>980<td>*<td>1000<td>*<td></td><td></td><td></td><td></td><td></td><td></td><td></td><td></td><td></td><td></td><td></td><td></td><td></td><td></td></td></td></td></td> | 980 <td>*<td>1000<td>*<td></td><td></td><td></td><td></td><td></td><td></td><td></td><td></td><td></td><td></td><td></td><td></td><td></td><td></td></td></td></td> | * <td>1000<td>*<td></td><td></td><td></td><td></td><td></td><td></td><td></td><td></td><td></td><td></td><td></td><td></td><td></td><td></td></td></td> | 1000 <td>*<td></td><td></td><td></td><td></td><td></td><td></td><td></td><td></td><td></td><td></td><td></td><td></td><td></td><td></td></td> | * <td></td> |       |       |       |      |     |      |     |      |     |      |      |      |     |      |    |       |   |
| TaACO1  | : | ----- |                                                                                                                                                                               |                                                                                                                                                                     |                                                                                                                                                         |                                                                                                                                               |                                                                                                                                               |       |       |       |      |     |      |     |      |     |      |      |      |     | :    |    |       |   |
| TaACO2  | : | ERK   | TEI                                                                                                                                                                           | RPGQ                                                                                                                                                                | DI                                                                                                                                                      | VTT                                                                                                                                           | KNG                                                                                                                                           | KSFT  | CT    | LC    | INT  | QVE | LEY  | FNH | GGIL | PY  | LIR  | KLA  | ---- |     | :    |    |       |   |
| TaACO3  | : | EGK   | TEI                                                                                                                                                                           | RAGQ                                                                                                                                                                | DI                                                                                                                                                      | VTT                                                                                                                                           | QNG                                                                                                                                           | KSFT  | CT    | LS    | INT  | QVE | LEY  | FNH | GGIL | PY  | LIR  | KLA  | ---- |     | :    |    |       |   |
| TaACO4  | : | EGK   | TEI                                                                                                                                                                           | RPGQ                                                                                                                                                                | DI                                                                                                                                                      | VTT                                                                                                                                           | QNG                                                                                                                                           | KSFT  | CT    | LC    | INT  | QVE | LEY  | FNH | GGIL | PY  | LIR  | KLA  | ---- |     | :    |    |       |   |
| TaACO5  | : | ERK   | TEI                                                                                                                                                                           | RPGQ                                                                                                                                                                | DI                                                                                                                                                      | VTT                                                                                                                                           | QNG                                                                                                                                           | KSFT  | CT    | LC    | INT  | QVE | LEY  | FNH | GGIL | PY  | LIR  | KLA  | ---- |     | :    |    |       |   |
| TaACO6  | : | FTD   | NEI                                                                                                                                                                           | KPGQ                                                                                                                                                                | DI                                                                                                                                                      | VTT                                                                                                                                           | DNG                                                                                                                                           | KSFT  | CT    | LR    | FD   | TE  | VE   | LA  | YYT  | H   | GGIL | PY   | VIR  | KLA | AEQ- | :  |       |   |
| TaACO7  | : | FTD   | NEI                                                                                                                                                                           | KPGQ                                                                                                                                                                | DI                                                                                                                                                      | VTT                                                                                                                                           | DNG                                                                                                                                           | KSFT  | CT    | LR    | FD   | TE  | VE   | LA  | YYT  | H   | GGIL | PY   | VIR  | KLA | AEQ- | :  |       |   |
| TaACO8  | : | ----- |                                                                                                                                                                               |                                                                                                                                                                     |                                                                                                                                                         |                                                                                                                                               |                                                                                                                                               |       |       |       |      |     |      |     |      |     |      |      |      |     | :    |    |       |   |
| TaACO9  | : | FTD   | SEI                                                                                                                                                                           | RPGQ                                                                                                                                                                | DI                                                                                                                                                      | VTT                                                                                                                                           | DND                                                                                                                                           | KSFT  | CT    | LR    | FD   | TE  | VE   | LA  | YYN  | H   | GGIL | PY   | VIR  | NMA | GAQN | :  |       |   |
| TaACO10 | : | ----- |                                                                                                                                                                               |                                                                                                                                                                     |                                                                                                                                                         |                                                                                                                                               |                                                                                                                                               |       |       |       |      |     |      |     |      |     |      |      |      |     | :    |    |       |   |
| TaACO11 | : | FTD   | SK                                                                                                                                                                            | IRPGQ                                                                                                                                                               | DI                                                                                                                                                      | VTT                                                                                                                                           | DND                                                                                                                                           | KSFT  | CT    | LR    | FD   | TE  | VE   | LA  | YYN  | H   | GGIL | PY   | VIR  | NMA | GAQN | :  |       |   |
| TaACO12 | : | ----- |                                                                                                                                                                               |                                                                                                                                                                     |                                                                                                                                                         |                                                                                                                                               |                                                                                                                                               |       |       |       |      |     |      |     |      |     |      |      |      |     | :    |    |       |   |
| TaACO13 | : | FTD   | SEI                                                                                                                                                                           | RPGQ                                                                                                                                                                | DI                                                                                                                                                      | VTT                                                                                                                                           | DND                                                                                                                                           | KSFT  | CT    | LR    | FD   | TE  | VE   | LA  | YYN  | H   | GGIL | PY   | VIR  | NMA | GAQN | :  |       |   |
| TaACO14 | : | ESS   | HE                                                                                                                                                                            | MQPGQ                                                                                                                                                               | DI                                                                                                                                                      | VTT                                                                                                                                           | STR                                                                                                                                           | KSFT  | CT    | LR    | FD   | TE  | VE   | LA  | SY   | ED  | H    | GGIL | QY   | V   | M    | K  | INSAC | : |
| TaACO15 | : | ----- |                                                                                                                                                                               |                                                                                                                                                                     |                                                                                                                                                         |                                                                                                                                               |                                                                                                                                               |       |       |       |      |     |      |     |      |     |      |      |      |     | :    |    |       |   |

**Figure S7.** Alignment of the TaACO proteins and preserved aconitase domain is indicated with red color line. Amino acid residues conserved in all proteins were shaded blue and similar amino acids were gray shaded. Dashes denotes gaps led to exploit the alignment of the homologous region.

# A

```

          *      20      *      40      *      60      *
AtAC01 : ----- :
AtAC02 : -----MYRRATSGVRSASARLSSSLSRIASSETASVSAPSAS :
AtAC03 : -----MYLTASSSASSSIIRAASSRSSLFSFRSVLSPSV :
AtAC04 : ----- :
OsAC01 : -----MPPLTSALLSRSSSTRIPAAAAAAAISNPAGAAA :
OsAC02 : ----- :
OsAC03 : -----MYKAAYSSAS--ARLSSSLRFRSLPSPAPSSSL :
OsAC04 : ----- :
GmAC01 : -----MYITTASSSASSLLRATRPKLEFFPSPSRNFASFTP :
GmAC02 : -----MASTVSSILRASRSKLSSSSSASLSRTLAR :
GmAC03 : -----MRVLSLTR---FFSSP----- :
GmAC04 : ----- :
GmAC05 : ----- :
GmAC06 : ----- :
GmAC07 : ----- :
GmAC08 : ----- :
TaAC01 : ----- :
TaAC02 : -----MASTAGLQTSHGHWENTTLTSSQSHLGRSSSFPRPPAGDFLERSPPRCR :
TaAC03 : ----- :
TaAC04 : -----MASTAGLQISHGHWENTTLTSSQSHPCSRSSSFPRPPAGDYLERSPPRCR :
TaAC05 : -----MASTAGLQTSHGHWENTTLTSSQSHLCFRYSFPRPPAGDFLECSPPRRS :
TaAC06 : ----- :
TaAC07 : -----MPPLASSLLLSRSAAGPGSARATAAAAAAISRPAA :
TaAC08 : ----- :
TaAC09 : -----MKLLPPPPAAPCCS-SDPSSHRRRLPPPPQL---- :
TaAC010 : ----- :
TaAC011 : -----MKPLPTPPASSCCSSPDYPYSHRRRLPPPPQP---- :
TaAC012 : ----- :
TaAC013 : -----MKLLPTPPAS----SDPYSHHR-LPPPPQL---- :
TaAC014 : ----- :
TaAC015 : ----- :
PpAC01 : ----- :
PpAC02 : -----MQILTYVCRSLQAQRFCPRLPHVHGLRASSTASPVGLTREGNSSFLAPPSQP :
PpAC03 : MRLSRLPLPPRLPDRSFTMPLFMYVCRSLRQHGCSSKFPLSLGHRAASSAASAGSIRSGVPSFRSTPSQP :
PpAC04 : ----- :
PpAC05 : -----MLPLLHSGSHPRRFAPPL-----SSHAPPR-----SLPHFLS--SLK :
SdAC01 : ----- :
SdAC02 : ----- :
SdAC03 : ----- :
SdAC04 : ----- :
SdAC05 : ----- :
SdAC06 : -----MLAAAWNLCLAAPIVRKDSGLSPP :
SdAC07 : -----MLAAAWNLCLAAPIVRKDSGLSPP :

```

|         | 80 | *                                                                          | 100   | *     | 120   | *     | 140                           |
|---------|----|----------------------------------------------------------------------------|-------|-------|-------|-------|-------------------------------|
| AtACO1  | :  | -----                                                                      | ----- | ----- | ----- | ----- | MASENPFERSI :                 |
| AtACO2  | :  | SLRNQTNRSKSFSSALRSFVCSASTRWSHGGSWGPASLRAQARNSTFVMEKFERKYATMASEHSYKDI :     |       |       |       |       |                               |
| AtACO3  | :  | SSTSPSSLLARRSFGTISPAFRRWSHSFHSKPSPFRETSQIRAV---SPVLDRQLQRTFSSMASEHPFKGI :  |       |       |       |       |                               |
| AtACO4  | :  | -----                                                                      | ----- | ----- | ----- | ----- | CKSSSKS :                     |
| OsACO1  | :  | SSSSPSPPPPSSRPR-----PASPFAAGLAGRIFGGRRRAARSSSSAAAVFERREFASAAAKNSYDEI :     |       |       |       |       |                               |
| OsACO2  | :  | -----                                                                      | ----- | ----- | ----- | ----- | -----                         |
| OsACO3  | :  | RLLSLRARAFSRPSRGGWAAAGGWSGRASSSPVVGCGACRAQIGAVAPAVERVHRRMAATAAAEHPPFKNI :  |       |       |       |       |                               |
| OsACO4  | :  | -----                                                                      | ----- | ----- | ----- | ----- | KAAAFHAK :                    |
| GmACO1  | :  | CTS-----SFSATARSLLCSVPRWSHRLHSA-SPLTPRPRISAV---APLVERFHREIATMANENPPFKGN :  |       |       |       |       |                               |
| GmACO2  | :  | SAPRRSPGSSSAATRSFGSAVPRWSHGVDWR-SPLGLRPQIRAA---APLIERFHRRIATSATDNPPFKGN :  |       |       |       |       |                               |
| GmACO3  | :  | -----                                                                      | ----- | ----- | ----- | ----- | -----                         |
| GmACO4  | :  | -----                                                                      | ----- | ----- | ----- | ----- | EIVKIQK :                     |
| GmACO5  | :  | -----                                                                      | ----- | ----- | ----- | ----- | SFPRIKK :                     |
| GmACO6  | :  | -----                                                                      | ----- | ----- | ----- | ----- | -----                         |
| GmACO7  | :  | -----                                                                      | ----- | ----- | ----- | ----- | -----                         |
| GmACO8  | :  | -----                                                                      | ----- | ----- | ----- | ----- | FITCKK :                      |
| TaACO1  | :  | -----                                                                      | ----- | ----- | ----- | ----- | SMRMINP :                     |
| TaACO2  | :  | RRCSHAVAAAIVVEKLGQGRSVGPSLFVPRRSRDGFLARRGRQPPAAAPCGSAVEGAGAAAPATDRFANT :   |       |       |       |       |                               |
| TaACO3  | :  | -----                                                                      | ----- | ----- | ----- | ----- | -----                         |
| TaACO4  | :  | RRCSHAVAAAIVVEKLGQRRSVGPSLFVPRRSRDGFLARRGRQPPAAAPCGSAVEGAG-AAAPATDRFAKT :  |       |       |       |       |                               |
| TaACO5  | :  | RRCSHAVAAAIVVEKLGQGRSLGPSLFVSRRSRDGFLARRGRQQLAAAPCGSAVEGAG-AAAPATDRFAKT :  |       |       |       |       |                               |
| TaACO6  | :  | -----                                                                      | ----- | ----- | ----- | ----- | -----                         |
| TaACO7  | :  | AEPAPCPSAPAPSPLHAARGGQGPRGAFASGLAGRLFGGRRRAARSSSSAAAVFERREFASAATKNSYDEI :  |       |       |       |       |                               |
| TaACO8  | :  | -----                                                                      | ----- | ----- | ----- | ----- | SAAFAHK :                     |
| TaACO9  | :  | RRAAFPP-AASRPFAGLLRAAR---VRCSSS-TSGRGRG-----SVARFQRSSMAASGTEHAYNNI :       |       |       |       |       |                               |
| TaACO10 | :  | -----                                                                      | ----- | ----- | ----- | ----- | SAAFAHK :                     |
| TaACO11 | :  | RRAAFPP-PAPRPFAGLLRAAR---ARCSPSPSATTGPA-----VERSQRSRMAASGTEHAYSNI :        |       |       |       |       |                               |
| TaACO12 | :  | -----                                                                      | ----- | ----- | ----- | ----- | SAAFAHK :                     |
| TaACO13 | :  | RRAAFPP-AASRPFAGLLRAAR---VRCSSSSAAGRGRGVSAP-----AVARFQRR-MAVSGTEHAYSNI :   |       |       |       |       |                               |
| TaACO14 | :  | -MSTSSSNSNPFSFALR-----                                                     |       |       |       |       |                               |
| TaACO15 | :  | -----                                                                      | ----- | ----- | ----- | ----- | -----                         |
| PpACO1  | :  | -----                                                                      | ----- | ----- | ----- | ----- | -----                         |
| PpACO2  | :  | RL-SSPVINSRLFRTLAAASY-PDEHRPADFSVARS-----TKSTVGLRSTIPGARMASQTASENPFSSL :   |       |       |       |       |                               |
| PpACO3  | :  | RL-SPDSAGSRLFRTIVSASYSADCECRAAVASVGRSSPRALSPTMVPTTTTTPVGSRMASQTASENPFSSL : |       |       |       |       |                               |
| PpACO4  | :  | -----                                                                      | ----- | ----- | ----- | ----- | MATTAVSVAHHPGISSALRDGASLASG : |
| PpACO5  | :  | FL-CPASFHSVTILILLSP-----PPSPLPFP-----STMASSPASKNPFSNL :                    |       |       |       |       |                               |
| SdACO1  | :  | -----MHSQELKYFSLDSF-----                                                   |       |       |       |       | FAANPYKNL :                   |
| SdACO2  | :  | -----MHSQELKYFSLDSF-----                                                   |       |       |       |       | FAANPYKNL :                   |
| SdACO3  | :  | -----                                                                      | ----- | ----- | ----- | ----- | MEG :                         |
| SdACO4  | :  | -----                                                                      | ----- | ----- | ----- | ----- | -----                         |
| SdACO5  | :  | -----                                                                      | ----- | ----- | ----- | ----- | -----                         |
| SdACO6  | :  | RLSCFHRVRSVHFRASIALRQ-----RQEIAMVSGHPFESI :                                |       |       |       |       |                               |
| SdACO7  | :  | RLSCFHRVRSVHFRASIALRQ-----RQEIAMVSGHPFESI :                                |       |       |       |       |                               |

|         | * | 160  | *                                                   | 180       | *          | 200   | *                |
|---------|---|------|-----------------------------------------------------|-----------|------------|-------|------------------|
| AtACO1  | : | LKA  | LEKPDGG-EFGNYISLPALNDPRIDKLPYSIRILLES               | SAIRN     | CDEFQVKS   | KDV   | KIDWENTSPKQVE :  |
| AtACO2  | : | LTS  | LPKPGGG-EYGKYISLPALNDPRIDKLPFSVRILLES               | SAIRN     | CNDYQVT    | KDDV  | KIDWENTSTKQVE :  |
| AtACO3  | : | FTT  | LPKPGGG-EFGKFYSLPALNDPRVDKLPYSIRILLES               | SAIRN     | CDFQVTK    | EDV   | KIDWEKTSKQVE :   |
| AtACO4  | : | DLG  | ISSFPK--SSQISIHRCQKKSISRKIVSVMAPQKD-RSPGTTG         | SVK       | TGMTMT     |       | KILARASEKSLVVP : |
| OsACO1  | : | LTG  | LAKPGGGAIEFGKYISLPALSDPRIERLPYSIRILLES              | SAIRN     | CDEFQVT    | GKDV  | KIDWENSAPKQVE :  |
| OsACO2  | : | ---  | ---                                                 | ---       | ---        | ---   | ---              |
| OsACO3  | : | LTT  | LPKPGGG-EYGKFYSLPALNDPRIDKLPYSIRILLES               | SAIRN     | CDFQVNQNDV |       | KIDWENTSPKLAE :  |
| OsACO4  | : | NEL  | AAAVAPSQQQLQRRVSGRRARSGRVRAVATPARAPRAP              | SSTG      | SVKSAMTMT  |       | KILARASERASLEP : |
| GmACO1  | : | LTS  | LPKPGGG-EFGKFYSLPSLNDPRIDRLPYSIRILLES               | SAIRN     | CDFQVK     | KEDV  | KIDWENNSTKQVE :  |
| GmACO2  | : | LTS  | LPKPGGG-EFGKFYSLPSLNDPRIDRLPYSIRILLES               | SAIRN     | CDFQVK     | KEDV  | KIDWENS SVKQVE : |
| GmACO3  | : | ---  | ---                                                 | ---       | ---        | ---   | ---              |
| GmACO4  | : | FRR  | IVSYSG-----FYCFATLISYFYVNNTTTRAGFSRADQFYASYPAGTELLT | DTT       |            |       | KYKAALGNCFEAE :  |
| GmACO5  | : | DVS  | ISAFTS-----QRCEKALPRRIIRCAVAAPQ-RQPSTTG             | SVRTAMTMT |            |       | KILARASEKVQLTP : |
| GmACO6  | : | ---  | ---                                                 | ---       | ---        | ---   | ---              |
| GmACO7  | : | ---  | ---                                                 | ---       | ---        | ---   | ---              |
| GmACO8  | : | DLG  | FAFPSP-SSIIGKRQKCKKTSSNKIVSVVSSPKNKRSPSATG          | STKIPMTAT |            |       | KILARAAEKCEVRP : |
| TaACO1  | : | FVM  | VSR-----DFWSRRTRAGRVHAVATSTGLPRAPASTG               | SVKSPMTTT |            |       | KILARKSERASLEP : |
| TaACO2  | : | LTS  | LPKPGGG-EYGKFYSLPALNDPKIDKLPYICIRILLES              | SAVRN     | YDNFQV     | TESDV | NIDWEKTSPKLAE :  |
| TaACO3  | : | ---  | ---                                                 | ---       | ---        | ---   | ---              |
| TaACO4  | : | LTN  | LPKPGGG-EYGKFYSLPALNDPKIDKLPYICIRILLES              | SAVRN     | YDNFQV     | TESDI | NIDWEKTSPKLAE :  |
| TaACO5  | : | LT   | LPKPGGG-EYGKFYSLPALNDPKIDKLPYICIRILLES              | SAVRN     | YDNFQV     | TESDV | NIDWEKTSPKLAE :  |
| TaACO6  | : | ---  | ---                                                 | ---       | ---        | ---   | ---              |
| TaACO7  | : | LTS  | LAKPGGGADFGKYISLPALADPRIDRLPYSIRILLES               | SAIRN     | CDEFQVT    | GKDV  | KIDWENSATKQVE :  |
| TaACO8  | : | KEL  | AAAPQ--QQRLSAGASSRRARAGRVRAVATPTRAPRSPASTG          | SVKSPMTTT |            |       | KILARASERASLEP : |
| TaACO9  | : | LTS  | LPKPEGG-EYGKFYSLPALNDPRIDKLPYSIRILLES               | SAIRN     | CDGFQVT    | KNDV  | KIDWENTSPKLAE :  |
| TaACO10 | : | KEL  | AAVPP--QQ----LARSRRARAGRVRAVATPTRAPRSPASTG          | SVKSPMTTT |            |       | KILARASERASLEP : |
| TaACO11 | : | LTS  | LPKPEGG-EYGKFYSLPALNDPRIDKLPYSIRILLES               | SAIRN     | CDGFQVT    | KNDV  | KIDWENTSPKLAE :  |
| TaACO12 | : | KEL  | AAAPQ--QQRLSAGASSRRARAGRVRAVATPTRAPRSPASTG          | SVKSPMTTT |            |       | KILARASERASLEP : |
| TaACO13 | : | LTS  | LPKPEGG-EYGKFYSLPALNDPRIDKLPYSIRILLES               | SAIRN     | CDGFQVT    | KNDV  | KIDWENTSPKLAE :  |
| TaACO14 | : | --GL | RDEGG-DCGSYYSIPDLGDQRIDKLPYITIRVLLES                | SAVRN     | CDEFQIT    | KEDV  | KMGWEKTSLEQVE :  |
| TaACO15 | : | ---  | ---                                                 | ---       | ---        | ---   | MGWEKTSLEQVE :   |
| PpACO1  | : | ---  | ---                                                 | ---       | ---        | ---   | ---              |
| PpACO2  | : | ITD  | LPKPDGG-SYGKFYSLVKLNDPRVDSLPLYSIRYLLEAAIRN          | CDFQVT    | KEDV       |       | KVDWEKTAPKQVE :  |
| PpACO3  | : | ITD  | LPKPDGG-SYGKFYSLVKLNDPRVDSLPLYSIRYLLEAAIRN          | CDFQVT    | KEDV       |       | KVDWEKTAPKQVE :  |
| PpACO4  | : | SGF  | YGVRS--VAAAPKTSVASAHRDMRVRAVMAVQKQERS               | PASTG     | AVKQAMTAT  |       | KILANASEKTKLAP : |
| PpACO5  | : | VTD  | LPKASGG-SYGQYYSLVKLNDRVDELPLYSIRYLLES               | SAIRN     | CDFQVLEADV |       | KLDWKVTAPKQVE :  |
| SdACO1  | : | VK   | PLEG-----HGKYISLPALNDPRVDKLPYSIKILLES               | CIRN      | CDFQVT     | KEDV  | KIDWENTAPQQVE :  |
| SdACO2  | : | VK   | PLEG-----HGKYISLPALNDPRVEKLPYSIKILLES               | CIRN      | CDFQVT     | KEDV  | KIDWENTAPQQVE :  |
| SdACO3  | : | AML  | HSSYFS--VNAREMS-----RRSSTISAVMAPPQQQRPPASTG         | AVKHAMT   | LT         |       | KILARASEKTKLVP : |
| SdACO4  | : | ---  | ---                                                 | ---       | ---        | ---   | ---              |
| SdACO5  | : | --ML | HSSYFS--VNAREMS-----RRSSTISAVMAPPQQQRAPASTG         | AVKHAMT   | LT         |       | KILARASEKTKLVP : |
| SdACO6  | : | LTS  | LSKDDGG-EYGKYISLPDLHDPRIEKLPLYSIKILLES              | SAIRN     | CDFQVT     | KDDV  | KADWVNTAPKLVE :  |
| SdACO7  | : | LTS  | LSKDDGG-EYGKYISLPDLHDPRIEKLPLYSIKILLES              | SAIRN     | CDFQVT     | KDDV  | KADWVNTAPKLVE :  |



|         | 220                | *          | 240              | *                 | 260             | *              | 280         |
|---------|--------------------|------------|------------------|-------------------|-----------------|----------------|-------------|
| AtACO1  | : IPFKPARVLLQDFTG  | PAVVD      | LACMRDAMNNLGGDSN | KINPLVPVDLVIDES   | QVDVA           | SENAVQANMEL    | :           |
| AtACO2  | : IAFKPARVILQDFTG  | PVLVD      | LASMRDAVKNLGSDPS | KINPLVPVDLVIDES   | QVDFA           | SEDAQKNLEL     | :           |
| AtACO3  | : IPFKPARVLLQDFTG  | PAVVD      | LACMRDAMNKLGSDSN | KINPLVPVDLVIDES   | QVDVA           | SENAVQANMEL    | :           |
| AtACO4  | : GDNIVWNVDLIMTHD  | CGPGA      | FGIFKREFGEK----  | AVWDPEKIVLIPDHY   | FTADK           | ANRNVDIMREH    | :           |
| OsACO1  | : IPFKPARVLLQDFTG  | PAVVD      | LACMRDAMSKLGSDEN | KINPLVPVDLVIDES   | QVDVA           | SENAVQANMEL    | :           |
| OsACO2  | :                  |            |                  |                   |                 |                | MEL :       |
| OsACO3  | : IPFKPARVLLQDFTG  | PAVVD      | LAAMRDAMAKLGSDAN | KINPLVPVDLVIDES   | QVDVA           | SPNAVQSNMEL    | :           |
| OsACO4  | : GENVVVDVLLIMTHD  | CGPGT      | IGIFKREFGED----  | AVWDREKVVLIIPDHY  | FTSDE           | ANRNVDILRDF    | :           |
| GmACO1  | : IPFKPARVLLQDFTG  | PAVVD      | LACMRDAMNKLGSDSN | KINPLVPVDLVIDES   | QVDVT           | SDNAVQANMEL    | :           |
| GmACO2  | : IPFKPARVLLQDFTG  | PAVVD      | LACMRDAMNKLGSDSN | KINPLVPVDLVIDES   | QVDVA           | SENAVQANMEL    | :           |
| GmACO3  | :                  | -----LDFTG | PAVVD            | LACVRDARNKLGSDSN  | KINPLVPVDLVIDES | QVDVA          | SEN----- :  |
| GmACO4  | : EWGPFEFCVAKHFERQ | GKSPY      | AYHAKMFRNT----   | AVWDCEKIMFIPDHY   | FPNA            | EAHAHYIVDISRKF | :           |
| GmACO5  | : GDNVWNVVDLIMTHD  | CGPGS      | IGIFKREFGDD----  | AVWDREKIVLIIPDHY  | FTSDE           | ANRNVDILRDF    | :           |
| GmACO6  | :                  |            |                  |                   |                 |                | :           |
| GmACO7  | :                  |            |                  |                   |                 |                | :           |
| GmACO8  | : GENAWANVVDLMIND  | TCPGIS     | GIFKKEFGNT----   | AVWDREKIVLIIPDHY  | FTNDE           | AHRNVDIARDF    | :           |
| TaACO1  | : GENVVVDVLLIMTHD  | CGPGT      | IGIFKREFGED----  | AVWDREKVVLIIPDHY  | FTGDE           | ANRNVDILRDF    | :           |
| TaACO2  | : IPFKPARLVMDNTGG  | PAVVD      | LAAIRDVIAELSDPK  | KINPLVPVDLVIDES   | RVDDVA          | CADALKQNMDL    | :           |
| TaACO3  | :                  |            |                  |                   |                 |                | :           |
| TaACO4  | : IPFKPARLVMDNTGG  | PAVVD      | LAAIRDVIAELSDPK  | KINPLVPVDLVIDES   | RVDDVA          | CADALKQNMDL    | :           |
| TaACO5  | : IPFKPARLVMDNTGG  | PAVVD      | LAAIRDVIAELSDPK  | KINPLVPVDLVIDES   | RVDDVA          | CADALKQNMDL    | :           |
| TaACO6  | :                  | -----MTVLC | CLCLCALAYIAAC    | FFQVPVDLVIDES     | QVDVA           | SENAVQANMEL    | :           |
| TaACO7  | : IPFKPARVLLQDFTG  | PAVVD      | LACMRDAMSKLGSDEN | KINPLVPVDLVIDES   | QVDVA           | SENAVQANMEL    | :           |
| TaACO8  | : GENVVVDVLLIMTHD  | CGPGT      | IGIFKREFGED----  | AVWDREKVVLIIPDHY  | FTSDE           | ANRNVDILRDF    | :           |
| TaACO9  | : IPFKPARVLLQDFTG  | PAVVD      | LAAMRDALAKLGSDAN | KINPLVPVDLVIDES   | QVDVA           | SSNAIQSNMEL    | :           |
| TaACO10 | : GENVVVDVLLIMTHD  | CGPGT      | IGIFKREFGED----  | AVWDREKVVLIIPDHY  | FTSDE           | ANRNVDILRDF    | :           |
| TaACO11 | : IPFKPARVLLQDFTG  | PAVVD      | LAAMRDALAKLGSDAN | KINPLVPVDLVIDES   | QVDVA           | STNAIQSNMEL    | :           |
| TaACO12 | : GENVVVDVLLIMTHD  | CGPGT      | IGIFKREFGED----  | AVWDREKVVLIIPDHY  | FTSDE           | ANRNVDILRDF    | :           |
| TaACO13 | : IPFKPARVLLQDFTG  | PAVVD      | LAAMRDALAKLGSDAN | KINPLVPVDLVIDES   | QVDVA           | SSNAIQSNMEL    | :           |
| TaACO14 | : IPFKPSRVILQDFTG  | PVLVD      | LASMRDAMLELGGNPD | KINPMVPADLVIDES   | TANVV           | SQNAIQANMEL    | :           |
| TaACO15 | : IPFKPSRVILQDFTG  | PVLVD      | LASMRDAMSELGGNPD | KINPMVPADLVIDES   | TANVV           | SQNAIQANMEL    | :           |
| PpACO1  | : IPFKPARVILQDFTG  | PCVVD      | LAAMRDAIKRLGGDPS | KINPLVPVDLVIDES   | QVDVA           | KANAIQVNMKL    | :           |
| PpACO2  | : IPFKPARVILQDFTG  | PAVVD      | LAAMRDAITRLGGDPD | RINPLVPVDLVIDES   | QVDVA           | SANAIQANMEL    | :           |
| PpACO3  | : IPFKPARVILQDFTG  | PAVVD      | LAAMRDAITRLGGDPD | RINPLVPVDLVIDES   | QVDVA           | SANAIQANMEL    | :           |
| PpACO4  | : GENVWVKADLMTHD   | CGPGT      | IGIFKKEFGQN----  | AVWDREKIVLIIPDHY  | FTSDE           | ANRNVDILRDF    | :           |
| PpACO5  | : IPFKPARVILQDFTG  | PAVVD      | LAAMRDAIERLGGDPD | KINPLVPVDLVIDES   | QVDVA           | SPNAIQANMEL    | :           |
| SdACO1  | : IAFKPARVILQDFTG  | PAVVD      | LAAMRDAMKRLGGDEN | VINPMIPVDLVIDES   | QVDVA           | AANALEANMKH    | :           |
| SdACO2  | : IAFKPARVILQDFTG  | PAVVD      | LAAMRDAMKRLGGDEN | VINPMIPVDLVIDES   | QVDVA           | AANALEANMKH    | :           |
| SdACO3  | : GENVWVNADLMTHD   | CGPGT      | IGIFKKEFGAN----  | AVWDREKIVLIIPDHY  | FTADE           | ANRNVDILRDF    | :           |
| SdACO4  | :                  | -----MTHN  | CGPGP            | IGIFKKEFGANGEMCPQ | WDREKIVLIIPDHY  | FTADE          | ANRNVDILGDF |
| SdACO5  | : GENVWVNADLMTHD   | CGPGT      | IGIFKKEFGAN----  | AVWDREKIVLIIPDHY  | FTADE           | ANRNVDILRDF    | :           |
| SdACO6  | : IPFKPARVILQDFTG  | PALVD      | LAAMRDAMKRLGGDPT | KINPLIPVDLVIDES   | QVDVA           | SANAVASNMQF    | :           |
| SdACO7  | : IPFKPARVILQDFTG  | PALVD      | LAAMRDAMKRLGGDPT | KINPLIPVDLVIDES   | QVDVA           | SANAVASNMQF    | :           |

|         |   | *        | 300   | *       | 320           | *            | 340          | *                    |                 |                |              |       |       |         |         |   |
|---------|---|----------|-------|---------|---------------|--------------|--------------|----------------------|-----------------|----------------|--------------|-------|-------|---------|---------|---|
| AtACO1  | : | EFQRNKER | AF    | LSNAFHN | MLVVEPGSGIVE  | QVNLEYLARVVF | NTNGLLYPDSV  | VGTDSHITMIDGLG       | :               |                |              |       |       |         |         |   |
| AtACO2  | : | EFKRNKER | TFLK  | GSTAFQ  | NMLVVEPGSGIVE | QVNLEYLGRVVF | NSKGF        | LYPDSVVGTDSHITMIDGLG | :               |                |              |       |       |         |         |   |
| AtACO3  | : | EFQRNKER | AF    | LSNAFHN | MLVVEPGSGIVE  | QVNLEYLGRVVF | NTNGLLYPDSV  | VGTDSHITMIDGLG       | :               |                |              |       |       |         |         |   |
| AtACO4  | : | CREQNIKY | ----  | DI      | TDLG          | NFKAN        | LDYK         | SVCA                 | -----           | LAQEGHCRPGEV   | LG           | TD    | SHIT  | CTAGAFG | :       |   |
| OsACO1  | : | EFHRNKER | GFLK  | GSTAFR  | NMLVVEPGSGIVE | QVNLEYLARVVF | NNGG         | GILYPDSV             | VGTDSHITMIDGLG  | :              |              |       |       |         |         |   |
| OsACO2  | : | EFDRNKER | GFLK  | ASTAFH  | KMQVF         | EPGSGIVE     | QVNLEYLARVVF | NADG                 | IMYPDSV         | VGTDSHITMIDGLG | :            |       |       |         |         |   |
| OsACO3  | : | EFKRNKER | GFLK  | GSTAFH  | NMLVVEPGSGIVE | QVNLEYLGRVVF | NTDGI        | MYPDSV               | VGTDSHITMIDGLG  | :              |              |       |       |         |         |   |
| OsACO4  | : | CMEQNIKY | ----  | DI      | KDLS          | NFKAN        | LDYK         | SVCA                 | -----           | LAQEGHCRPGEV   | LG           | TD    | SHIT  | CNAGAFG | :       |   |
| GmACO1  | : | EFQRNKER | AF    | LSNAFHN | MLVVEPGSGIVE  | QVNLEYLGRVVF | NNEGLLYPDSV  | VGTDSHITMIDGLG       | :               |                |              |       |       |         |         |   |
| GmACO2  | : | EFQRNKER | AF    | LSNAFHN | MLVVEPGSGIVE  | QVNLEYLGRVVF | NTEGLLYPDSV  | VGTDSHITMIDGLG       | :               |                |              |       |       |         |         |   |
| GmACO3  | : | --VRNNER | AF    | LSNAFHN | MLVVEPGSGIVE  | QVNLEYLGRVVF | NTEGLLYPDSV  | VGTA                 | SHITMIDRLG      | :              |              |       |       |         |         |   |
| GmACO4  | : | CVEQDIKY | ----  | AI      | QDCS          | NFRAN        | LDCK         | -----                | -----           | -----          | -----        | ----- | ----- | -----   | :       |   |
| GmACO5  | : | CHEQNIKY | ----  | DI      | KDLS          | NFKAN        | LDYK         | SVCA                 | -----           | LAQEGHCRPGEV   | LG           | TD    | SHIT  | CTAGAFG | :       |   |
| GmACO6  | : | -----    | ----- | -----   | -----         | -----        | -----        | -----                | -----           | -----          | -----        | ----- | ----- | -----   | :       |   |
| GmACO7  | : | -----    | ----- | -----   | -----         | -----        | -----        | -----                | -----           | -----          | -----        | ----- | ----- | -----   | :       |   |
| GmACO8  | : | CVEQDIKY | ----  | DI      | QDRS          | NFRAN        | LDYK         | SVCA                 | -----           | LAQEGHCRPGEV   | LG           | TD    | SHIT  | SAGAFG  | :       |   |
| TaACO1  | : | CAEQKIKY | ----  | DI      | KDLS          | NFRAN        | LDYK         | SVCA                 | -----           | LAQEGHCRPGEV   | LG           | TD    | SHIT  | CNAGAFG | :       |   |
| TaACO2  | : | EFSRNKER | SFFK  | ASSAFN  | NMLVLEPGSGILE | QVNLEYLSRVVF | KADGV        | LYPDSV               | VGTDSHITMIDGLG  | :              |              |       |       |         |         |   |
| TaACO3  | : | -----    | ----- | -----   | -----         | -----        | -----        | -----                | -----           | -----          | -----        | ----- | ----- | -----   | :       |   |
| TaACO4  | : | EFSRNKER | SFFK  | ASSAFN  | NMLVLEPGSGILE | QVNLEYLSRVVF | KADGV        | LYPDSV               | VGTDSHITMIDGLG  | :              |              |       |       |         |         |   |
| TaACO5  | : | EFSRNKER | SFFK  | ASSAFN  | NMLVLEPGSGILE | QVNLEYLSRVVF | KADGV        | LYPDSV               | VGTDSHITMIDGLG  | :              |              |       |       |         |         |   |
| TaACO6  | : | EFSRNKER | GFLK  | GSTAFN  | NMLVVEPGSGIVE | QVNLEYLARVVF | NNGG         | GILYPDSV             | VGTDSHITMIDGLG  | :              |              |       |       |         |         |   |
| TaACO7  | : | EFSRNKER | GFLK  | GSTAFN  | NMLVVEPGSGIVE | QVNLEYLARVVF | NNGG         | GILYPDSV             | VGTDSHITMIDGLG  | :              |              |       |       |         |         |   |
| TaACO8  | : | CEEQKIKY | ----  | DI      | KDLS          | NFRAN        | LDYK         | SVCA                 | -----           | LAQEGHCRPGEV   | LG           | TD    | SHIT  | CNAGAFG | :       |   |
| TaACO9  | : | EFTNRNER | GFLK  | GSTAFQ  | NMLVVEPGSGIVE | QVNLEYLGRVVF | NTDGI        | MYPDSV               | VGTDSHITMIDGLG  | :              |              |       |       |         |         |   |
| TaACO10 | : | CEEQKIKY | ----  | DI      | KDLS          | NFRAN        | LDYK         | SVCA                 | -----           | LAQEGHCRPGEV   | LG           | TD    | SHIT  | CNAGAFG | :       |   |
| TaACO11 | : | EFTNRNER | GFLK  | GSTAFH  | NMLVVEPGSGIVE | QVNLEYLGRVVF | NTDGI        | MYPDSV               | VGTDSHITMIDGLG  | :              |              |       |       |         |         |   |
| TaACO12 | : | CEEQKIKY | ----  | DI      | KDLS          | NFRAN        | LDYK         | SVCA                 | -----           | LAQEGHCRPGEV   | LG           | TD    | SHIT  | CNAGAFG | :       |   |
| TaACO13 | : | EFTNRNER | GFLK  | GSTAFQ  | NMLVVEPGSGIVE | QVNLEYLGRVVF | NTDGI        | MYPDSV               | VGTDSHITMIDGLG  | :              |              |       |       |         |         |   |
| TaACO14 | : | EFERNKER | AF    | LSNAFHN | NMLIIEPGSGIVE | QVNLEYLARVVF | NRDGLLYPDSV  | VGTDSHITMIDGLG       | :               |                |              |       |       |         |         |   |
| TaACO15 | : | EFERNKER | AF    | LSNAFHN | NMLIIEPGSGIVE | -----        | -----        | -----                | -----           | -----          | -----        | ----- | ----- | -----   | :       |   |
| PpACO1  | : | EFQRNKER | AF    | LSNAFHN | MLVVEPGSGIVE  | QVNLEYLARVVF | NSEGYLYPDSV  | VGTDSHITMIDGLG       | :               |                |              |       |       |         |         |   |
| PpACO2  | : | EFSRNKER | GFLK  | GATAFK  | NMLVVEPGSGIVE | QVNLEYLARVVF | NNSG         | GILYPDT              | IVGTDSHITMIDGLG | :              |              |       |       |         |         |   |
| PpACO3  | : | EFSRNKER | GFLK  | GATAFK  | NMLVVEPGSGIVE | QVNLEYLARVVF | NNSG         | GILYPDT              | IVGTDSHITMIDGLG | :              |              |       |       |         |         |   |
| PpACO4  | : | AREQDIKY | ----  | DI      | TD            | DRS          | NFRAN        | LDYK                 | SVCA            | -----          | LAQEGHCRPGEV | LG    | TD    | SHIT    | CNAGAFG | : |
| PpACO5  | : | EFSRNKER | GFLK  | GATAFK  | NMLVVEPGSGIVE | QVNLEYLARVVF | NNSG         | GILYPDT              | IVGTDSHITMIDGLG | :              |              |       |       |         |         |   |
| SdACO1  | : | EFDRNKER | GFLK  | GATAFK  | NMLVVEPGSGIVE | QVNLEYLARVVF | SNDG         | FLYPDSV              | VGTDSHITMIDGLG  | :              |              |       |       |         |         |   |
| SdACO2  | : | EFDRNKER | GFLK  | GATAFK  | NMLVVEPGSGIVE | QVNLEYLARVVF | SNDG         | FLYPDSV              | VGTDSHITMIDGLG  | :              |              |       |       |         |         |   |
| SdACO3  | : | SKEQSIKY | ----  | DI      | TD            | DRG          | NFRAN        | LDYK                 | SVCA            | -----          | LAQEGHCRPGEV | LG    | TD    | SHIT    | CTAGAFG | : |
| SdACO4  | : | SKEQSIKY | ----  | DI      | TD            | DRG          | NFRAN        | LDYK                 | SVCA            | -----          | LAQEGHCRPGEV | LG    | TD    | SHIT    | CTAGAFG | : |
| SdACO5  | : | SKEQSIKY | ----  | DI      | TD            | DRS          | NFRAN        | LDYK                 | SVCA            | -----          | LAQEGHCRPGEV | LG    | TD    | SHIT    | CTAGAFG | : |
| SdACO6  | : | EFNRNKER | AF    | LSNAFHN | MLVVEPGSGIVE  | QVNLEYLARVVF | NRDG         | FLYPDSV              | VGTDSHITMIDGLG  | :              |              |       |       |         |         |   |
| SdACO7  | : | EFSRNKER | AF    | LSNAFHN | MLVVEPGSGIVE  | QVNLEYLARVVF | NRDG         | FLYPDSV              | VGTDSHITMIDGLG  | :              |              |       |       |         |         |   |

|         | 360          | *     | 380   | *     | 400   | *     | 420   |          |       |       |       |       |       |       |       |       |       |       |       |       |       |       |       |       |       |       |   |
|---------|--------------|-------|-------|-------|-------|-------|-------|----------|-------|-------|-------|-------|-------|-------|-------|-------|-------|-------|-------|-------|-------|-------|-------|-------|-------|-------|---|
| AtACO1  | : VAGWGVGGIE | EAT   | LGQPM | SNVLE | GVVGE | KLT   | KIR   | DGNTATD  | LVLT  | VTQM  | IRKH  | GVVG  | KFVE  | YH    | -     | EG    | :     |       |       |       |       |       |       |       |       |       |   |
| AtACO2  | : VAGWGVGGIE | EAA   | LGQPM | SNVLE | GVVGE | KLD   | KIK   | EGVTATD  | LVLT  | VTQI  | IRKH  | GVVG  | KFVE  | Y-    | -     | EG    | :     |       |       |       |       |       |       |       |       |       |   |
| AtACO3  | : VAGWGVGGIE | EAT   | LGQPM | SNVLE | GVVGE | KIA   | KIK   | RNGVTATD | LVLT  | VTQM  | IRKH  | GVVG  | KFVE  | Y-    | -     | NG    | :     |       |       |       |       |       |       |       |       |       |   |
| AtACO4  | : QFATGIGNTD | GFV   | GTGK  | ILIK  | VEPT  | IR    | V     | D        | EP    | PSYL  | QAKD  | LIL   | Q     | I     | GE    | SV    | AG    | ATY   | K     | T     | M     | E     | S     | -     | TT    | :     |   |
| OsACO1  | : VAGWGVGGIE | EAT   | LGQPM | SNVLE | GVVGE | KLT   | KIK   | RNGVTATD | LVLT  | VTQM  | IRKH  | GVVG  | KFVE  | Y-    | -     | GG    | :     |       |       |       |       |       |       |       |       |       |   |
| OsACO2  | : VAGWGVGGIE | IVA   | LGQPM | SNVLE | GVVGE | KLS   | M     | RDGVTATD | LVLT  | VTQM  | IRKH  | GVVG  | KFVE  | Y-    | -     | VG    | :     |       |       |       |       |       |       |       |       |       |   |
| OsACO3  | : VAGWGVGGIE | EAT   | LGQPM | SNVLE | GVVGE | KLT   | KIK   | QNGVTATD | LVLT  | VTQM  | IRKH  | GVVG  | KFVE  | Y-    | -     | EG    | :     |       |       |       |       |       |       |       |       |       |   |
| OsACO4  | : QFATGIGNTD | GFV   | GTGK  | ILIK  | VEPT  | IR    | V     | D        | EP    | PPYL  | ILAK  | DIL   | Q     | I     | GE    | SV    | S     | ATY   | K     | S     | M     | E     | S     | -     | ST    | :     |   |
| GmACO1  | : VAGWGVGGIE | EAA   | LGQPM | SNVLE | GVVGE | KLS   | KIK   | RNGVTATD | LVLT  | VTQI  | IRKH  | GVVG  | KFVE  | Y-    | -     | DG    | :     |       |       |       |       |       |       |       |       |       |   |
| GmACO2  | : VAGWGVGGIE | EAA   | LGQPM | SNVLE | GVVGE | KLS   | KIK   | RNGVTATD | LVLT  | VTQI  | IRKH  | GVVG  | KFVE  | Y-    | -     | DG    | :     |       |       |       |       |       |       |       |       |       |   |
| GmACO3  | : VAGWGVGGIE | EAT   | LGQPM | SNVLE | GVVGE | KLS   | KIK   | CNGVTATD | LVLT  | VTQI  | IRKH  | GVVG  | KFVE  | Y-    | -     | N-    | :     |       |       |       |       |       |       |       |       |       |   |
| GmACO4  | : -----      | GTGK  | VLIK  | VEPT  | IR    | V     | E     | EP       | PCYL  | ILAK  | GLIL  | H     | N     | GE    | S     | M     | S     | AS    | Y     | K     | G     | K     | E     | -     | TT    | :     |   |
| GmACO5  | : QFATGIGNTD | GFV   | GTGK  | ILIK  | VEPT  | IR    | V     | D        | EP    | PPYL  | ILAK  | DIL   | Q     | I     | GE    | SV    | S     | ATY   | K     | S     | M     | E     | S     | -     | TT    | :     |   |
| GmACO6  | : VAGWGVGGIE | EAA   | LGQ   | ----- | ----- | ----- | ----- | N        | ----- | ----- | ----- | ----- | ----- | ----- | ----- | ----- | ----- | ----- | ----- | ----- | ----- | ----- | ----- | ----- | ----- | ----- | : |
| GmACO7  | : VAGWGVGGIE | QAA   | LGQ   | ----- | ----- | ----- | ----- | N        | ----- | ----- | ----- | ----- | ----- | ----- | ----- | ----- | ----- | ----- | ----- | ----- | ----- | ----- | ----- | ----- | ----- | ----- | : |
| GmACO8  | : QFATGIGNTD | AFV   | GTGK  | ILIK  | VEPT  | IR    | V     | D        | EP    | KPSYL | ILAK  | DIL   | N     | I     | GE    | SV    | S     | ATY   | K     | T     | M     | E     | S     | -     | TT    | :     |   |
| TaACO1  | : QFATGIGNTD | GFV   | GTGK  | ILIK  | VEPT  | IR    | V     | D        | EP    | PPYL  | ILAK  | DIL   | Q     | I     | GE    | SV    | S     | ATY   | K     | S     | M     | E     | S     | -     | ST    | :     |   |
| TaACO2  | : VAGWGVGGIE | EAA   | LGQPM | SNVLE | GVVGE | KLT   | KIK   | QDGVTTT  | DIAL  | TLTQM | IRKH  | GVVG  | KFIE  | F     | Y     | -     | EG    | :     |       |       |       |       |       |       |       |       |   |
| TaACO3  | : -----      | ----- | ----- | ----- | ----- | ----- | ----- | -----    | ----- | ----- | ----- | ----- | ----- | ----- | ----- | ----- | ----- | ----- | ----- | ----- | ----- | ----- | ----- | ----- | ----- | ----- | : |
| TaACO4  | : VAGWGVGGIE | EAA   | LGQPM | SNVLE | GVVGE | KLT   | KIK   | QDGVTTT  | DIAL  | TLTQM | IRKH  | GVVG  | KFIE  | F     | Y     | -     | EG    | :     |       |       |       |       |       |       |       |       |   |
| TaACO5  | : VAGWGVGGIE | EAA   | LGQPM | SNVLE | GVVGE | KLT   | KIK   | QDGVTTT  | DIAL  | TLTQM | IRKH  | GVVG  | KFIE  | F     | Y     | -     | EG    | :     |       |       |       |       |       |       |       |       |   |
| TaACO6  | : VAGWGVGGIE | EAT   | LGQPM | SNVLE | GVVGE | KLS   | KIK   | RNGVTATD | LVLT  | VTQM  | IRKH  | GVVG  | KFVE  | Y-    | -     | GG    | :     |       |       |       |       |       |       |       |       |       |   |
| TaACO7  | : VAGWGVGGIE | EAT   | LGQPM | SNVLE | GVVGE | KLS   | KIK   | RNGVTATD | LVLT  | VTQM  | IRKH  | GVVG  | KFVE  | Y-    | -     | GG    | :     |       |       |       |       |       |       |       |       |       |   |
| TaACO8  | : QFATGIGNTD | GFV   | GTGK  | ILIK  | VEPT  | IR    | V     | D        | EP    | PPYL  | ILAK  | DIL   | Q     | I     | GE    | SV    | S     | ATY   | K     | S     | M     | E     | S     | -     | ST    | :     |   |
| TaACO9  | : VAGWGVGGIE | EAT   | LGQPM | SNVLE | GVVGE | KLS   | KIK   | RNGVTATD | LVLT  | VTQM  | IRKH  | GVVG  | KFVE  | Y-    | -     | EG    | :     |       |       |       |       |       |       |       |       |       |   |
| TaACO10 | : QFATGIGNTD | GFV   | GTGK  | ILIK  | VEPT  | IR    | V     | D        | EP    | PPYL  | ILAK  | DIL   | Q     | I     | GE    | SV    | S     | ATY   | K     | S     | M     | E     | S     | -     | ST    | :     |   |
| TaACO11 | : VAGWGVGGIE | EAT   | LGQPM | SNVLE | GVVGE | KLT   | KIK   | RNGVTATD | LVLT  | VTQM  | IRKH  | GVVG  | KFVE  | Y-    | -     | EG    | :     |       |       |       |       |       |       |       |       |       |   |
| TaACO12 | : QFATGIGNTD | GFV   | GTGK  | ILIK  | VEPT  | IR    | V     | D        | EP    | PPYL  | ILAK  | DIL   | Q     | I     | GE    | SV    | S     | ATY   | K     | S     | M     | E     | S     | -     | ST    | :     |   |
| TaACO13 | : VAGWGVGGIE | EAT   | LGQPM | SNVLE | GVVGE | KLT   | KIK   | RNGVTATD | LVLT  | VTQM  | IRKH  | GVVG  | KFVE  | Y-    | -     | EG    | :     |       |       |       |       |       |       |       |       |       |   |
| TaACO14 | : VVGWGVGGID | EAA   | LGQPM | SNVLE | GVVGE | KLT   | KIK   | RDGVTATD | LVLT  | VTQM  | IRKH  | GVVG  | KFVE  | Y-    | -     | RG    | :     |       |       |       |       |       |       |       |       |       |   |
| TaACO15 | : -----      | ----- | ----- | ----- | ----- | ----- | ----- | -----    | ----- | ----- | ----- | ----- | ----- | ----- | ----- | ----- | ----- | ----- | ----- | ----- | ----- | ----- | ----- | ----- | ----- | ----- | : |
| PpACO1  | : VAGWGVGGIE | EAV   | LGQPM | SNVLE | GVVGE | KLS   | KIK   | KTGVTATD | LVLT  | VTQM  | IRKH  | GVVG  | KFVE  | Y-    | -     | KG    | :     |       |       |       |       |       |       |       |       |       |   |
| PpACO2  | : VAGWGVGGIE | EAA   | LGQPM | SNVLE | GVVGE | KLN   | KIK   | RTGVTATD | LVLT  | VTQI  | IRKH  | GVVG  | KFVE  | Y-    | -     | KG    | :     |       |       |       |       |       |       |       |       |       |   |
| PpACO3  | : VAGWGVGGIE | EAA   | LGQPM | SNVLE | GVVGE | KLN   | KIK   | RTGVTATD | LVLT  | VTQI  | IRKH  | GVVG  | KFVE  | Y-    | -     | KG    | :     |       |       |       |       |       |       |       |       |       |   |
| PpACO4  | : QFATGIGNTD | GFV   | GTGK  | ILIK  | VEPT  | IR    | V     | D        | EP    | KYL   | ILAK  | DIL   | Q     | I     | GE    | SV    | AG    | ATY   | R     | A     | M     | E     | S     | -     | TA    | :     |   |
| PpACO5  | : VAGWGVGGIE | EAA   | LGQPM | SNVLE | GVVGE | KLN   | KIK   | RTGVTATD | LVLT  | VTQM  | IRKH  | GVVG  | KFVE  | Y-    | -     | KG    | :     |       |       |       |       |       |       |       |       |       |   |
| SdACO1  | : VAGWGVGGIE | EAA   | LGQPM | SNVLE | GVVGE | KLS   | KIK   | RTGVTATD | LVLT  | VTQM  | IRKH  | GVVG  | KFVE  | Y-    | -     | KG    | :     |       |       |       |       |       |       |       |       |       |   |
| SdACO2  | : VAGWGVGGIE | EAA   | LGQPM | SNVLE | GVVGE | KLS   | KIK   | RTGVTATD | LVLT  | VTQM  | IRKH  | GVVG  | KFVE  | Y-    | -     | KG    | :     |       |       |       |       |       |       |       |       |       |   |
| SdACO3  | : QFATGIGNTD | GFV   | GTGK  | ILIK  | VEPT  | IR    | V     | D        | EP    | PSYL  | ILAK  | DIL   | Q     | I     | GE    | TV    | S     | ATY   | K     | S     | M     | E     | S     | -     | TA    | :     |   |
| SdACO4  | : QFATGIGNTD | GFV   | GTGK  | ILIK  | VEPT  | IR    | V     | D        | EP    | PSYL  | ILAK  | DIL   | Q     | I     | GE    | TV    | S     | ATY   | K     | S     | M     | E     | S     | -     | TA    | :     |   |
| SdACO5  | : QFATGIGNTD | GFV   | GTGK  | ILIK  | VEPT  | IR    | V     | D        | EP    | PSYL  | ILAK  | DIL   | Q     | I     | GE    | TV    | S     | ATY   | K     | S     | M     | E     | S     | -     | TA    | :     |   |
| SdACO6  | : VAGWGVGGIE | EAT   | LGQPM | SNVLE | GVVGE | KLV   | KIK   | QAGVTATD | LVLT  | VTQM  | IRKH  | GVVG  | KFVE  | Y-    | -     | EG    | :     |       |       |       |       |       |       |       |       |       |   |
| SdACO7  | : VAGWGVGGIE | EAT   | LGQPM | SNVLE | GVVGE | KLV   | KIK   | QAGVTATD | LVLT  | VTQM  | IRKH  | GVVG  | KFVE  | Y-    | -     | EG    | :     |       |       |       |       |       |       |       |       |       |   |



|         |   | *                            | 440   | *   | 460     | *              | 480   | *                   |
|---------|---|------------------------------|-------|-----|---------|----------------|-------|---------------------|
| AtACO1  | : | MSRELS                       | ----- | LAD | RATTANN | SPEYGATMGFFFEV | ----- | HVTLDYLRRLTGRS      |
| AtACO2  | : | MSELS                        | ----- | LAD | RATTANN | SPEYGATMGFFFEV | ----- | HVTLEYLKLITGRS      |
| AtACO3  | : | MSGLS                        | ----- | LAD | RATTANN | SPEYGATMGFFFEV | ----- | HVTLDYLRRLTGRS      |
| AtACO4  | : | IESLS                        | ----- | NEE | MTICNN  | VVEAGGKNGVVP   | ----- |                     |
| OsACO1  | : | MSELS                        | ----- | LAD | RATTANN | SPEYGATMGFFFEV | ----- | GKTLDYLRRLTGRS      |
| OsACO2  | : | VGEIS                        | ----- | LPA | RATTANN | SPEYGASMGFFFEV | ----- | HYNYLKRISSFHTRLIKQH |
| OsACO3  | : | MGKLS                        | ----- | LAD | RATTANN | SPEYGATMGFFFEV | ----- | HVTLDYLRRLTGRS      |
| OsACO4  | : | VESIN                        | ----- | NEE | MTICNN  | VVEAGGKNGVVP   | ----- |                     |
| GmACO1  | : | MGEIS                        | ----- | LAD | RATTANN | SPEYGATMGFFFEV | ----- | HVTLDYLRRLTGRS      |
| GmACO2  | : | MGEIS                        | ----- | LAD | RATTANN | SPEYGATMGFFFEV | ----- | HVTLDYLRRLTGRS      |
| GmACO3  | : |                              | ----- |     |         |                | ----- |                     |
| GmACO4  | : | IENLS                        | ----- | NEE | MAICNN  | VVEAVGKNSIVVT  | ----- |                     |
| GmACO5  | : | VESLT                        | ----- | NEE | MTICNN  | VVEAGGKNGVVP   | ----- |                     |
| GmACO6  | : |                              | ----- |     | RTIGGT  |                | ----- | LR                  |
| GmACO7  | : |                              | ----- |     | RTIGGT  |                | ----- | LR                  |
| GmACO8  | : | IESLS                        | ----- | NEE | MTICNN  | VVEAGGKNSIVAA  | ----- |                     |
| TaACO1  | : | IESIN                        | ----- | NEE | MTICNN  | VVEAGGKNGVVP   | ----- |                     |
| TaACO2  | : | VGSIP                        | ----- | LPA | RATTANN | TPEYGATMGFFFEV | ----- | QVALDYLRRLIGRS      |
| TaACO3  | : | VGSIP                        | ----- | LPA | RATTANN | TPEYGATMGFFFEV | ----- | QVGLDYLRRLIGRS      |
| TaACO4  | : | VGSIP                        | ----- | LPA | RATTANN | TPEYGATMGFFFEV | ----- | QVALDYLRRLIGRS      |
| TaACO5  | : | VGSIP                        | ----- | LPA | RATTANN | TPEYGATMGFFFEV | ----- | QVALDYLRRLIGRS      |
| TaACO6  | : | MGEIS                        | ----- | LAD | RATTANN | APEYGATMGFFFEV | ----- | AKTLDYLRRLTGRS      |
| TaACO7  | : | MGEIS                        | ----- | LAD | RATTANN | APEYGATMGFFFEV | ----- | AKTLDYLRRLTGRS      |
| TaACO8  | : | IESLT                        | ----- | NEE | MTICNN  | VVEAGGKNGVVP   | ----- |                     |
| TaACO9  | : | MGKLS                        | ----- | LAD | RATTANN | SPEYGATMGFFFEV | ----- | HVTLDYLRRLTGRS      |
| TaACO10 | : | IESIT                        | ----- | NEE | MTICNN  | VVEAGGKNGVVP   | ----- |                     |
| TaACO11 | : | MGKLS                        | ----- | LAD | RATTANN | SPEYGATMGFFFEV | ----- | HVTLDYLRRLTGRS      |
| TaACO12 | : | IESLT                        | ----- | NEE | MTICNN  | VVEAGGKNGVVP   | ----- |                     |
| TaACO13 | : | MGKLS                        | ----- | LAD | RATTANN | SPEYGATMGFFFEV | ----- | HVTLDYLRRLTGRS      |
| TaACO14 | : | NEELA                        | ----- | LAD | RTTANN  | APEYGATVGFEEV  | ----- | HITLEYLMKTGRE       |
| TaACO15 | : | NEELA                        | ----- | LAD | RATTANN | APEYGATVGFEEV  | ----- | HITLEYLMKTGRE       |
| PpACO1  | : | MAEIS                        | ----- | LAD | RATTANN | APEYGATMGFFFEV | ----- | KITLDYLTLTGRE       |
| PpACO2  | : | MSELT                        | ----- | LAD | RATTANN | SPEYGATMGFFFEV | ----- | RVSLDYLMKTGRD       |
| PpACO3  | : | MSELT                        | ----- | LAD | RATTANN | SPEYGATMGFFFEV | ----- | RVSLDYLMKTGRD       |
| PpACO4  | : | VDAMT                        | ----- | NEE | MTICNN  | VVEAGGKNGVVP   | ----- |                     |
| PpACO5  | : | MSELT                        | ----- | LAD | RATTANN | SPEYGATMGFFFEV | ----- | RVTLDYLRMTGRD       |
| SdACO1  | : | MQEIS                        | ----- | LAD | RATTANN | SPEYGATMGFFFEV | ----- | HVSLQYLRMTGRE       |
| SdACO2  | : | MQEIS                        | ----- | LAD | RATTANN | SPEYGATMGFFFEV | ----- | HVSLQYLRMTGRD       |
| SdACO3  | : | VERMT                        | ----- | NEE | MTICNN  | AIAGGKNGVVP    | ----- |                     |
| SdACO4  | : | VERMT                        | ----- |     |         |                | ----- |                     |
| SdACO5  | : | VERMTVSSFSPLYLIEIVHLISRSELTQ | ----- | NEE | MTICNN  | AIAGGKNGVVP    | ----- |                     |
| SdACO6  | : | VSCIS                        | ----- | LAD | RATTANN | SPEYGATMGFFFEV | ----- | QMTINYLSTGRD        |
| SdACO7  | : | VSCIS                        | ----- | LAD | RATTANN | SPEYGATMGFFFEV | ----- | QMTINYLSTGRD        |

|         | 500 | *                  | 520                 | *        | 540               | *               | 560          |
|---------|-----|--------------------|---------------------|----------|-------------------|-----------------|--------------|
| AtACO1  | :   | -----DDT           | VSMIEAYLRANK        | FVD      | YSEPEKSTV         | SSCIELNLEDVEFC  | SGPKRTHDFVP  |
| AtACO2  | :   | -----DET           | VSMIESYLRRAN        | FVD      | YNPPQGERA         | TSYLQLDLGHVEFC  | ISGPKRTHDFVP |
| AtACO3  | :   | -----DET           | VAMIEAYLRANK        | FVD      | YNPPQDRV          | SSYLELNIDDEVEFC | ISGPKRTHDFVT |
| AtACO4  | :   | -----ATT           | LNIVENRTS           | P        | FEFVYSDGNAS       | VADYRFVSKLEIVAK | HSIDNR--     |
| OsACO1  | :   | -----DDT           | VAMIESYLRRAN        | FVD      | YNQPEAERV         | SSYLELNIEEVEFC  | ISGPKRTHDFVT |
| OsACO2  | :   | NLAITCTYDITRCMHNNK | VSMIEAYLRANK        | FVE      | HHHPHTERV         | SSYLELNINIDVEFC | ISGPKRTHDFVP |
| OsACO3  | :   | -----DET           | VAMIEAYLRANK        | FVD      | YNPPQTERV         | SSYLELDINEVEFC  | ISGPKRTHDFVL |
| OsACO4  | :   | -----Q             | TTFNYLEGKTS         | E        | YEPVYSDAQAR       | VSDYRFVSKLEIVAK | HSIDNR--     |
| GmACO1  | :   | -----DEI           | VAMIESYLRENK        | FVD      | YNPPQDRV          | SSYLELNISDVEFC  | ISGPKRTHDFVP |
| GmACO2  | :   | -----DET           | VAMIEAYLRANK        | FID      | YNPPQDRV          | SSYLELNIDEVEFC  | ISGPKRTHDFVP |
| GmACO3  | :   | -----              |                     |          |                   |                 |              |
| GmACO4  | :   | -----T             | YKYLGDMTLAPYEPVFS   | DENAR    | LVQYRFVASKMEELVAK | HSIDNR--        |              |
| GmACO5  | :   | -----S             | TTFKYLEGKTS         | P        | YEPVYSDDQAR       | LAEYRFVSKLEIVAK | HSIDNR--     |
| GmACO6  | :   | -----I             | LAVAL               |          |                   |                 |              |
| GmACO7  | :   | -----I             | LAVAL               |          |                   |                 |              |
| GmACO8  | :   | -----R             | TTYKYLEDKTSAPYEPVSS | DENAR    | LAQYRFVSNMEELVAK  | HSIDNR--        |              |
| TaACO1  | :   | -----E             | TTFKYLEGKTS         | E        | YEPVYSDAQAR       | YSDYRFVSKLEIVAK | HSIDNR--     |
| TaACO2  | :   | -----DET           | VSMIEAYLRANK        | FVD      | CNELQTGPV         | SSDLELDITTTVEFS | VAGPKRTHDFVP |
| TaACO3  | :   | -----DET           | VSMIEAYLRANK        | FVD      | CNEPQTGPV         | SSDLELDITTTVEFS | VAGPKRTHDFVP |
| TaACO4  | :   | -----DET           | VSMIEAYLRANK        | FVD      | CNEPQTGPV         | SSDLELDITTTVEFS | VAGPKRTHDFVP |
| TaACO5  | :   | -----DET           | VSMIEAYLRANK        | FVD      | CNEPQTGPV         | SSDLELDITTTVEFS | VAGPKRTHDFVP |
| TaACO6  | :   | -----DET           | VAMIEAYLRANK        | FVD      | YKQVQAERV         | SSYLELDIDEVEFC  | ISGPKRTHDFVT |
| TaACO7  | :   | -----DET           | VAMIEAYLRANK        | FVD      | YKQVQAERV         | SSYLELDIDEVEFC  | ISGPKRTHDFVT |
| TaACO8  | :   | -----E             | TTFKYLEGKTI         | E        | YEPVYSDAQAR       | YSDYRFVSKLEIVAK | HSIDNR--     |
| TaACO9  | :   | -----DET           | VSMIEAYLRANK        | FVD      | YNPPQLERV         | SSYLALDIDEVEFC  | ISGPKRTHDFVT |
| TaACO10 | :   | -----E             | TTFKYLEGKTS         | E        | YEPVYSDAQAR       | YSDYRFVSKLEIVAK | HSIDNR--     |
| TaACO11 | :   | -----DET           | VSMIEAYLRANK        | FVD      | YNPPQAERV         | SSYLALDIDEVEFC  | ISGPKRTHDFVT |
| TaACO12 | :   | -----E             | TTFKYLEGKTS         | E        | YEPVYSDAQAR       | YSDYRFVSKLEIVAK | HSIDNR--     |
| TaACO13 | :   | -----DET           | VSMIEAYLRANK        | FVD      | YNPPQLERV         | SSYLALDIDEVEFC  | ISGPKRTHDFVT |
| TaACO14 | :   | -----DET           | VSTIEAYLRANK        | FVD      | YNPPKIEPT         | SSYLALDIDVEFC   | ISGPKRTHDFVT |
| TaACO15 | :   | -----DET           | VSTIEAYLRANK        | FVD      | YNPPKIEPT         | SSYLALDIDVEFC   | ISGPKRTHDFVT |
| PpACO1  | :   | -----G             | KKVKEIEGYLRANK      | FID      | HSPKPKDNK         | SSHLELDINTVEFC  | ISGPKRTHDFVN |
| PpACO2  | :   | -----E             | KKVEEIEAYLRANK      | FID      | HEKPRKDNT         | SAYLELDIDTVEFC  | ISGPKRTHDFVA |
| PpACO3  | :   | -----E             | KKVEEIEAYLRANK      | FID      | HEKPRKDNT         | SAYLELDIDTVEFC  | ISGPKRTHDFVA |
| PpACO4  | :   | -----A             | TTAKYLEGKTSKPQVFTS  | DGNAS    | LQYRFVSKLEIVAK    | HSIDNR--        |              |
| PpACO5  | :   | -----E             | ERVEEIEAYLRANK      | FVD      | HEK--KDNT         | SGHLELDIDTVEFC  | ISGPKRTHDFVT |
| SdACO1  | :   | -----E             | KKVEMIESYLRRAN      | FID      | YNPPTEKV          | SSYLELDIDSVQFC  | ISGPKRTHDFVN |
| SdACO2  | :   | -----E             | KKVEMIESYLRRAN      | FID      | YDEPTEKV          | SSYLELDIDSVQFC  | ISGPKRTHDFVN |
| SdACO3  | :   | -----E             | VTSYLKGKTDKEFESVYS  | DAGAT    | IQEYRIVSKLEIVAK   | HSIDNR--        |              |
| SdACO4  | :   | -----E             | YRTIVSKLEIVAK       | HSIDNR-- |                   |                 |              |
| SdACO5  | :   | -----E             | VTSYLKGKTEKEFESVYS  | DAGAT    | IQEYRIVSKLEIVAK   | HSIDNR--        |              |
| SdACO6  | :   | -----A             | EKKVMEAYLRANK       | FVD      | YSQKQPETV         | SAYLELDIGSVEFC  | ISGPKRTHDFVS |
| SdACO7  | :   | -----A             | EKKVMEAYLRANK       | FVD      | YSQKQPETV         | SAYLELDIGSVEFC  | ISGPKRTHDFVS |

|         | * | 580         | *               | 600           | *            | 620              | *               |                   |                  |
|---------|---|-------------|-----------------|---------------|--------------|------------------|-----------------|-------------------|------------------|
| AtACO1  | : | LKEMKADWHS  | CLDNFVGFKGF     | AVPKEAQSKAVE  | FN           | NGTTAQLRHGDNVIAA | T               | SCTNTSNPSVNLGAGL  |                  |
| AtACO2  | : | LKDMKADWHAC | LDNFVGFKGF      | AVPKEKQEEVVKF | SY           | NGQPAELKHGSDVIAA | T               | SCTNTSNPSVNLGAGL  |                  |
| AtACO3  | : | LKEMKADWHS  | CLDSKVGFKGF     | AIPKEAQEKVVNF | SE           | DGQPAELKHGSDVIAA | T               | SCTNTSNPSVNLGAGL  |                  |
| AtACO4  | : | -----       | -----           | -----         | ---          | ALARECKDVKIDRVY  | G               | SCTGGKTEDFNAAGKL  |                  |
| OsACO1  | : | LKNMKS      | SDWLSCLDND      | VGFKGF        | AVPKESQGKVAE | FS               | HGTPAKLRHGDVIAA | T                 | SCTNTSNPNVNLGAGL |
| OsACO2  | : | LKEMKSDWHAC | LDNRVGFKGF      | AVPREQDKVVKF  | ED           | QGQPAELKHGSDVIAA | T               | SCTNTSNPSVNLGAGL  |                  |
| OsACO3  | : | LKEMKSDWHS  | CLDNFVGFKGF     | AVPKEQDKVVKF  | ED           | HGQPAELKHGSDVIAA | T               | SCTNTSNPSVNLGAGL  |                  |
| OsACO4  | : | -----       | -----           | -----         | ---          | ALARECKDVKIDRVY  | G               | SCTGGKTEDFFAAGKV  |                  |
| GmACO1  | : | LKEMKADWHAC | LDNKVGFKGF      | AIPKEAQGKVAE  | ED           | HGQPAELKHGSDVIAA | T               | SCTNTSNPSVNLGAGL  |                  |
| GmACO2  | : | LKEMKADWHAC | LDNNVGFKGF      | AIPKDVQGKVAE  | ED           | HGQPAELKHGSDVIAA | T               | SCTNTSNPSVNLGAGL  |                  |
| GmACO3  | : | -----       | -----           | -----         | ---          | -----            | ---             | -----             |                  |
| GmACO4  | : | -----       | -----           | -----         | ---          | ALL-----         | ---             | AQLKFLCFSFLLHKRV  |                  |
| GmACO5  | : | -----       | -----           | -----         | ---          | ALARECKDVKIDRVY  | G               | SCTGGKTEDFNAAGKV  |                  |
| GmACO6  | : | ---         | MK-----         | -----         | ---          | IKQGSRVVVAQA     | ---             | KLICGSGI          |                  |
| GmACO7  | : | ---         | MK-----         | -----         | ---          | IKQGSRVVVAQA     | ---             | KLICGSGI          |                  |
| GmACO8  | : | -----       | -----           | -----         | ---          | ALARECNNVKIDRVY  | G               | SCTGGKTEDFNAAGKV  |                  |
| TaACO1  | : | -----       | -----           | -----         | ---          | ALARECKDVKIDRVY  | G               | SCTGGKTEDFIAAGKV  |                  |
| TaACO2  | : | LKEMKSDWHT  | CLGNEVGFKGY     | AVPKEEHNKIVK  | ED           | HGQPAELKHGSDVIAA | T               | SCTNTSNPSVNLGAGL  |                  |
| TaACO3  | : | LKEMKSDWHAC | CLGNEVGFKGY     | AVPKEQHNKIVK  | ED           | HGQPAELKHGSDVIAA | T               | SCTNTSNPSVNLGAGL  |                  |
| TaACO4  | : | LKEMKSDWHAC | CLGNEVGFKGY     | AVPKEQHNKIVK  | ED           | HGQPAELKHGSDVIAA | T               | SCTNTSNPSVNLGAGL  |                  |
| TaACO5  | : | LKEMKSDWHAC | CLGNEVGFKGY     | AVPKEQHNKIVK  | ED           | HGQPAELKHGSDVIAA | T               | SCTNTSNPSVNLGAGL  |                  |
| TaACO6  | : | LKNMQSDWLS  | CLDNKVGFKGF     | AVPKESQGKVAE  | FS           | RGTPAKLRHGDVIAA  | T               | SCTNTSNPNVNLGAGL  |                  |
| TaACO7  | : | LKNMQSDWLS  | CLDNKVGFKGF     | AVPKESQAKVAE  | FS           | RGTPAKLRHGDVIAA  | T               | SCTNTSNPNVNLGAGL  |                  |
| TaACO8  | : | -----       | -----           | -----         | ---          | ALARECKDVKIDRVY  | G               | SCTGGKTEDFIAAGKV  |                  |
| TaACO9  | : | LKDMKSDWHAC | LDNKVGFKGF      | AVPKEQDKVVKF  | ED           | NGQPAELKHGSDVIAA | T               | SCTNTSNPSVNLGAGL  |                  |
| TaACO10 | : | -----       | -----           | -----         | ---          | ALARECKDVKIDRVY  | G               | SCTGGKTEDFIAAGKV  |                  |
| TaACO11 | : | LKDMKSDWHAC | LDNKVGFKGF      | AVPKEQDKVVKF  | ED           | NGQPAELKHGSDVIAA | T               | SCTNTSNPSVNLGAGL  |                  |
| TaACO12 | : | -----       | -----           | -----         | ---          | ALARECKDVKIDRVY  | G               | SCTGGKTEDFIAAGKV  |                  |
| TaACO13 | : | LKDMKSDWHAC | LDNKVGFKGF      | AVPKEQDKVVKF  | ED           | NGQPAELKHGSDVIAA | T               | SCTNTSNPSVNLGAGL  |                  |
| TaACO14 | : | LKDMKT      | DWHACLENKIGFKGY | GIPKDLQNRVVK  | ED           | HGRTAELKHGTVIAA  | T               | SCTNTSNPTVNIASGL  |                  |
| TaACO15 | : | LKDMKADWHAC | LENKIGFKGY      | GIPKDLQNRVVK  | ED           | HGQTAELKHGTVIAA  | T               | SCTNTSNPTVNIASGL  |                  |
| PpACO1  | : | LREMKKDWKDC | LNKVGFKGF       | AIPKDKQSKVAK  | FS           | EGKAAELRHGSDVIAA | T               | SCTNTSNPSVNLGAGL  |                  |
| PpACO2  | : | IKDMKQDWQS  | CLDNKVGFKGF     | AIPKQDQEKVAK  | FT           | EGKPAELRHGSDVIAA | T               | SCTNTSNPSVNLGAGL  |                  |
| PpACO3  | : | IKDMKQDWQS  | CLDNKVGFKGF     | AIPKQDQEKVAK  | FT           | EGKPAELRHGSDVIAA | T               | SCTNTSNPSVNLGAGL  |                  |
| PpACO4  | : | -----       | -----           | -----         | ---          | GLARECKDVKIDRVY  | G               | SCTGGKTEDFIAAGEL  |                  |
| PpACO5  | : | LKDMKQDWQA  | CLDNKVGFKGF     | AIPKEQDKVVKF  | FT           | EGKPAELRHGSDVIAA | T               | SCTNTSNPSVNLGAGL  |                  |
| SdACO1  | : | LKDMKEDWHN  | CLDSKVGFKGF     | GVPKDEQSAIAK  | KE           | EGKPAELRHGSDVIAA | T               | SCTNTSNPSVNLGAGL  |                  |
| SdACO2  | : | LKDMKEDWHN  | CLDSKVGFKGF     | GVPKDEQSAIAK  | KE           | EGKPAELRHGSDVIAA | T               | SCTNTSNPSVNLGAGL  |                  |
| SdACO3  | : | -----       | -----           | -----         | ---          | ALARDCCKDVKIDRVY | G               | SCTGGKTEDFVAAAKL  |                  |
| SdACO4  | : | -----       | -----           | -----         | ---          | ALARNCCKDVKIDRVY | G               | SCTGGKTEDFVVAAGKL |                  |
| SdACO5  | : | -----       | -----           | -----         | ---          | VLARDCCKDVKIDRVY | G               | SCTGGKTEDFVAAAKL  |                  |
| SdACO6  | : | LKDMKADWQA  | CLDNKVGFKGF     | NIPKDLQHKTAQ  | FT           | EGKPAELRHGSDVIAA | T               | SCTNTSNPYVNLGAGL  |                  |
| SdACO7  | : | LKDMKADWQA  | CLDNKVGFKGF     | NIPKDLQHKTAQ  | FT           | EGKPAELRHGSDVIAA | T               | SCTNTSNPYVNLGAGL  |                  |

|         | 640         | *    | 660                 | *     | 680                         | *             | 700 |
|---------|-------------|------|---------------------|-------|-----------------------------|---------------|-----|
| AtACO1  | : VAKKACD   | IGLE | -----               | ----- | VKPWIKTSLAPGSGVVTKYIAKSGIQK | ELNQLGFSIVGYG | :   |
| AtACO2  | : VAKKASD   | IGIK | -----               | ----- | VKPWVKTSAPGSRVVEKYIDRSGLRES | ITKQGFIVGYG   | :   |
| AtACO3  | : VAKKACD   | IGIQ | -----               | ----- | VKPWIKTSLAPGSGVVTKYIAKSGIQE | YINEQGFINVGYG | :   |
| AtACO4  | : FHAAGRK   | VKVP | -----               | ----- | TEIVPATQKV                  | RMDEVYALPVPAG | :   |
| OsACO1  | : VAKKACE   | IGLE | -----               | ----- | VKPWIKTSLAPGSGVVKKYIDKSGIQK | YLDQLGFHIVGYG | :   |
| OsACO2  | : VAKKACE   | IGLE | GLPFRFRSKNRSSPVYRKQ | ----- | VKPWVKTSFTHGSAVTREYAKHSHLQD | YLNQQGFHLAAFG | :   |
| OsACO3  | : VAKKACE   | IGLE | -----               | ----- | VKPWVKTSAPGSGVVTKYILQSGIQE  | ELNKQGFHVGYG  | :   |
| OsACO4  | : FLASGKK   | VKVP | -----               | ----- | TEIVPATQKV                  | RMDIYSIPVPAG  | :   |
| GmACO1  | : VAKKAHE   | IGIQ | -----               | ----- | VNPWVKTSAPGSGVVTKYILQSGIQK  | YINEQGFIHVGFG | :   |
| GmACO2  | : VAKKAHE   | IGIQ | -----               | ----- | VKPWVKTSAPGSGVVTKYIAKSGIQK  | YLINEQGFIVGYG | :   |
| GmACO3  | :           |      | -----               | ----- |                             |               | :   |
| GmACO4  | : WMVIHLKTQ | IKG  | -----               | ----- | KEYTPRQGILHPRKHGISLSSP      |               | :   |
| GmACO5  | : FLASGKK   | VKVP | -----               | ----- | TEIVPATQKV                  | RMELYSLPVPAG  | :   |
| GmACO6  | : VLRNKR    |      | -----               | KT    |                             |               | :   |
| GmACO7  | : ALQNKG    |      | -----               | KT    |                             |               | :   |
| GmACO8  | : FLAGGKT   | VKVP | -----               | ----- | TEIVPATQKV                  | RMELYTLEVPDSG | :   |
| TaACO1  | : FLASGKK   | VKVP | -----               | ----- | TEIVPATQKV                  | RMDEVYSLPVPAG | :   |
| TaACO2  | : VAKKACE   | IGLE | -----               | ----- | VKPWVKTSAPGSLVVTKYIEHSGIQE  | YLNHQGFHIVGYG | :   |
| TaACO3  | : VAKKACE   | IGLE | -----               | ----- | VKPWVKTSAPGSLVVTKYIEHSGIQE  | YLNHQGFHIVGYG | :   |
| TaACO4  | : VAKKACE   | IGLE | -----               | ----- | VKPWVKTSAPGSLVVTKYIEHSGIQE  | YLNHQGFHIVGYG | :   |
| TaACO5  | : VAKKACE   | IGLE | -----               | ----- | VKPWVKTSAPGSLVVTKYIEHSGIQE  | YLNHQGFHIVGYG | :   |
| TaACO6  | : VAKKACD   | IGLE | -----               | ----- | VKPWIKTSLAPGSGVVKKYIDKSGIQK | YLNQLGFIVGYG  | :   |
| TaACO7  | : VAKKACD   | IGLE | -----               | ----- | VKPWIKTSLAPGSGVVKKYIDKSGIQK | YLNQLGFIVGYG  | :   |
| TaACO8  | : FLASGKK   | VKVP | -----               | ----- | TEIVPATQKV                  | RMDEVYSLPVPAG | :   |
| TaACO9  | : VAKKACE   | IGLE | -----               | ----- | VKPWVKTSAPGSGVVTKYIAKSGIQE  | YLNKQGFHIVGYG | :   |
| TaACO10 | : FLASGKK   | VKVP | -----               | ----- | TEIVPATQKV                  | RMDEVYSLPVPAG | :   |
| TaACO11 | : VAKKACE   | IGLE | -----               | ----- | VKPWVKTSAPGSGVVTKYIAKSGIQE  | YLNKQGFHIVGYG | :   |
| TaACO12 | : FLASGKK   | VKVP | -----               | ----- | TEIVPATQKV                  | RMDEVYSLPVPAG | :   |
| TaACO13 | : VAKKACE   | IGLE | -----               | ----- | VKPWVKTSAPGSGVVTKYIAKSGIQE  | YLNKQGFHIVGYG | :   |
| TaACO14 | : VAKKAYE   | IGLE | -----               | ----- | VKPWIKTSLAPGSGVVTKYILRSGLLK | YISDLGFIVGYG  | :   |
| TaACO15 | : VAKKAYE   | IGLE | -----               | ----- | VKPWIKTSLAPGSGVVTKYILRSGLLK | YISDLGFIVGYG  | :   |
| PpACO1  | : VAKKGTE   | IGLE | -----               | ----- | VKPWVKTSAPGSGVVTKYIAKSGITK  | YLNQQGFIVGYG  | :   |
| PpACO2  | : VAKKATE   | IGLE | -----               | ----- | VKPWVKTSAPGSGVVTKYIEKSGINK  | YLDKQGFIVGYG  | :   |
| PpACO3  | : VAKKATE   | IGLE | -----               | ----- | VKPWVKTSAPGSGVVTKYIEKSGINK  | YLDKQGFIVGYG  | :   |
| PpACO4  | : LAISGQK   | VKVP | -----               | ----- | TEIVPATQKV                  | RMELYSLPVPAG  | :   |
| PpACO5  | : VAKKATE   | IGLE | -----               | ----- | VKPWVKTSAPGSGVVTKYIEHSGINK  | YLDQQGFIVGYG  | :   |
| SdACO1  | : VAKKATE   | IGIQ | -----               | ----- | VKPWIKTSLAPGSGVVTKYIAKSGITE | YLDKQGFIVGYG  | :   |
| SdACO2  | : VAKKATE   | IGIQ | -----               | ----- | VKPWIKTSLAPGSGVVTKYIAKSGITE | YLDKQGFIVGYG  | :   |
| SdACO3  | : LNKAGQK   | VKVP | -----               | ----- | TEIVPATQKV                  | RMDEVYAMPPEAD | :   |
| SdACO4  | : LNKAGQK   | VKVP | -----               | ----- | TEIVPATQKV                  | RMDEVYAMPPEAD | :   |
| SdACO5  | : LNKAGQK   | VKVP | -----               | ----- | TEIVPATQKV                  | RMDEVYAMPPEAD | :   |
| SdACO6  | : VAKKATE   | IGLE | -----               | ----- | VRPWIKTSLAPGSGVVTKYIAKSGILK | YLDMQGFIVGYG  | :   |
| SdACO7  | : VAKKATE   | IGLE | -----               | ----- | VRPWIKTSLAPGSGVVTKYIAKSGILK | YLDMQGFIVGYG  | :   |



|         | * | 720                        | *              | 740                    | *     | 760          | *   |
|---------|---|----------------------------|----------------|------------------------|-------|--------------|-----|
| AtACO1  | : | CTTCIGNSGDIHEAVASAI        | VDND-IVAS      | AVISNNNFEGRVHPLTRAN    | ----- |              | :   |
| AtACO2  | : | CTTCIGNSGNLDPEVASA         | IEGTD-IIPA     | AVISNNNFEGRVHPQTRAN    | ----- |              | :   |
| AtACO3  | : | CTTCIGNSGEINESVGA          | AITEND-IVAA    | AVISNNNFEGRVHPLTRAN    | ----- |              | :   |
| AtACO4  | : | GKTCAQIFEEA-----           | GCDTPASPCG     | ACIGPRTYARINEP         | ----- |              | :   |
| OsACO1  | : | CTTCIGNSGELDET             | VSAISDND-IVAA  | AVISNNNFEGRVHALTRAN    | ----- |              | :   |
| OsACO2  | : | CATCVGNSGDLDES             | VSAITEND-IVSV  | AVISANNNFEGRVHPLTRAN   | ----- |              | :   |
| OsACO3  | : | CTTCIGNSGDLDES             | VSAISEND-VVAA  | AVISNNNFEGRVHPLTRAN    | ----- |              | :   |
| OsACO4  | : | GKTCSQIFEEA-----           | GCDTPASPCG     | ACIGPRTYARNNEP         | ----- |              | :   |
| GmACO1  | : | CTTCIGNSGELLES             | VASAISEND-IVAA | AVISNNNFEGRVHALTRAN    | ----- |              | :   |
| GmACO2  | : | CTTCIGNSGELDQS             | VASAISEND-IVAA | AVISNNNFEGRVHPLTRAN    | ----- |              | :   |
| GmACO3  | : | -----                      | -----          | -----                  | ----- |              | :   |
| GmACO4  | : | ---TGDHIFNQHSVEFAVGADNPESA | ICASLAT        | QLLETR-----            |       |              | :   |
| GmACO5  | : | GKTCSQIFEEA-----           | GCDTPASPCG     | ACIGPRTYARNNEPKARIIVDK | EWK   | KDVVDVRRVGDR | IIA |
| GmACO6  | : | -----                      | -----          | -----                  | ----- |              | :   |
| GmACO7  | : | -----                      | -----          | -----                  | ----- |              | :   |
| GmACO8  | : | GKTCSMIFEEA-----           | GCDPPASPCG     | ACIGPRTYGRINEP         | ----- |              | :   |
| TaACO1  | : | GKTCSQIFEEA-----           | GCDAPASPCG     | ACIGPRTYARNNEP         | ----- |              | :   |
| TaACO2  | : | CTTCIGNSGDLDKSL            | SDAIVDNDVVVV   | AVISNNNFEGRVHPLTRAN    | ----- |              | :   |
| TaACO3  | : | CTTCIGNSGDLDKSL            | SDAIVDND-VAVV  | AVISNNNFEGRVHPLTRAN    | ----- |              | :   |
| TaACO4  | : | CTTCIGNSGDLDKSL            | SDAIVDND-VVVV  | AVISNNNFEGRVHPLTRAN    | ----- |              | :   |
| TaACO5  | : | CTTCIGNSGDLDKSL            | SDAIVDND-VVVV  | AVISNNNFEGRVHPLTRAN    | ----- |              | :   |
| TaACO6  | : | CTTCIGNSGDLDES             | VAAAITDND-VVAA | AVISNNNFEGRVHALTRAN    | ----- |              | :   |
| TaACO7  | : | CTTCIGNSGDLDES             | VAAAITDND-VVAA | AVISNNNFEGRVHALTRAN    | ----- |              | :   |
| TaACO8  | : | GKTCSQIFEEA-----           | GCDTPASPCG     | ACIGPRTYARNNEP         | ----- |              | :   |
| TaACO9  | : | CTTCIGNSGELHES             | VSAITEND-VVAA  | AVISNNNFEGRVHPLTRAN    | ----- |              | :   |
| TaACO10 | : | GKTCSQIFEEA-----           | GCDTPASPCG     | ACIGPRTYARNNEP         | ----- |              | :   |
| TaACO11 | : | CTTCIGNSGELHES             | VSAITEND-VVAA  | AVISNNNFEGRVHPLTRAN    | ----- |              | :   |
| TaACO12 | : | GKTCSQIFEEA-----           | GCDTPASPCG     | ACIGPRTYARNNEP         | ----- |              | :   |
| TaACO13 | : | CTTCIGNSGELHES             | VSAITEND-VVAA  | AVISNNNFEGRVHPLTRAN    | ----- |              | :   |
| TaACO14 | : | CTTCIGNSGDLDQIV            | ADEITEND-IIAV  | AVISNNNFEGRIHPLTQAN    | ----- |              | :   |
| TaACO15 | : | CTTCIGNSGDLDQIV            | ADAITEND-IIAA  | AVISNNNFEGRIHPLTQAN    | ----- |              | :   |
| PpACO1  | : | CTTCIGNSGELHED             | VSKAITEND-IVAA | AVISNNNFEGRVHPLTRAN    | ----- |              | :   |
| PpACO2  | : | CTTCIGNSGDVHEA             | VAEAIAND-VVAA  | AVISNNNFEGRVHPLTRAN    | ----- |              | :   |
| PpACO3  | : | CTTCIGNSGDVHEA             | VAEAIAND-MVAA  | AVISNNNFEGRVHPLTRAN    | ----- |              | :   |
| PpACO4  | : | GKTCAEIFQQA-----           | GCDTPASPCG     | ACIGPRTYARNNDP         | ----- |              | :   |
| PpACO5  | : | CTTCIGNSGDLHED             | VSEAIAND-VVAA  | AVISNNNFEGRVHPLTRAN    | ----- |              | :   |
| SdACO1  | : | CTTCIGNSGEIHED             | VASAIADND-MIAA | AVISNNNFEGRIHPLTRAN    | ----- |              | :   |
| SdACO2  | : | CTTCIGNSGEIHED             | VASAIADND-MIAA | AVISNNNFEGRIHPLTRAN    | ----- |              | :   |
| SdACO3  | : | GKTCAQIFEEA-----           | GCDTPASPCG     | ACIGPRTYARNNEP         | ----- |              | :   |
| SdACO4  | : | GKTCAQIFEEA-----           | GCDTPTSPCG     | ACIGPKITLEK1           | ----- |              | :   |
| SdACO5  | : | GKTCAQIFEEA-----           | GCDTPASPCG     | ACIGPRTYARNNEP         | ----- |              | :   |
| SdACO6  | : | CTTCIGNSGELHEA             | VATAIADND-IVAA | AVISNNNFEGRVHPLTRAN    | ----- |              | :   |
| SdACO7  | : | CTTCIGNSGELHEA             | VATAIADND-IVAA | AVISNNNFEGRVHPLTRAN    | ----- |              | :   |



|         |   | *    | 860                | *            | 880            | *         | 900         | *            |       |       |
|---------|---|------|--------------------|--------------|----------------|-----------|-------------|--------------|-------|-------|
| AtACO1  | : | ---- | YLASPPLV           | AYALAGTVDIDF | ETQPIGTGKDGKQ  | IF        | FRDIWPSNKE  | VAE          | VVQSS | :     |
| AtACO2  | : | ---- | YLASPPLV           | AYALAGTVDIDF | EKEPIGTRSDGKS  | VY        | LRDWP       | SNEE         | VAQ   | VVQYS |
| AtACO3  | : | ---- | YLASPPLV           | AYALAGTVNIDF | ETETPIGKGNKGD  | VF        | LRDIWPTTE   | EIAE         | VVQSS | :     |
| AtACO4  | : | ---- |                    |              |                |           |             |              |       |       |
| OsACO1  | : | ---- | YLASPPLV           | AYALAGTVNIDF | EKEPIGISKDGKE  | VY        | FRDIWPS     | TEE          | IAE   | VVKSS |
| OsACO2  | : | ---- | YLASPPLV           | AYALAGTVDIDF | EKEPIGHGKDGNE  | VY        | LRDIWPTNEE  | IEE          | QV    | VVKSS |
| OsACO3  | : | ---- | YLASPPLV           | AYALAGTVDIDF | EKEPIGVGKDGKE  | VF        | FRDIWPS     | TEE          | IAE   | VVQSS |
| OsACO4  | : | ---- |                    |              |                |           |             |              |       |       |
| GmACO1  | : | ---- | YLASPPLV           | AYALAGTVDIDF | EKEPIGTGKDGKN  | VY        | LRDIWPS     | TEE          | IAK   | VVQSS |
| GmACO2  | : | ---- | YLASPPLV           | AYALAGTVDIDF | EKEPIGTGKGNN   | VY        | LRDIWPS     | TQ           | EIAE  | AVQSS |
| GmACO3  | : | ---- |                    |              |                |           |             |              |       |       |
| GmACO4  | : | ---- |                    |              |                |           |             |              |       |       |
| GmACO5  | : |      | FGLGEMNGEGKSILEFSE | ALDLS        | IANTWFKKRE     | DHLITYKSG | GTCSQIDFFLI | RKSDRKYCLNCK | VI    | PEE   |
| GmACO6  | : | ---- |                    |              |                |           |             |              |       |       |
| GmACO7  | : | ---- |                    |              |                |           |             |              |       |       |
| GmACO8  | : | ---- |                    |              |                |           |             |              |       |       |
| TaACO1  | : | ---- |                    |              |                |           |             |              |       |       |
| TaACO2  | : | ---- | YLASPPLV           | AYALAGTVDIDF | ENEPIGIGKDGKE  | VY        | FKDVWPTNEE  | IEE          | QVI   | KSN   |
| TaACO3  | : | ---- | YLASPPLV           | AYALAGTVDIDF | ENEPIGIGKDGKE  | VY        | FKDVWPTNEE  | IEE          | QVI   | KSN   |
| TaACO4  | : | ---- | YLASPPLV           | AYALAGTVDIDF | ENEPIGIGKDGKE  | VY        | FKDVWPTNEE  | IEE          | QVI   | KSN   |
| TaACO5  | : | ---- | YLASPPLV           | AYALAGTVDIDF | ENEPIGIGKDGKE  | VY        | FKDVWPTNEE  | IEE          | QVI   | KSN   |
| TaACO6  | : | ---- | YLASPPLV           | AYALAGTVNIDF | EKEPVGISKDGKE  | VF        | FRDIWPTTDE  | EIAE         | VVKAS | :     |
| TaACO7  | : | ---- | YLASPPLV           | AYALAGTVNIDF | EKEPVGISKDGKE  | VY        | FRDIWPTTDE  | EIAE         | VVKAS | :     |
| TaACO8  | : | ---- |                    |              |                |           |             |              |       |       |
| TaACO9  | : | ---- | YLASPPLV           | AYALAGTVDIDF | EKEPIGVGKDGKE  | VF        | FRDIWPTTE   | EIAE         | VVQSS | :     |
| TaACO10 | : | ---- |                    |              |                |           |             |              |       |       |
| TaACO11 | : | ---- | YLASPPLV           | AYALAGTVDIDF | EKEPIGVGKDGKE  | VF        | FRDIWPTTE   | EIAE         | VVQSS | :     |
| TaACO12 | : | ---- |                    |              |                |           |             |              |       |       |
| TaACO13 | : | ---- | YLASPPLV           | AYALAGTVDIDF | EKEPIGVGKDGKE  | VF        | FRDIWPTTE   | EIAE         | VVQSS | :     |
| TaACO14 | : | ---- | YLASPPLV           | VYALAGTVDINF | EEEEPIGTGKGNRP | IF        | LRDIWPSSE   | EVSE         | IVHSN | :     |
| TaACO15 | : | ---- | YLASPPLV           | VYALAGTVDINF | EEEEPIGTGKGNRP | IF        | LRDIWPS     | SKK          | VSE   | IVHSN |
| PpACO1  | : | ---- | YLASPPLV           | AYAFAGTVDIDF | AKEPIGKSKGGKD  | VF        | LKDVWPSNEE  | IAK          | VVQSS | :     |
| PpACO2  | : | ---- | YLASPPLV           | AYAFAGTVNIDF | EKDPIGVGKDGKN  | VF        | LRDIWPSNQ   | EVAE         | VVATS | :     |
| PpACO3  | : | ---- | YLASPPLV           | AYAFAGTVNIDF | EKDPIGVGKDGKN  | VF        | LRDIWPSNQ   | EVAE         | VVATS | :     |
| PpACO4  | : | ---- |                    |              |                |           |             |              |       |       |
| PpACO5  | : | ---- | YLASPPLV           | AYAFAGTVNIDF | ETETPIGLKDGKN  | VF        | LRDIWPS     | SDEV         | AE    | VVANA |
| SdACO1  | : | ---- | YLASPPLV           | AYALAGTVDIDF | DTEPIGVGKSGKE  | VF        | LRDIWPSSE   | EVAK         | VVEKA | :     |
| SdACO2  | : | ---- | YLASPPLV           | AYALAGTVDIDF | DTEPIGVGKSGKE  | VF        | LRDIWPSSE   | EVAK         | VVEKA | :     |
| SdACO3  | : | ---- |                    |              |                |           |             |              |       |       |
| SdACO4  | : | ---- |                    |              |                |           |             |              |       |       |
| SdACO5  | : | ---- |                    |              |                |           |             |              |       |       |
| SdACO6  | : | ---- | YLASPPLV           | AYALAGTVNIDF | EKEPIGVHSGKQ   | VF        | LRDIWPTSE   | EVAK         | VAEAS | :     |
| SdACO7  | : | ---- | YLASPPLV           | AYALAGTVNIDF | EKEPIGVHSGKQ   | VF        | LRDIWPTSE   | EVAK         | VAEAS | :     |

|         | 920                 | *                | 940        | *                 | 960     | *             | 980 |
|---------|---------------------|------------------|------------|-------------------|---------|---------------|-----|
| AtACO1  | : VLPDMFKATYEAITKGN | SMWNQLSVA--SGTL  | Y          | EWDPKSTYIHEPPYFKG | MTMSPPG | PH-----       | :   |
| AtACO2  | : VLPSMEKSSYETITEGN | PLWNELSAP--SSTL  | Y          | SWDPNSTYIHEPPYFKN | MTANPPG | PR-----       | :   |
| AtACO3  | : VLPDMFRATYESITKGN | PMWNKLSVP--ENTL  | Y          | SWDPNSTYIHEPPYFKD | MTMDPPG | PH-----       | :   |
| AtACO4  | :                   | -----            |            | -----             |         | -----         | :   |
| OsACO1  | : VLPDMFKSTYEAITKGN | PMWNELSVS--ASTL  | Y          | PWDPTSTYIHEPPYFKD | MTMSPPG | PR-----       | :   |
| OsACO2  | : VLPDMFTQTYESIKRCN | RRWNELRVPGEAAL   | Y          | PWDPSSTYIRKPPYLEG | MAMSPSR | PR-----       | :   |
| OsACO3  | : VLPDMFKSTYEAITKGN | PMWNQLTVP--EASL  | Y          | SWDPNSTYIHEPPYFKD | MTMSPPG | PH-----       | :   |
| OsACO4  | :                   | -----            |            | -----             |         | -----         | :   |
| GmACO1  | : VLPDMFRSTYEAITKGN | PMWNQLQVP--ADTL  | Y          | SWDPSTYIHEPPYFKS  | MTMDPPG | PH-----       | :   |
| GmACO2  | : VLPDMFRSTYEAITKGN | TMWNQLQVP--AETL  | Y          | SWDPKSTYIHEPPYFKG | MTMDPPG | AH-----       | :   |
| GmACO3  | :                   | -----            |            | -----             |         | -----         | :   |
| GmACO4  | :                   | -----            |            | -----             |         | -----         | :   |
| GmACO5  | : SLTTQHRVLVMDVRIR  | DRAKRRSPMVAPRIKW | HLKGEKQGIF | QQKIWEGWCGQS      | QS      | SANDLWNKMSQEI | :   |
| GmACO6  | :                   | -----            |            | -----             |         | -----         | :   |
| GmACO7  | :                   | -----            |            | -----             |         | -----         | :   |
| GmACO8  | :                   | -----            |            | -----             |         | -----         | :   |
| TaACO1  | :                   | -----            |            | -----             |         | -----         | :   |
| TaACO2  | : VLPKMEVDTYDSITEGN | DAWNKL VVP--KETL | Y          | PWDPKSTYIHKPAYLEN | ITMTPPG | PP-----       | :   |
| TaACO3  | : VLPKMEVDTYGSITEGN | DAWNKL VVP--KETL | Y          | PWDPKSTYIHKPAYLEN | ITMTPPG | PP-----       | :   |
| TaACO4  | : VLPKMEVDTYGSITEGN | DAWNKL VVP--KETL | Y          | PWDPKSTYIHKPAYLEN | ITMTPPG | PP-----       | :   |
| TaACO5  | : VLPKMEVDTYGSITEGN | DAWNKL VVP--KETL | Y          | PWDPKSTYIHKPAYLEN | ITMTPPG | PP-----       | :   |
| TaACO6  | : VLPDMFKGTYEAITKGN | PMWNELFVS--ASTL  | Y          | PWDPKSTYIHEPPYFKD | MTMTPPG | AR-----       | :   |
| TaACO7  | : VLPDMFKGTYEAITKGN | PMWNELFVS--ASTL  | Y          | PWDPKSTYIHEPPYFKD | MTMTPPG | AR-----       | :   |
| TaACO8  | :                   | -----            |            | -----             |         | -----         | :   |
| TaACO9  | : VLPDMFKSTYEAITKGN | PMWNQLFVP--EASL  | Y          | SWDSNSTYIHEPPYFKD | MTMSPPG | PH-----       | :   |
| TaACO10 | :                   | -----            |            | -----             |         | -----         | :   |
| TaACO11 | : VLPDMFKSTYEAITKGN | PMWNELFVP--EASL  | Y          | SWDSNSTYIHEPPYFKD | MTMSPPG | PH-----       | :   |
| TaACO12 | :                   | -----            |            | -----             |         | -----         | :   |
| TaACO13 | : VLPDMFKSTYEAITKGN | PMWNELFVP--EASL  | Y          | SWDSNSTYIHEPPYFKD | MTMSPPG | PH-----       | :   |
| TaACO14 | : VLVDMFKSTYEVITKGN | PMWNQL VVP--TTDV | Y          | SWDPNSTYIREPPFFKG | MSMDLPG | PH-----       | :   |
| TaACO15 | : VLVDMFKSTYEAITKGN | PMWNQL VVP--TADV | Y          | SWDPNSTYIREPPFFKG | MSMDLPG | PH-----       | :   |
| PpACO1  | : VLPDMFTSTYQAITKGN | QTWNSLPAP--SGSQ  | Y          | AWDSKSTYVHEPPFFQN | MPKAPP  | GK-----       | :   |
| PpACO2  | : VLPDMFQETYTITQGN  | TMWNL DVP--AGAQ  | Y          | AWDPNSTYVHEPPFFKT | MSKDPPG | GM-----       | :   |
| PpACO3  | : VLPDMFQETYTITQGN  | TMWNL DVP--AGAQ  | Y          | AWDPNSTYVHEPPFFKT | MSKDPPG | GM-----       | :   |
| PpACO4  | :                   | -----            |            | -----             |         | -----         | :   |
| PpACO5  | : VLPDMFRSTYKAITEGN | TMWNKLEAP--AGSQ  | Y          | AWDPKSTYVHDPFFFKT | MTKDPPG | GR-----       | :   |
| SdACO1  | : VVPDMFRSTYKTITKEN | KMWNNLSAP--SGAL  | Y          | AWDPSTYVHDPFFFKS  | MTEPPG  | VH-----       | :   |
| SdACO2  | : VVPDMFRSTYKTITKEN | KMWNNLSAP--SGAL  | Y          | AWDPSTYVHDPFFFKS  | MTEPPG  | VH-----       | :   |
| SdACO3  | :                   | -----            |            | -----             |         | -----         | :   |
| SdACO4  | :                   | -----            |            | -----             |         | -----         | :   |
| SdACO5  | :                   | -----            |            | -----             |         | -----         | :   |
| SdACO6  | : VLPDMFKSTYESITKGN | TMWNL DLPAP--TGD | Y          | SWDPKSTYIHEPPFFKT | MTRDPPG | VH-----       | :   |
| SdACO7  | : VLPDMFKSTYESITKGN | TMWNL DLPAP--TGD | Y          | SWDPKSTYIHEPPFFKT | MTRDPPG | VH-----       | :   |

```

          *      1000      *      1020      *      1040      *
AtACO1 : -----G V K D A Y C L I N F G D S I T T D H I S P A G S I H K D S P A A K Y L M E R G V D R - R D E N S Y G S R R G N D E I M A R :
AtACO2 : -----E V K D A Y C L I N F G D S V T T D H I S P A G N I Q K T S P A A K F L M D R G V I S - E D E N S Y G S R R G N D E V M A R :
AtACO3 : -----N V K D A Y C L I N F G D S I T T D H I S P A G N I Q K D S P A A K F L M E R G V D R - K D E N S Y G S R R G N D E I M A R :
AtACO4 : -----
OsACO1 : -----P V K D A Y C L I N F G D S I T T D H I S P A G S I H P D S P A A R Y L K E R G V E R - K D E N S Y G S R R G N D E I M A R :
OsACO2 : -----S V R D A Y C L I N L G D S V T T D H I S Y S G S I T P G S A A A E Y L R A A G V A D R E R L G S Y G G R R G N D E V V V R :
OsACO3 : -----G V K N A Y C L I N F G D S I T T D H I S P A G S I H K D S P A A K Y L L E R G V D R - K D E N S Y G S R R G N D E V M A R :
OsACO4 : -----
GmACO1 : -----G V K D A Y C L I N F G D S I T T D H I S P A G S I H K D S P A A K Y L V E H G V E R - K D E N S Y G S R R G N D E V M A R :
GmACO2 : -----G V K D A Y C L I N F G D S I T T D H I S P A G N I N K D S P A A K Y L L D R G V E Q - K D E N S Y G S R R G N D E V M A R :
GmACO3 : -----
GmACO4 : -----
GmACO5 : I K V A K E T L G E S R G F G P R G K E S W W W N E S V Q S K V R V K K E C F K E W S R C R N S E T W D K Y K I A R N E T K K A V S E A R A :
GmACO6 : -----
GmACO7 : -----
GmACO8 : -----
TaACO1 : -----
TaACO2 : -----S V K D A Y C L I S L G D S I T T D H I S P S G V I K P G T P A A K Y L L E R G V K P - E N F T T Y G S R R A N D E I V V R :
TaACO3 : -----S V K D A Y C L I S L G D N I T T D H I S P S G V I K P G T P A A K Y L L E R G V K P - E N F T T Y G S R R A N D E I V V R :
TaACO4 : -----S V K D A Y C L I S L G D S I T T D H I S P S G V I K P G T P A A K Y L L E R G V K P - E N F T T Y G S R R A N D E I V V R :
TaACO5 : -----S V K D A Y C L I S L G D S I T T D H I S P S G V I K P G T P A A K Y L L E R G V K P - E N F T T Y G S R R A N D E I V V R :
TaACO6 : -----P V K D A Y C L I N F G D S I T T D H I S P A G S I H P D S P A A K Y L K E R N V E R - K D E N S Y G S R R G N D E I M A R :
TaACO7 : -----P V K D A Y C L I N F G D S I T T D H I S P A G S I H P D S P A A K Y L K E R N V E R - K D E N S Y G S R R G N D E I M A R :
TaACO8 : -----
TaACO9 : -----A V K N A Y C L I N F G D S I T T D H I S P A G S I H R D S P A A K Y L L E R G V D R - K D E N S Y G S R R G N D E V M A R :
TaACO10 : -----
TaACO11 : -----A V K N A Y C L I N F G D S I T T D H I S P A G S I H R D S P A A K Y L L E R G V D R - K D E N S Y G S R R G N D E V M A R :
TaACO12 : -----
TaACO13 : -----A V K N A Y C L I N F G D S I T T D H I S P A G S I H R D S P A A K Y L L E R G V D R - K D E N S Y G S R R G N D E V M A R :
TaACO14 : -----S I K D A Y C L I S F G D C V T A D H I S P A G S I H K D S P A A K Y L V G H S V K H - R D E N S Y G S R R G N Y E V M M R :
TaACO15 : -----S I K D A Y C L I C F G D C V T T D H I S P A G S I H K D S P A A K Y L V D H S V K P - G D E N S Y G S R R G N Y E V M M R :
PpACO1 : -----P V K A A Y C L I N F G D S I T T D H I S P A G N I N K D S P A A K F L M D R G V Q K - K D E N S Y G S R R G N D E I M A R :
PpACO2 : -----S V K D A F C L I N F G D S I T T D H I S P A G N I N K D S P A A K Y L M D R G V E R - K D E N S Y G S R R G N D E I M V R :
PpACO3 : -----S V K D A F C L I N F G D S I T T D H I S P A G N I N K D S P A A K Y L M D R G V E R - K D E N S Y G S R R G N D E I M V R :
PpACO4 : -----
PpACO5 : -----S V K D A Y C L I N F G D S I T T D H I S P A G N I N K D S P A A R Y L M E R G V D R - R D E N S Y G S R R G N D E I M G R :
SdACO1 : -----G V K D A Y C I I N F G D S I T T D H I S P A G N I N K D S P A A R Y L M E R G V E K - K D E N S Y G S R R G N D E I M A R :
SdACO2 : -----G V K D A Y C I I N F G D S I T T D H I S P A G N I N K D S P A A R Y L M E R G V E K - K D E N S Y G S R R G N D E I M A R :
SdACO3 : -----
SdACO4 : -----
SdACO5 : -----
SdACO6 : -----G V H D A V L L I N L G D S I T T D H I S P A G S I H K D S P A A R Y L T E R G V E R - K D E N S Y G S R R G N D E V M V R :
SdACO7 : -----G V H D A V L L I N L G D S I T T D H I S P A G S I H K D S P A A R Y L M E R G V E R - K D E N S Y G S R R G N D E V M V R :

```

|         | 1060                   | *   | 1080            | *      | 1100           | *                      | 1120  |    |
|---------|------------------------|-----|-----------------|--------|----------------|------------------------|-------|----|
| AtACO1  | : GTFANIRIVNKHFLKGEVGP | KT  | VIHIPTGEKLSV    | FDAA   | MKYRNEGRDTII   | -----                  | LA    | :  |
| AtACO2  | : GTFANIRIVNKLKGEVGP   | NT  | VIHIPTGEKLSV    | FDAA   | SKYKTAEQDTII   | -----                  | LA    | :  |
| AtACO3  | : GTFANIRIVNKLINNGEVGP | KT  | VIHIPS          | GEKLSV | FDAA           | MRYKSSGEDTII           | ----- | LA |
| AtACO4  | :                      |     |                 |        |                |                        |       | :  |
| OsACO1  | : GTFANIRIVNKLFLKGEVGP | KT  | IIHIPS          | GEKLSV | FDAA           | TKYKNEGHD              | II    | :  |
| OsACO2  | : GAFANIRIVNKLINNGKVGP | KT  | VIHVPTGEELCV    | FDAA   | IKYKSEGHNM     | VI                     |       | :  |
| OsACO3  | : GTFANIRIVNKLFLNGEVGP | KT  | VIHVPTGEKLYV    | FDAA   | ALKYKSEGHDT    | IV                     |       | :  |
| OsACO4  | :                      |     |                 |        |                |                        |       | :  |
| GmACO1  | : GTFANIRIVNKLINNGEVGP | KT  | IIHIPTGEKLYV    | FDAA   | TRFRE          | -----                  |       | :  |
| GmACO2  | : GTFANIRIVNKLINNGEVGP | KT  | VIHIPTGEKLYV    | FDAA   | QRYKAEGQDT     | IV                     |       | :  |
| GmACO3  | :                      |     |                 |        |                |                        |       | :  |
| GmACO4  | :                      |     |                 |        |                |                        |       | :  |
| GmACO5  | : QAFDGLYQALGTRD       | GER | SIYRLAKGRERKTRD | LD     | QVKCVKDEEGKVLV | HEKDIKERWKAYFHNLFNDGYG |       | :  |
| GmACO6  | :                      |     |                 |        |                |                        |       | :  |
| GmACO7  | :                      |     |                 |        |                |                        |       | :  |
| GmACO8  | :                      |     |                 |        |                |                        |       | :  |
| TaACO1  | :                      |     |                 |        |                |                        |       | :  |
| TaACO2  | : GAFANIRIVNKLLEGEVGP  | KT  | VIHVPTGEKHYV    | FDAA   | MKYKSEGHDM     | VI                     |       | :  |
| TaACO3  | : GAFANIRIVNKLLEGEVGP  | KT  | VIHVPTGEKHYV    | FDAA   | MKYKSEGHDM     | VI                     |       | :  |
| TaACO4  | : GAFANIRIVNKLLEGEVGP  | KT  | VIHVPTGEKHYV    | FDAA   | MKYKSEGHDM     | VI                     |       | :  |
| TaACO5  | : GAFANIRIVNKLLEGEVGP  | KT  | VIHVPTGEKHYV    | FDAA   | MKYKSEGHDM     | VI                     |       | :  |
| TaACO6  | : GTFANIRIVNKLFLKGEVGP | KT  | VIHVPSGEKLA     | V      | FDAA           | MKYKNEGHD              | II    | :  |
| TaACO7  | : GTFANIRIVNKLFLKGEVGP | QT  | IIHVPSGEKLA     | V      | FDAA           | MKYKNEGHD              | II    | :  |
| TaACO8  | :                      |     |                 |        |                |                        |       | :  |
| TaACO9  | : GTFANIRIVNKLFLGGEVGP | KT  | IIHVPTGEKLSV    | FDAA   | TKYKSEGHDT     | II                     |       | :  |
| TaACO10 | :                      |     |                 |        |                |                        |       | :  |
| TaACO11 | : GTFANIRIVNKLFLGGEVGP | KT  | IIHVPTGEKLSV    | FDAA   | TKYKSEGHDT     | II                     |       | :  |
| TaACO12 | :                      |     |                 |        |                |                        |       | :  |
| TaACO13 | : GTFANIRIVNKLFLGGEVGP | KT  | IIHVPTGEKLSV    | FDAA   | TKYKSEGHDT     | II                     |       | :  |
| TaACO14 | : GTFGNIRIVNKLLDGEPGP  | KT  | IIHIPTREKLYV    | YDA    | AMRYKNDGQDT    | IV                     |       | :  |
| TaACO15 | : GTFGNIRIVNKLLDGEPGP  | KT  | IIHVPTREKLYV    | YDA    | AMRYKNDGQDT    | IV                     |       | :  |
| PpACO1  | : GTFANIRIVNKLFLGGEVGP | KT  | IIHVPSKERLF     | I      | YDA            | AKKYKDEGHDT            | II    | :  |
| PpACO2  | : GTFANIRIVNKLFLKGEVGP | KT  | VIHVPTQEKMF     | I      | YDA            | AMKYKEEGHDT            | II    | :  |
| PpACO3  | : GTFANIRIVNKLFLKGEVGP | KT  | VIHVPTQEKMF     | I      | YDA            | AMKYKEEGHDT            | II    | :  |
| PpACO4  | :                      |     |                 |        |                |                        |       | :  |
| PpACO5  | : GTFANIRIVNKLFLKGEVGP | KT  | IIHVPTQEKMF     | I      | YDA            | QKYKAEGHDT             | II    | :  |
| SdACO1  | : GTFANIRIVNKLFLKGEVGP | KT  | IIHIPS          | GEKLSV | FDAA           | KKYQDEGHDT             | II    | :  |
| SdACO2  | : GTFANIRIVNKLFLKGEVGP | KT  | IIHIPS          | GEKLSV | FDAA           | KKYQDEGHDT             | II    | :  |
| SdACO3  | :                      |     |                 |        |                |                        |       | :  |
| SdACO4  | :                      |     |                 |        |                |                        |       | :  |
| SdACO5  | :                      |     |                 |        |                |                        |       | :  |
| SdACO6  | : GTFANIRIVNKLFLKGEVGP | KT  | VIHLPSGECHW     | V      | YDA            | QKYKDEGKEM             | VV    | :  |
| SdACO7  | : GTFANIRIVNKLFLKGEVGP | KT  | VIHLPSGECHW     | V      | YDA            | QKYKDEGKEM             | VV    | :  |



|         |   | *     | 1140 | *  | 1160 | *  | 1180 | *  |    |    |    |    |       |   |    |    |    |   |    |    |    |    |    |    |    |    |    |    |    |    |    |       |    |       |       |       |   |   |       |       |    |   |   |   |   |   |    |    |    |   |   |   |   |   |       |   |       |   |   |   |   |   |   |   |   |   |   |   |   |   |  |   |
|---------|---|-------|------|----|------|----|------|----|----|----|----|----|-------|---|----|----|----|---|----|----|----|----|----|----|----|----|----|----|----|----|----|-------|----|-------|-------|-------|---|---|-------|-------|----|---|---|---|---|---|----|----|----|---|---|---|---|---|-------|---|-------|---|---|---|---|---|---|---|---|---|---|---|---|---|--|---|
| AtACO1  | : | GA    | EY   | GS | SS   | RD | WA   | AK | GP | ML | LG | VK | AV    | I | SK | SF | ER | I | HR | SN | LV | GM | GI | IP | LC | FK | AG | ED | AE | T  | LG | ----- | :  |       |       |       |   |   |       |       |    |   |   |   |   |   |    |    |    |   |   |   |   |   |       |   |       |   |   |   |   |   |   |   |   |   |   |   |   |   |  |   |
| AtACO2  | : | GA    | EY   | GS | SS   | RD | WA   | AK | GP | LL | LG | VK | AV    | I | AK | SF | ER | I | HR | SN | LV | GM | GI | IP | LC | FK | AG | ED | AE | T  | LG | ----- | :  |       |       |       |   |   |       |       |    |   |   |   |   |   |    |    |    |   |   |   |   |   |       |   |       |   |   |   |   |   |   |   |   |   |   |   |   |   |  |   |
| AtACO3  | : | GA    | EY   | GS | SS   | RD | WA   | AK | GP | ML | QG | VK | AV    | I | AK | SF | ER | I | HR | SN | LV | GM | GI | IP | LC | FK | SG | ED | AD | T  | LG | ----- | :  |       |       |       |   |   |       |       |    |   |   |   |   |   |    |    |    |   |   |   |   |   |       |   |       |   |   |   |   |   |   |   |   |   |   |   |   |   |  |   |
| AtACO4  | : | ----- |      |    |      |    |      |    |    |    |    |    |       |   |    |    |    |   |    |    |    |    |    |    |    |    |    |    |    | :  |    |       |    |       |       |       |   |   |       |       |    |   |   |   |   |   |    |    |    |   |   |   |   |   |       |   |       |   |   |   |   |   |   |   |   |   |   |   |   |   |  |   |
| OsACO1  | : | GA    | EY   | GS | SS   | RD | WA   | AK | GP | ML | QG | VK | AV    | I | AK | SF | ER | I | HR | SN | LV | GM | GI | IP | LC | FK | SG | ED | AD | T  | LG | ----- | :  |       |       |       |   |   |       |       |    |   |   |   |   |   |    |    |    |   |   |   |   |   |       |   |       |   |   |   |   |   |   |   |   |   |   |   |   |   |  |   |
| OsACO2  | : | GA    | EY   | GS | SS   | RD | SA   | AK | GP | ML | LI | MI | ----- |   |    |    |    |   |    |    |    |    |    |    |    |    |    |    |    |    | :  |       |    |       |       |       |   |   |       |       |    |   |   |   |   |   |    |    |    |   |   |   |   |   |       |   |       |   |   |   |   |   |   |   |   |   |   |   |   |   |  |   |
| OsACO3  | : | GA    | EY   | GS | SS   | RD | WA   | AK | GP | ML | LG | VK | AV    | I | AK | SF | ER | I | HR | SN | LV | GM | GI | IP | LC | FK | AG | ED | AD | SL | LG | ----- | :  |       |       |       |   |   |       |       |    |   |   |   |   |   |    |    |    |   |   |   |   |   |       |   |       |   |   |   |   |   |   |   |   |   |   |   |   |   |  |   |
| OsACO4  | : | ----- |      |    |      |    |      |    |    |    |    |    |       |   |    |    |    |   |    |    |    |    |    |    |    |    |    |    |    | :  |    |       |    |       |       |       |   |   |       |       |    |   |   |   |   |   |    |    |    |   |   |   |   |   |       |   |       |   |   |   |   |   |   |   |   |   |   |   |   |   |  |   |
| GmACO1  | : | -     | CL   | Y  | DK   | I  | SS   | K  | C  | Y  | I  | C  | N     | - | -  | I  | S  | V | F  | P  | L  | C  | I  | N  | Y  | R  | V  | L  | F  | V  | Q  | I     | D  | N     | T     | K     | G | M | ----- | :     |    |   |   |   |   |   |    |    |    |   |   |   |   |   |       |   |       |   |   |   |   |   |   |   |   |   |   |   |   |   |  |   |
| GmACO2  | : | GA    | EY   | GS | SS   | RD | WA   | AK | GP | ML | LG | VK | AV    | I | AK | SF | ER | I | HR | SN | LV | GM | GI | V  | P  | L  | C  | FK | SG | ED | AD | T     | LG | ----- | :     |       |   |   |       |       |    |   |   |   |   |   |    |    |    |   |   |   |   |   |       |   |       |   |   |   |   |   |   |   |   |   |   |   |   |   |  |   |
| GmACO3  | : | ----- |      |    |      |    |      |    |    |    |    |    |       |   |    |    |    |   |    |    |    |    |    |    |    |    |    |    |    | :  |    |       |    |       |       |       |   |   |       |       |    |   |   |   |   |   |    |    |    |   |   |   |   |   |       |   |       |   |   |   |   |   |   |   |   |   |   |   |   |   |  |   |
| GmACO4  | : | ----- |      |    |      |    |      |    |    |    |    |    |       |   |    |    |    |   |    |    |    |    |    |    |    |    |    |    |    | :  |    |       |    |       |       |       |   |   |       |       |    |   |   |   |   |   |    |    |    |   |   |   |   |   |       |   |       |   |   |   |   |   |   |   |   |   |   |   |   |   |  |   |
| GmACO5  | : | Y     | D    | S  | S    | S  | L    | D  | T  | R  | E  | E  | D     | R | N  | Y  | K  | Y | R  | R  | I  | Q  | K  | Q  | E  | V  | K  | E  | A  | L  | K  | R     | M  | S     | N     | G     | K | A | V     | G     | P  | D | N | I | P | I | E  | V  | W  | K | T | L | G | D | R     | G | L     | E | W | L | T | K | L | F | N | E | I | M | R | S |  | : |
| GmACO6  | : | ----- |      |    |      |    |      |    |    |    |    |    |       |   |    |    |    |   |    |    |    |    |    |    |    |    |    |    |    | :  |    |       |    |       |       |       |   |   |       |       |    |   |   |   |   |   |    |    |    |   |   |   |   |   |       |   |       |   |   |   |   |   |   |   |   |   |   |   |   |   |  |   |
| GmACO7  | : | ----- |      |    |      |    |      |    |    |    |    |    |       |   |    |    |    |   |    |    |    |    |    |    |    |    |    |    |    | :  |    |       |    |       |       |       |   |   |       |       |    |   |   |   |   |   |    |    |    |   |   |   |   |   |       |   |       |   |   |   |   |   |   |   |   |   |   |   |   |   |  |   |
| GmACO8  | : | ----- |      |    |      |    |      |    |    |    |    |    |       |   |    |    |    |   |    |    |    |    |    |    |    |    |    |    |    | :  |    |       |    |       |       |       |   |   |       |       |    |   |   |   |   |   |    |    |    |   |   |   |   |   |       |   |       |   |   |   |   |   |   |   |   |   |   |   |   |   |  |   |
| TaACO1  | : | ----- |      |    |      |    |      |    |    |    |    |    |       |   |    |    |    |   |    |    |    |    |    |    |    |    |    |    |    | :  |    |       |    |       |       |       |   |   |       |       |    |   |   |   |   |   |    |    |    |   |   |   |   |   |       |   |       |   |   |   |   |   |   |   |   |   |   |   |   |   |  |   |
| TaACO2  | : | G     | D    | E  | Y    | G  | A    | G  | S  | S  | R  | D  | S     | A | A  | K  | G  | P | L  | L  | G  | V  | K  | A  | V  | I  | A  | K  | G  | F  | E  | R     | I  | H     | R     | S     | N | L | V     | GM    | GI | I | P | L | R | F | K  | A  | G  | E | D | A | D | S | I     | N | ----- | : |   |   |   |   |   |   |   |   |   |   |   |   |  |   |
| TaACO3  | : | D     | D    | E  | Y    | G  | A    | G  | S  | S  | R  | D  | S     | A | A  | K  | G  | P | L  | L  | G  | V  | K  | A  | V  | I  | A  | K  | G  | F  | E  | R     | I  | H     | R     | S     | N | L | V     | GM    | GI | I | P | L | R | F | K  | V  | G  | E | D | A | D | S | I     | N | ----- | : |   |   |   |   |   |   |   |   |   |   |   |   |  |   |
| TaACO4  | : | G     | D    | E  | Y    | G  | A    | G  | S  | S  | R  | D  | S     | A | A  | K  | G  | P | L  | L  | G  | V  | K  | A  | V  | I  | A  | K  | G  | F  | E  | R     | I  | H     | R     | S     | N | L | V     | GM    | GI | I | P | L | R | F | K  | V  | G  | E | D | A | D | S | I     | N | ----- | : |   |   |   |   |   |   |   |   |   |   |   |   |  |   |
| TaACO5  | : | G     | D    | E  | Y    | G  | A    | G  | S  | S  | R  | D  | S     | A | A  | K  | G  | P | L  | L  | G  | V  | K  | A  | V  | I  | A  | K  | G  | F  | E  | R     | I  | H     | R     | S     | N | L | V     | GM    | GI | I | P | L | R | F | K  | A  | G  | E | D | A | D | S | I     | N | ----- | : |   |   |   |   |   |   |   |   |   |   |   |   |  |   |
| TaACO6  | : | GA    | EY   | GS | SS   | RD | WA   | AK | GP | ML | QG | VK | AV    | I | AK | SF | ER | I | HR | SN | LV | GM | GI | V  | P  | L  | C  | FK | AG | ED | AD | SL    | LG | ----- | :     |       |   |   |       |       |    |   |   |   |   |   |    |    |    |   |   |   |   |   |       |   |       |   |   |   |   |   |   |   |   |   |   |   |   |   |  |   |
| TaACO7  | : | GA    | EY   | GS | SS   | RD | WA   | AK | GP | ML | QG | VK | AV    | I | AK | SF | ER | I | HR | SN | LV | GM | GI | V  | P  | L  | C  | FK | AG | ED | AD | T     | LG | ----- | :     |       |   |   |       |       |    |   |   |   |   |   |    |    |    |   |   |   |   |   |       |   |       |   |   |   |   |   |   |   |   |   |   |   |   |   |  |   |
| TaACO8  | : | ----- |      |    |      |    |      |    |    |    |    |    |       |   |    |    |    |   |    |    |    |    |    |    |    |    |    |    |    | :  |    |       |    |       |       |       |   |   |       |       |    |   |   |   |   |   |    |    |    |   |   |   |   |   |       |   |       |   |   |   |   |   |   |   |   |   |   |   |   |   |  |   |
| TaACO9  | : | GA    | EY   | GS | SS   | RD | WA   | AK | GP | ML | LG | VK | AV    | I | SK | SF | ER | I | HR | SN | LV | GM | GI | I  | P  | L  | C  | FK | AG | ED | AD | SL    | LG | ----- | :     |       |   |   |       |       |    |   |   |   |   |   |    |    |    |   |   |   |   |   |       |   |       |   |   |   |   |   |   |   |   |   |   |   |   |   |  |   |
| TaACO10 | : | ----- |      |    |      |    |      |    |    |    |    |    |       |   |    |    |    |   |    |    |    |    |    |    |    |    |    |    |    | :  |    |       |    |       |       |       |   |   |       |       |    |   |   |   |   |   |    |    |    |   |   |   |   |   |       |   |       |   |   |   |   |   |   |   |   |   |   |   |   |   |  |   |
| TaACO11 | : | GA    | EY   | GS | SS   | RD | WA   | AK | GP | ML | LG | VK | AV    | I | AK | SF | ER | I | HR | SN | LV | GM | GI | I  | P  | M  | C  | F  | K  | AG | ED | AD    | SL | LG    | ----- | :     |   |   |       |       |    |   |   |   |   |   |    |    |    |   |   |   |   |   |       |   |       |   |   |   |   |   |   |   |   |   |   |   |   |   |  |   |
| TaACO12 | : | ----- |      |    |      |    |      |    |    |    |    |    |       |   |    |    |    |   |    |    |    |    |    |    |    |    |    |    |    | :  |    |       |    |       |       |       |   |   |       |       |    |   |   |   |   |   |    |    |    |   |   |   |   |   |       |   |       |   |   |   |   |   |   |   |   |   |   |   |   |   |  |   |
| TaACO13 | : | GA    | EY   | GS | SS   | RD | WA   | AK | GP | ML | LG | VK | AV    | I | SK | SF | ER | I | HR | SN | LV | GM | GI | I  | P  | L  | C  | FK | AG | ED | AD | SL    | LG | ----- | :     |       |   |   |       |       |    |   |   |   |   |   |    |    |    |   |   |   |   |   |       |   |       |   |   |   |   |   |   |   |   |   |   |   |   |   |  |   |
| TaACO14 | : | G     | S    | K  | Y    | G  | T    | G  | S  | S  | R  | D  | W     | A | K  | G  | T  | M | L  | L  | G  | V  | K  | A  | V  | I  | A  | K  | S  | F  | E  | R     | I  | H     | R     | S     | N | L | V     | GM    | G  | V | I | P | L | C | FK | SG | ED | M | D | S | I | G | ----- | : |       |   |   |   |   |   |   |   |   |   |   |   |   |   |  |   |
| TaACO15 | : | G     | S    | E  | Y    | G  | T    | G  | S  | S  | R  | D  | W     | A | K  | R  | T  | M | L  | L  | G  | V  | K  | A  | V  | I  | A  | K  | S  | S  | E  | R     | I  | H     | ----- |       |   |   |       |       |    |   |   |   |   |   | :  |    |    |   |   |   |   |   |       |   |       |   |   |   |   |   |   |   |   |   |   |   |   |   |  |   |
| PpACO1  | : | GA    | EY   | GS | SS   | RD | WA   | AK | GP | YL | QG | VK | AV    | I | SK | SF | ER | I | HR | SN | LV | GM | G  | L  | I  | P  | L  | C  | FK | Q  | G  | Q     | D  | A     | D     | S     | I | G | ----- | :     |    |   |   |   |   |   |    |    |    |   |   |   |   |   |       |   |       |   |   |   |   |   |   |   |   |   |   |   |   |   |  |   |
| PpACO2  | : | GA    | EY   | GS | SS   | RD | WA   | AK | GP | YL | QG | VK | AV    | I | AK | SF | ER | I | HR | SN | LV | GM | G  | L  | I  | P  | L  | C  | F  | K  | E  | G     | E  | D     | A     | E     | T | L | G     | ----- | :  |   |   |   |   |   |    |    |    |   |   |   |   |   |       |   |       |   |   |   |   |   |   |   |   |   |   |   |   |   |  |   |
| PpACO3  | : | GA    | EY   | GS | SS   | RD | WA   | AK | GP | YM | QG | VK | AV    | I | AK | SF | ER | I | HR | SN | LV | GM | G  | L  | I  | P  | L  | C  | F  | K  | E  | G     | E  | D     | A     | E     | T | L | G     | ----- | :  |   |   |   |   |   |    |    |    |   |   |   |   |   |       |   |       |   |   |   |   |   |   |   |   |   |   |   |   |   |  |   |
| PpACO4  | : | ----- |      |    |      |    |      |    |    |    |    |    |       |   |    |    |    |   |    |    |    |    |    |    |    |    |    |    |    | :  |    |       |    |       |       |       |   |   |       |       |    |   |   |   |   |   |    |    |    |   |   |   |   |   |       |   |       |   |   |   |   |   |   |   |   |   |   |   |   |   |  |   |
| PpACO5  | : | GA    | EY   | GS | SS   | RD | WA   | AK | GP | YL | QG | VK | AV    | I | AK | SF | ER | I | HR | SN | LV | GM | G  | L  | I  | P  | L  | C  | F  | R  | N  | G     | E  | D     | A     | D     | S | I | G     | ----- | :  |   |   |   |   |   |    |    |    |   |   |   |   |   |       |   |       |   |   |   |   |   |   |   |   |   |   |   |   |   |  |   |
| SdACO1  | : | GA    | EY   | GS | SS   | RD | WA   | AK | GP | YL | QG | VK | AV    | I | AK | SF | ER | I | HR | SN | LV | GM | GI | I  | P  | L  | C  | FK | SG | ED | A  | E     | S  | L     | G     | ----- | : |   |       |       |    |   |   |   |   |   |    |    |    |   |   |   |   |   |       |   |       |   |   |   |   |   |   |   |   |   |   |   |   |   |  |   |
| SdACO2  | : | GA    | EY   | GS | SS   | RD | WA   | AK | GP | YL | QG | VK | AV    | I | AK | SF | ER | I | HR | SN | LV | GM | GI | I  | P  | L  | C  | FK | SG | ED | A  | E     | S  | L     | G     | ----- | : |   |       |       |    |   |   |   |   |   |    |    |    |   |   |   |   |   |       |   |       |   |   |   |   |   |   |   |   |   |   |   |   |   |  |   |
| SdACO3  | : | ----- |      |    |      |    |      |    |    |    |    |    |       |   |    |    |    |   |    |    |    |    |    |    |    |    |    |    |    | :  |    |       |    |       |       |       |   |   |       |       |    |   |   |   |   |   |    |    |    |   |   |   |   |   |       |   |       |   |   |   |   |   |   |   |   |   |   |   |   |   |  |   |
| SdACO4  | : | ----- |      |    |      |    |      |    |    |    |    |    |       |   |    |    |    |   |    |    |    |    |    |    |    |    |    |    |    | :  |    |       |    |       |       |       |   |   |       |       |    |   |   |   |   |   |    |    |    |   |   |   |   |   |       |   |       |   |   |   |   |   |   |   |   |   |   |   |   |   |  |   |
| SdACO5  | : | ----- |      |    |      |    |      |    |    |    |    |    |       |   |    |    |    |   |    |    |    |    |    |    |    |    |    |    |    | :  |    |       |    |       |       |       |   |   |       |       |    |   |   |   |   |   |    |    |    |   |   |   |   |   |       |   |       |   |   |   |   |   |   |   |   |   |   |   |   |   |  |   |
| SdACO6  | : | GA    | EY   | GS | SS   | RD | WA   | AK | GP | FL | QG | VK | AV    | I | SK | SF | ER | I | HR | SN | LV | GM | S  | I  | I  | P  | L  | C  | Y  | K  | N  | G     | E  | D     | A     | E     | S | L | G     | ----- | :  |   |   |   |   |   |    |    |    |   |   |   |   |   |       |   |       |   |   |   |   |   |   |   |   |   |   |   |   |   |  |   |
| SdACO7  | : | GA    | EY   | GS | SS   | RD | WA   | AK | GP | FL | QG | VK | AV    | I | SK | SF | ER | I | HR | SN | LV | GM | S  | I  | I  | P  | L  | C  | Y  | K  | N  | G     | E  | D     | A     | E     | S | L | G     | ----- | :  |   |   |   |   |   |    |    |    |   |   |   |   |   |       |   |       |   |   |   |   |   |   |   |   |   |   |   |   |   |  |   |

**B**

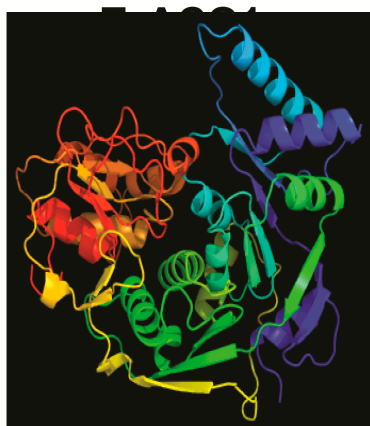

**TaACO4**

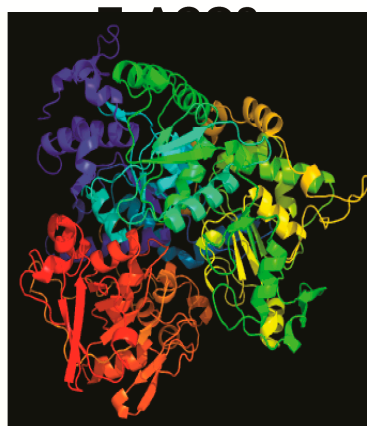

**TaACO5**

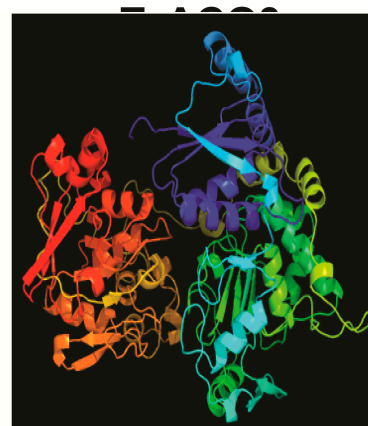

**TaACO6**

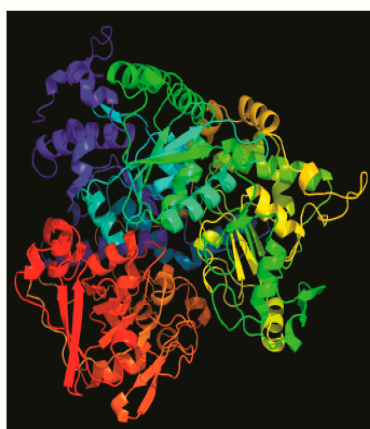

**TaACO7**

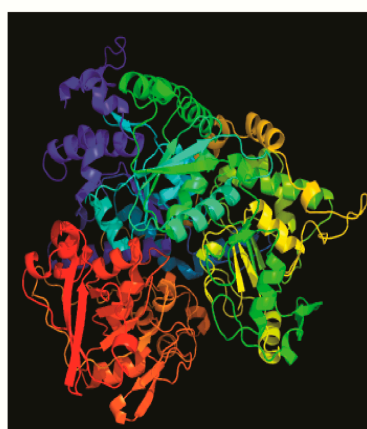

**TaACO8**

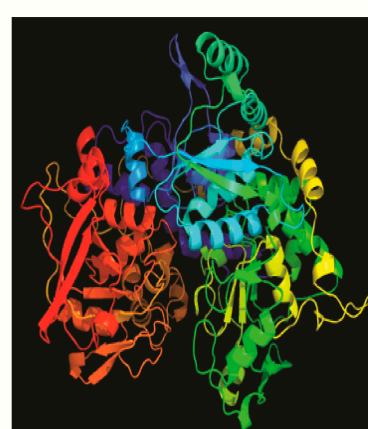

**TaACO9**

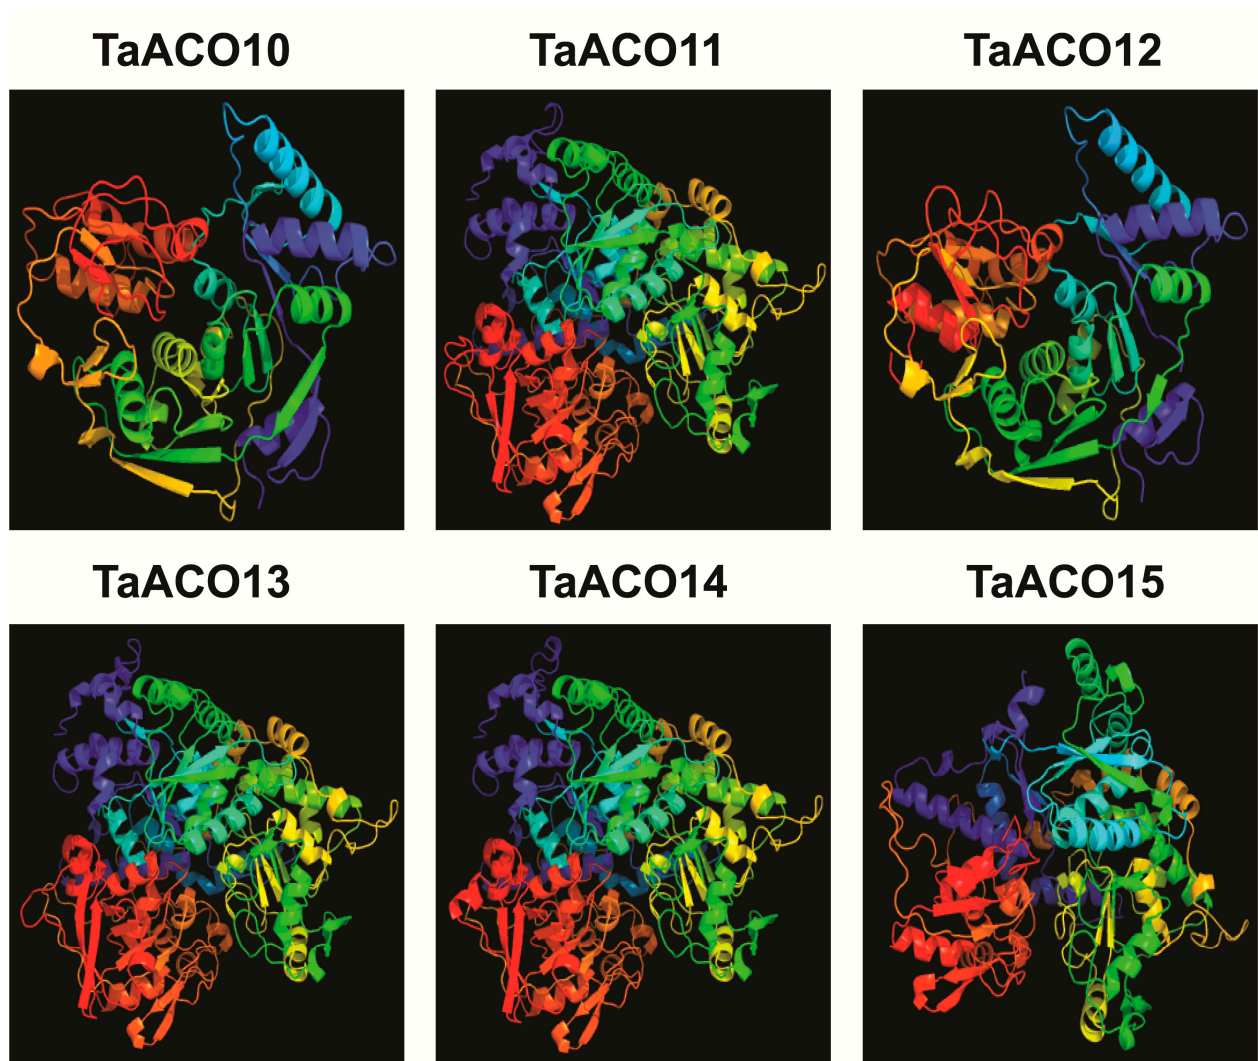

**Figure S8.** Alignment and 3-dimensional structure of the TaACO protein sequences. **A.** The aconitase domain is underlined with red color. Colored and shaded amino acids are chemically similar residues. Dashes indicate gaps introduced to maximize the alignment of the homologous region. **B.** Predicted 3D structures TaACO proteins.

A

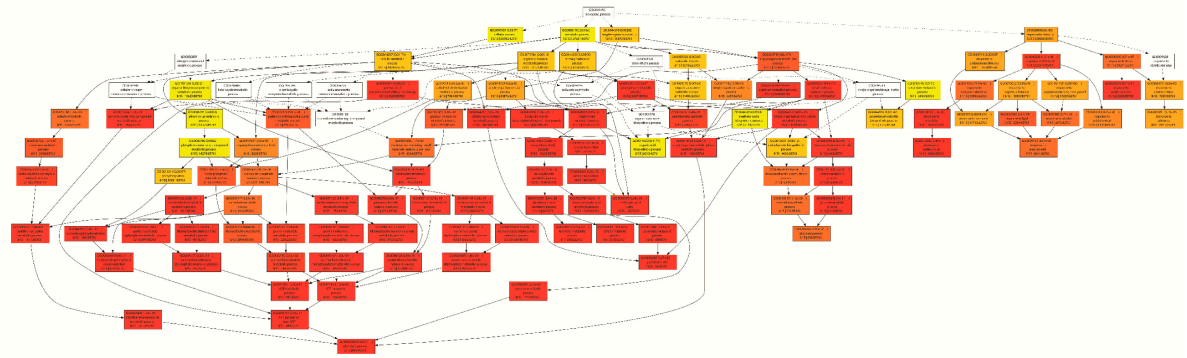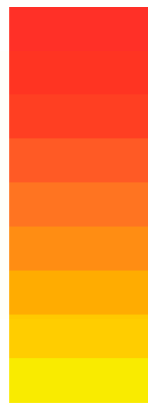

Level9  
Level8  
Level7  
Level6  
Level5  
Level4  
Level3  
Level2  
Level1

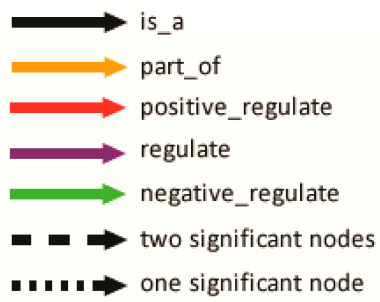



B

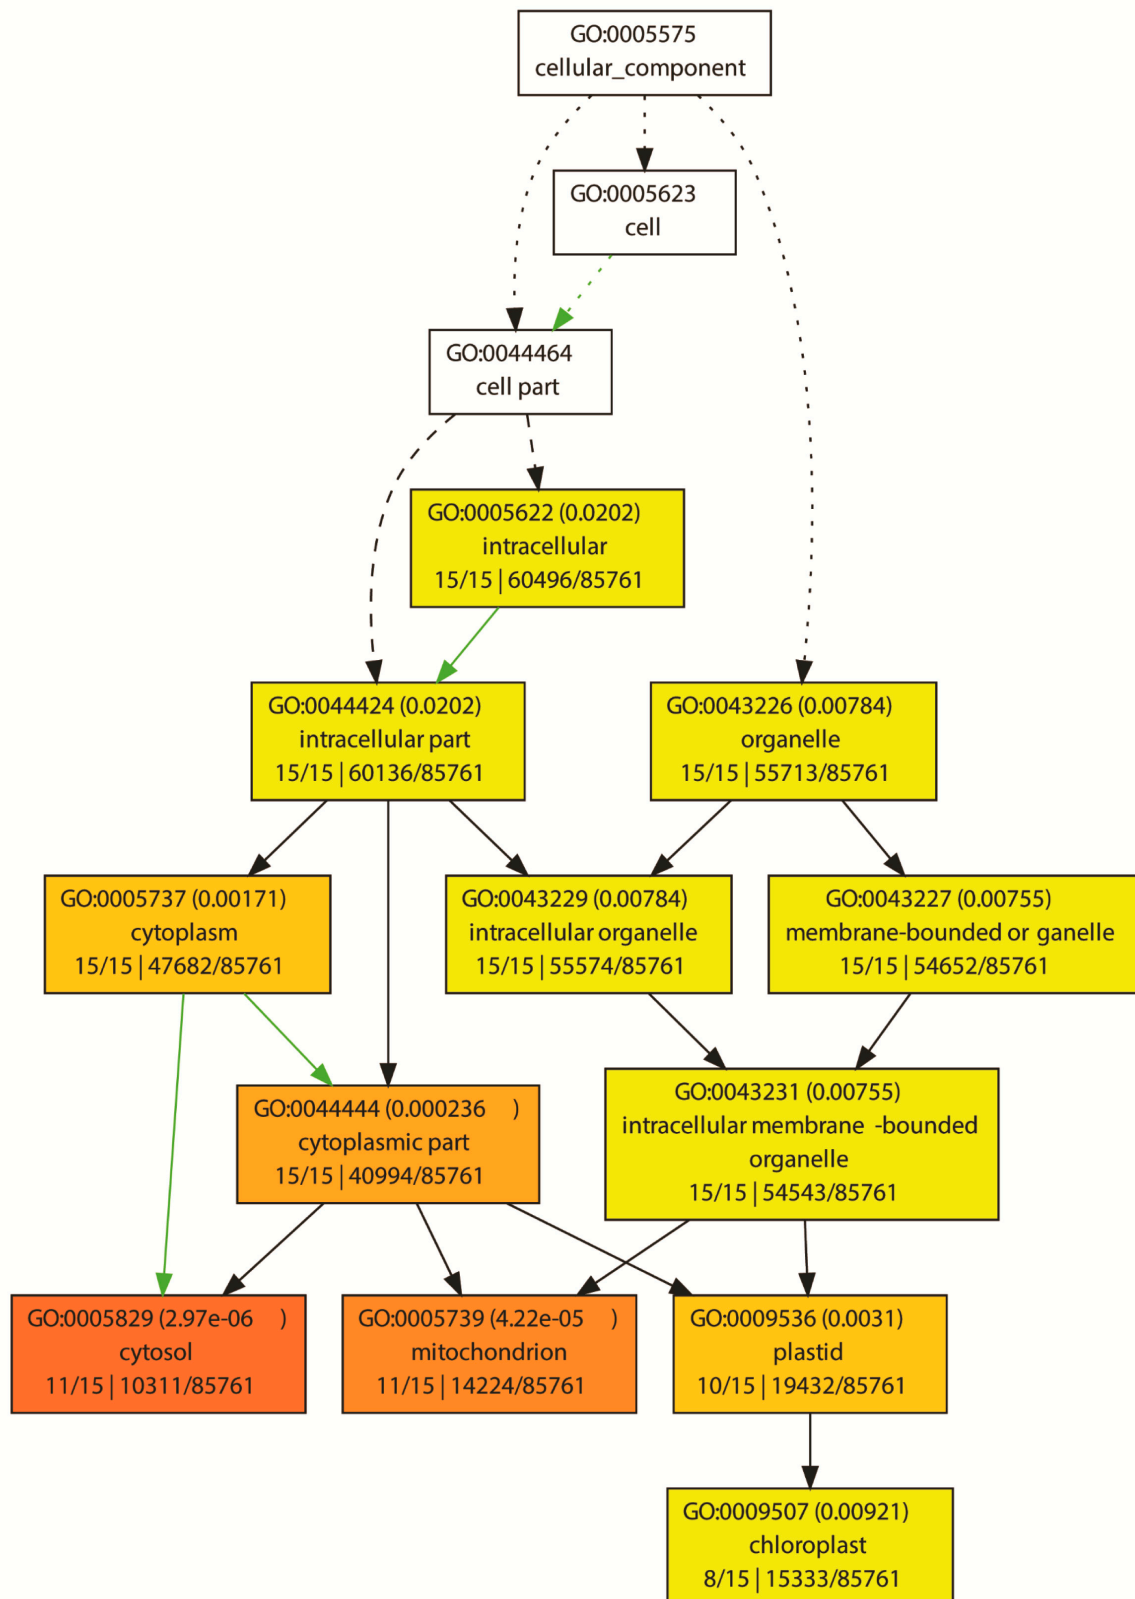

C

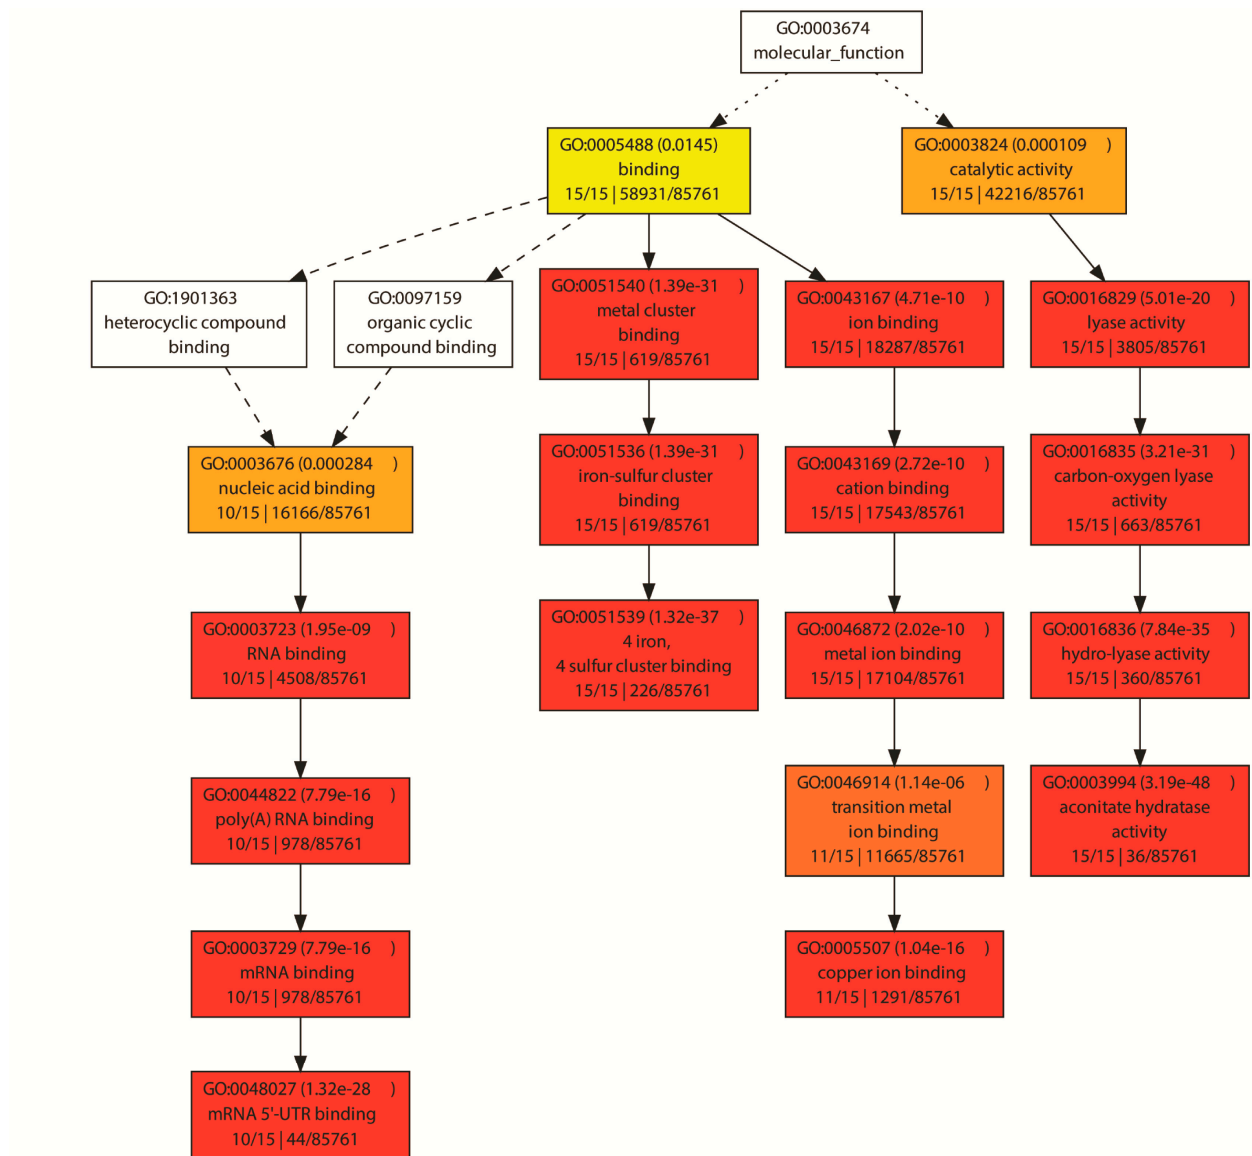

**Figure S9.** The predicted GO term of TaACO gene family using AgriGO **A.** Biological Process. **B.** Cellular component. **C.** Molecular function.

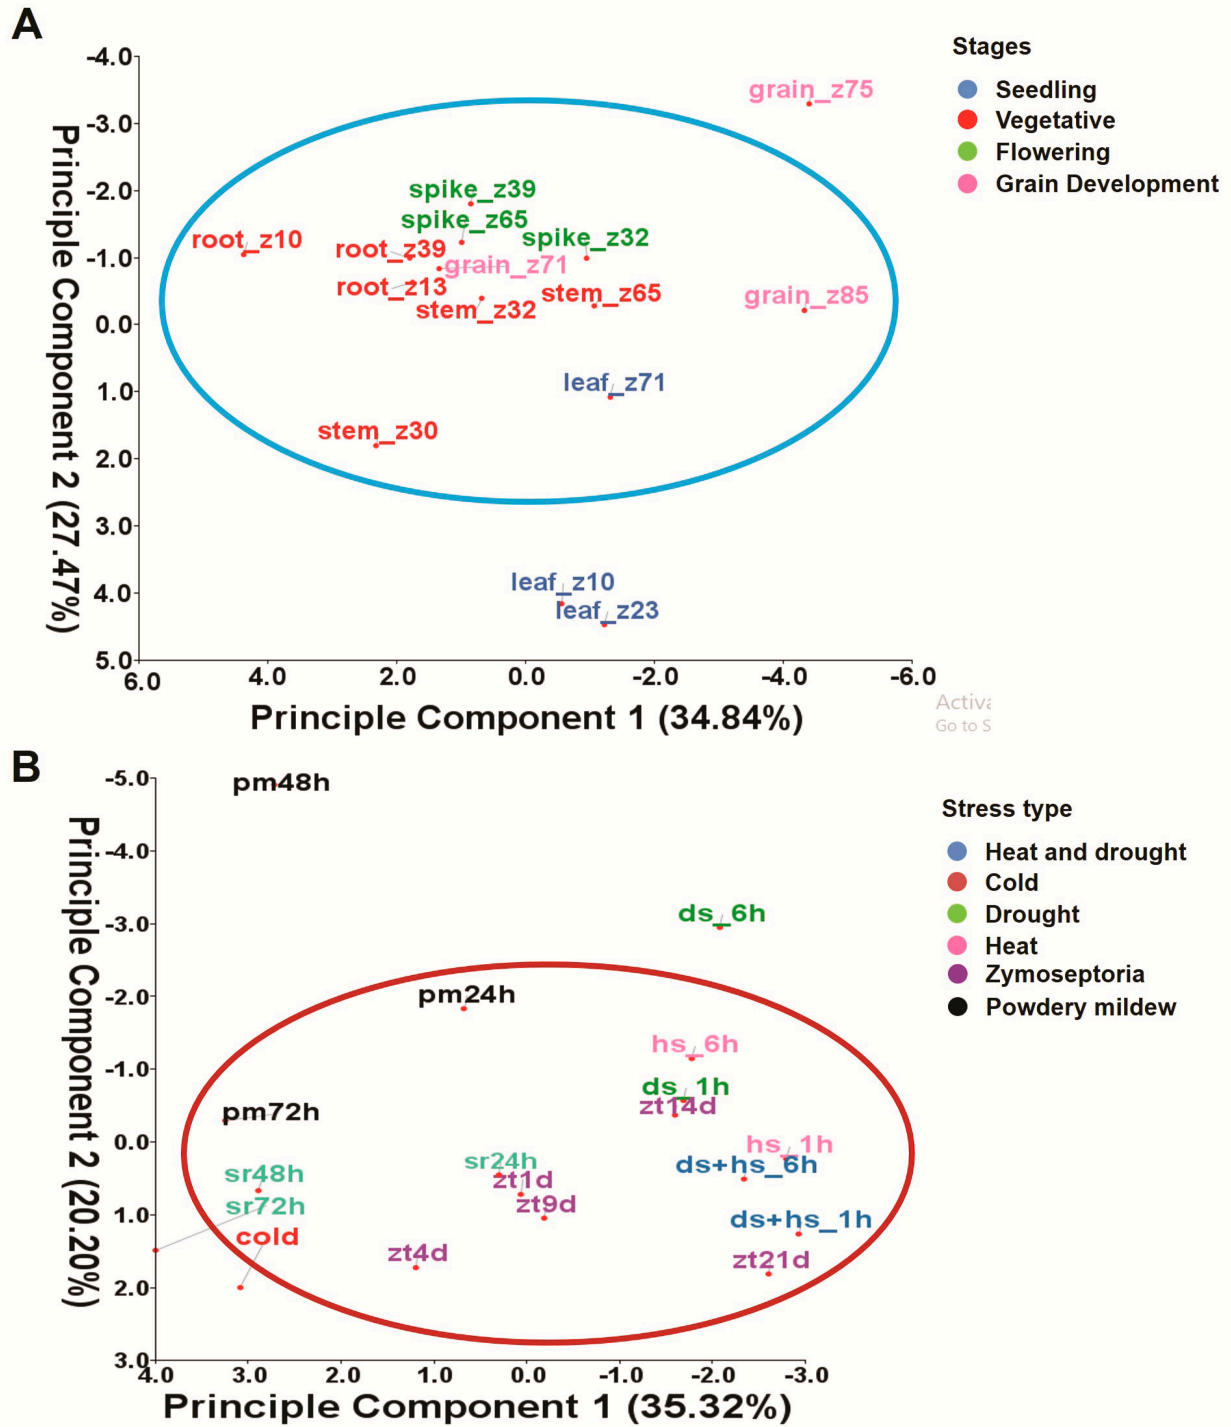

**Figure S10.** PCA plots displaying grouping of different (A) Different tissues and developmental stages (B) Diverse stress conditions based on the TaACO expression profiles. HS: Heat stress, DS: Drought stress, DS+HS: Combined drought and heat stress; PM: Powdery mildew; SR: Stripe rust, Zt: *Zymoseptoria tritici*, d: days and h: hour.

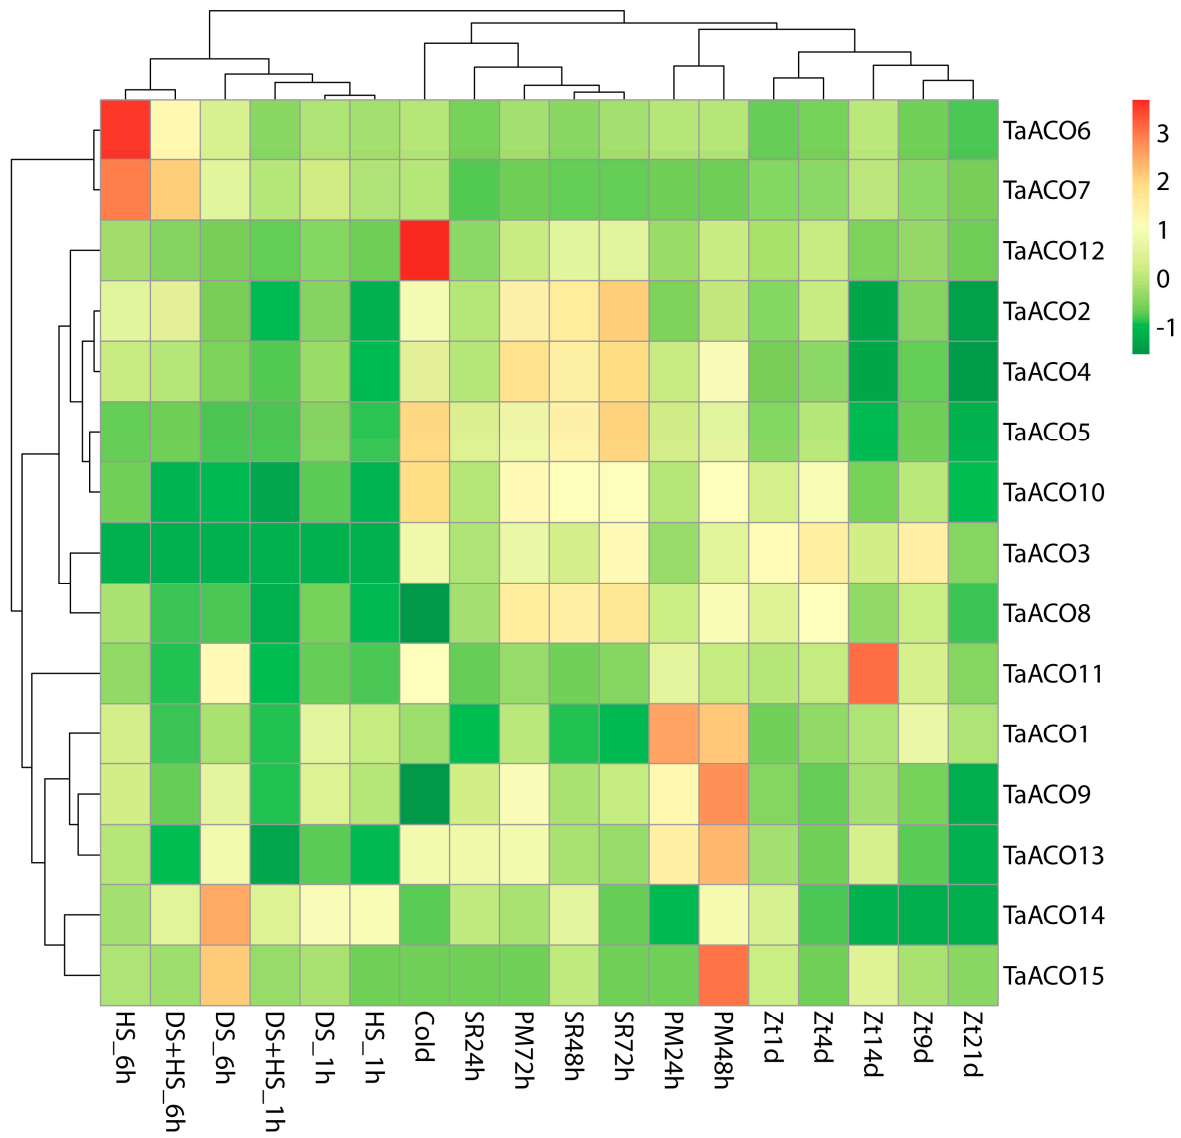

**Figure S11.** Heatmaps signifying the expression profile of *TaACO* genes in biotic and abiotic stress conditions. TPM values were directly used to produce the heatmaps. HS: Heat stress, DS: Drought stress, DS+HS: Combined drought and heat stress; PM: Powdery mildew; SR: Stripe rust, Zt: *Zymoseptoria tritici*, d: days and h: hour.
