# Supplementary material for: Genome-Wide Identification and Expression Profiling of Aconitase Gene Family Members Reveals Their Roles in Plant Development and Adaptation to Diverse Stress in Triticum aestivum L
Source: Plants (Basel). 2022 Dec 12;11(24):3475. doi: 10.3390/plants11243475 (PMC9782157; doi:10.3390/plants11243475)
Supplement: Supplementary file 1 [file plants-11-03475-s001.zip › Table S1-S10.xlsx]

## Sheet: Table S1
Table S1. TaACO genomic, conserved domain sequence, protein and promoter sequence.
Gene ID	Gene Name	Genomic sequence
TraesCS2B02G181900	TaACO1	ATGAACTACTCATGCATCATCAGAGAGGCATCAATGAGGATGATAAACCCCTTCGTGATGGTGTCTAGATTGGATTTTTGGTTTCTGGAACTTGCGGCGACTGGAATTGTGTTTCGTTGACTCCCCTGGGGTTTTTGGATTTCTGGGGTATTTATAGAGCAAAGAGGCAGTGCGGGAGGCGGCGAGGTGGGCACTGCCGGCCCACTCACCCACCTCCCCTGCGAGCTCGACTGAGTAATTCCAGGCTCCCCTGCGACCTCAACATGCAAGCATGATTGGTTCCCCCGTTTCCCTGGTATTTTCCATTGAAAGTGCCGCAATTTAGAATTTGTTGTGTTTGTGTGTTTCAGAGTCGATTCGATTCGATCGACGATCTCAAAGTAGAATTAGACGTTCAGT…
TraesCS3A02G184000	TaACO2	GGGTTCTTCCATTAGTTTGCTTCGTTTTTAATCTTCCCTTATTTTCGTTTGCCGCGACGGCCGGCCGGACGGGGACGGCTTTGCTTGCCGCCGGCCGTGTGTTTGCTGGATGTTTGCTCCCTCCAACTTGCATTTCTCTACTGGCTACGGTGCTTGTACTGGCCCCACACACTTGCCTTCAATCACAGTAGATTATTCCCTCCAATAATTCCTCCTCCACTGATTGGCCATTACGACTCCAGTGCTCTGCCTGGTGCTTTTTCTCGGGCAAATCCCCCATGGCGTCCACGGCTGGACTCCAAACTTCCCACGGCCACTGGTTCAACACCACCCTCACATCCTCCCAATCCCACCTTGGCTTCCGCTCCTCCTTCCCGCGTCCTCCAGCTGGGGATTTTT…
TraesCS3B02G213800	TaACO3	ATGGTTTTACCAGGTGTGGTTGGATTCAAGCTCACCGGAAAGTTACAGGATGGTGTCACTACTACAGACCTTGCCCTTACTTTGACCCAGATGCTAAGGAAGCATGGTGTTGTTGGCAAATTTATTGAATTCCACGGTAGGGGTTCGTGCTAAATAGCGACAGATAACATGTTCGTATATATTGGTCATATTTAATTAGTGTTTTCTCCTTTTTCTATTACATTCAGGTGAGGGTGTGGGCAGCATCCCTTTGCCTGCTAGAGCCACAATCGCAAACATGACTCCAGAATATGGCGCTACCATGGGATTTTTCCCTGTAGATCAAGTGGGATTAGATTACCTCAGACTAATAGGGCGAAGTGATGAAACAGTATGTTTAACTATCTACTACTCTTAGTC…
TraesCS3B02G213900	TaACO4	GTGGCCATGCACCATTTTCATTAAACTATTGCTAGTACAAAGCTAGTCCCATCGGCAGATCCTTCTCCCTCCAGCTCCGTTCTGCTTCCGCCGATCTCCACCTTATGCTCCTTGCCCGCACCGCGGCCAGGCGCCTCACGCTCACGCGGCCGTGCGGGTGGTCATCGGCGGGTCTCGTCTCGCGGACAGGCGCCGGAACGACGGTTGGTGCGCCGCCGTGCCGGCCGTCCATCGAGCGATTTTTCCTGCGCAAGATGGCCGATGCAGGTGCGTTAGCGTGTGTTTTCTCTCTCCCCCCCTCTCTCCGTGTGTGTGTGTTCGTATGAGTTTGTGCAATCGACTTCAACTCGGCCGGCAGTATAAGAAGATAACCCAAGTGGCCCAAGAAGACCCATCCCC…
TraesCS3D02G188200	TaACO5	GTGGCCATGCACCATTTTCATAAAACTATTGCTAGTACAAACCTAGTCCCATCGGCAGATCCTTCTCCCTCCAGCTCCGTTCTGCTTCCGCCGATCTCCACCTTATGCTCCTTGCCCGCACCGCGGCCAGGCGCCTCACGCTCACGCGGCCGTGCGGGTGGTCATCGGCGGGTCTCGTCTCCCGGACAGGCGCCGGAACGACGGTTGGTGCGCCGCCGTGCCGGCCGTCCATCGAGCGATTTTTCCTGCGCAAGATGGCCGACGCAGGTGCGTGCGCGTGTGGTTTCTCTCTATCTCCGTGTGTGTATTCAACTAAACTATTCATATGAGTTTGAGAAATGGAGATGGAGATGGAGGATGTTTTGGTCGACTCGGTTAGCAGTATAGTACGTATAACCC…
TraesCS4B02G335100	TaACO6	ATGACAGTTTTATGCCTGTGTCTTTGTGCTCTTGCTTATATTGCTGCATGTATATTTTTTCAGGTACCTGTAGACCTTGTTGTGGATCATTCAGTACAAGTTGATGTGGCAAGATCGGAAAATGCTGTTCAGGCAAATATGGAGCTTGAGTTCAGCCGTAACAAGGAGCGGTTTGGATTCTTGAAATGGGGTTCCACTGCATTCAATAACATGCTTGTTGTTCCACCTGGATCTGGAATTGTTCACCAGGTATTTCAATAAAACAACTGTTTTGTTCTTAAATAATCATCTAAGTTACTTCTGTTAGTAAACACTAACAATTCTGTTTCTAGGTGAATCTTGAATATCTGGCCAGGGTTGTCTTCAACAATGGTGGGATACTTTACCCTGATAGTGTTG…
TraesCS5A02G505000	TaACO7	ATCCTCTTTCCCCCTCCCCCCCTTCCGATCCGCCATGCCTCCCCTCGCCAGCTCCCTCCTCCTCTCCCGCTCCGCCGCGGGGCCCGGCTCCGCGCGCGCCACCGCCGCCGCCGCGGCCGCGATCTCCAGGCCCGCCGCCGCGGAGCCCGCCCCCTGCCCCTCCGCGCCCGCCCCGTCCCCGCTCCACGCGGCCCGCGGCGGACAGGGCCCGCGCGGGGCCTTCGCGTCGGGCCTAGCGGGCCGCCTGTTCGGTGGCCGCCGCGCCGCCGCCCGCTCCTCGTCCTCCGCCGCCGCCGTCTTCGAGCGCCGATTCGCCTCCGCCGGTAAGGACCCCCCGCCACCTCGAAACGGATCGTCGCGTCGCGTCTCGGCGTCTCGCCCTCTCCTCTCGCTAACGGG…
TraesCS6A02G080600	TaACO8	GCCCACACGCCCGACTCGTGCTCGCCACGGCCGCACTACCCCCCAATCCCTCTATTGACCTCAAGGTGTTCGACCGCGCGCGCCGCCATGGCCTCCATCTCCGCCGCCGCCAAGGCCACCTCCGCCGCCTTCGCGCACAAGGTTCCCTTCCTCTCCCCTCCCCTCCCCTCGCCCCCCTCAAGCTTCTCACTCCGCTGACCCCTCCGTCCCCGTCCTCTCCCCTGCCGCAGAAGGAGCTCGCCGCGGCGGCGCCGCAGCAGCAGCGCTTGAGCGCGGGCGCCAGTAGCCGGCGCGCGCGGGCCGGGCGCGTCCGCGCGGTCGCGACGCCGACCCGCGCGCCGCGCTCCCCCGCGTCCACCGGCTCGGTGAAGAGCCCCATGACGACGACGGAGAAGATCC…
TraesCS6A02G400000	TaACO9	CAAACCCAACCGCGGTTAACCCCGAACCCGAGCCCCACCCGACCCAGGGTCAGGACGCCCCGCAGGCCGCAGCTCGCACCAACCCCACCCGCGCTCCCGGTGAATCGCACCGGCTCTCCCCGTATATGTATGAAGCTGCTGCCCCCTCCGCCCGCCGCCCCCTGCTGCTCCTCAGATCCCTCCTCCCACCACCGTCGTCTCCCTCCGCCGCCCCAGCTTCGCCGCGCCGCCTTCCCTCCAGCCGCCTCGCGGCCCTTCGCCGGACTGCTCCGCGCCGCCCGTGTGCGCTGCTCGTCGTCCACCTCGGGCAGGGGCAGGGGCAGCGTCGCGCGGTTCCAGCGCAGCAGCATGGCCGCCTCAGGTGCGTGCGTGCGTGCGTGCGTGCGTGCGTCCGGTGAT…
TraesCS6B02G108100	TaACO10	GCCCACACGCCCGACTCGTGCTCGCCACGGCCGCACTACCCCCCAATCCCCCTCTATTGACCTCAAGGTGTTCGACCGCGCGCGCCGCCATGGCCTCCATCTCCGCCGCCGCCAAGGCCACCTCCGCCGCCTTCGCGCACAAGGTTTCCTTCCTCTCCCCTCCCCTCCTTCCTCCTCTCCTCGCCCCCCTCCAGCTTCTCACCCAGCTGACCCCTCCGCCCCCTTGCTCTCCCCGCCGCAGAAGGAGCTCGCCGCGGCGGTGCCGCCGCAGCAGCTCGCGAGGAGCCGGCGCGCGCGGGCCGGGCGCGTTCGCGCGGTTGCGACGCCGACCCGCGCGCCGCGCTCCCCCGCGTCCACCGGCTCGGTGAAGAGCCCTATGACGACGACGGAGAAGATCCT…
TraesCS6B02G440200	TaACO11	GAGCCCCACCCGAGCAGCTCGCACCAACCCCGCCCGCCTCCCGGTGAATCGCACCGGCTCGGCTCTCCCCGTATATGTATGAAGCCGCTGCCTACTCCGCCCGCCTCCTCCTGCTGCTCCTCCCCAGATCCCTACTCCCACCACCGTCGACTCCCTCCGCCGCCCCAGCCTCGCCGCGCCGCCTTCCCCCCACCCGCCCCGCGCCCGTTCGCCGGACTTCTCCGCGCCGCCCGAGCGCGCTGCTCGCCGTCGCCGTCGGCCACCACCGGGCCTGCCGTCGAGCGGTCCCAGCGCAGCAGGATGGCCGCCTCAGGTGCGTGCGTGCGTGCGTGCGTGGTTCCGCGTTGCCAACCAGCCAGCCAGGGCGACCCGGAGCGGCTCGTGTTCGCGCCGCGCGCG…
TraesCS6D02G074300	TaACO12	GCCCACACGCCCGACTCGTGCTCGCCACGGCCGCACCACCCCCCAATCCCCTCTATTGACCTCAAGGTGTTCGACCGCGCGCGCCGCCATGGCCTCCATCTCCGCCGCCGCCAAGGCCACCTCCGCCGCCTTCGCGCACAAGGTTCCCTTCCTCTCCCCTCCCCTCCCCTCGCCCCCCTCTAGCTTCTCACTCCGCTGACCCCCTCGTCTCCTTCCTCTCCCCGCCGCAGAAGGAGCTCGCCGCGGCGGCGCCGCAGCAGCAGCGCTTGAGCGCGGGCGCCAGTAGCCGGCGCGCGCGGGCCGGGCGCGTCCGCGCGGTCGCGACGCCGACCCGCGCGCCGCGCTCCCCCGCGTCCACCGGCTCGGTGAAGAGCCCGATGACGACGACGGAGAAGATCC…
TraesCS6D02G384200	TaACO13	GCCCCACTGCCCAGGGTCACGACCCACCCCGCCCCGCAGCTCGCTCGCTCGCACCAACCCCACCCGCCTCCCGGTGAATCGCACCGGCCCTCCCCGTATATGTATGAAGCTGCTGCCTACTCCGCCCGCCTCCTCAGATCCCTACTCCCACCACCGTCTCCCTCCGCCGCCCCAGCTCCGCCGCGCCTCCTTCCCCCCAGCCGCCTCGCGCCCGTTCGCCGGACTGCTCCGCGCCGCCCGAGTGCGCTGCTCGTCGTCGTCCGCCGCGGGCAGGGGCAGGGGCAGCGTCGCGCCTGCCGTCGCGCGGTTCCAGCGCAGGATGGCCGTCTCAGGTGCGTGCGTGCGTCAACCACGGTGATCCGGAGCGGCTCGTGTTCGCGTCGCGCTCGCCGGTGCCGT…
TraesCS7A02G219100	TaACO14	CTTCCTTCCTGCCGCCGCTATCCGTCGTCGTCCAGGTGGGGAATGCCGCGGGGGGACACGAGGTGCGCCGCTCGCGTCCCTCCTCCTCGCCCCGCCACGACAGCGCCTCGACCTCGGCGCCTCCCCGTCCTCATCAACGCCACGCGCCAAATGCTATCCCCCCGCCGCCTGCCGCTTGTCGCATTGCTCCCCTCTTCGTCCGATCGGTCCGGTGGCCATGGGTACGATTTTCTGCTGCAACTTTTCGTTTTCTGTACTTTTACTTTGATCTTCGAGCGCATGTCGAGTCCTCGTTGCTCCTTGCTGCAAAGAATTTCGCCGTATTTTTGGGGTTAATTTAAGTGTATGTGCTTTTAGCCCTCCTTTTCGTTTCGTCGTTGTGGTTCGTAATTCGGCGAC…
TraesCS7D02G223000	TaACO15	ATGGGCTGGGAGAAAACCTCCCTGGAGCAAGTTGAAATACCATTCAAACCCTCACGTGTGATACTTCAGGTACGTCTGTACAAGGATCTAACATTAGTTGATTTCCCATATAAAACTCTTTGCATGCAGGATTTTCTAATGATACCTCGGCTTAGGATTTTACTGGTGTGCCTGTCCTTGTTGACCTTGCAAGCATGCGTGACGCAATGTCGGAATTAGGTGGCAATCCTGATAAGATTAACCCGATGGTATTAAATTATTTCCTATACTATATTTAGCCAGAGGGTATTTCCTTTCACATATTCTTTGTAGTTAATATACAGTTCCGTATTTCTGCTTTCAGGTTCCAGCAGATCTTGTAATTGATCACTCAGTAACTGCTAATGTGGTGAGGTCACA…
Gene ID	Gene Name	CDS sequence
TraesCS2B02G181900	TaACO1	ATGAACTACTCATGCATCATCAGAGAGGCATCAATGAGGATGATAAACCCCTTCGTGATGGTGTCTAGATTGGATTTTTGGAGCCGACGCACGCGGGCTGGGCGCGTCCACGCAGTTGCAACGTCCACCGGTCTGCCGCGTGCCCCTGCGTCCACCGGCTCGGTGAAGAGCCCCATGACGACAACGGAGAAGATCCTGGCGCGGAAGTCAGAGCGCGCGAGCCTCGAGCCTGGGGAGAACGTTTGGGTGGACGTCGACGTGCTGATGACGCATGATGTCTGTGGTCCGGGCACCATCGGGATCTTCAAGCAGGAGTTCGGGGAGGATGCCAAGGTGTGGGACCGCGAGAAGGTCGTCATCATCCCCGACCACTACATCTTTACAGGCGATGAGCGAGCA…
TraesCS3A02G184000	TaACO2	ATGGCGTCCACGGCTGGACTCCAAACTTCCCACGGCCACTGGTTCAACACCACCCTCACATCCTCCCAATCCCACCTTGGCTTCCGCTCCTCCTTCCCGCGTCCTCCAGCTGGGGATTTTTTGGAGCGTTCTCCTCCTCGTTGCCGCCGACGATGCTCGCATGCGGTGGCGGCGGCGATCGTGGTGGAGAAGCTGGGGCAGGGAAGGTCTGTTGGACCTTCTCTGCCGGTGCCTCGACGAAGCCGCGATGGCTTCTTGGCGCGGCGGGGGCGTCAGCAGCCTGCTGCCGCTCCCTGTGGCAGCGCCGTGGAGGGAGCGGGTGCGGCCGCCCCAGCAACCGATCGCTTCGCGAATACCTTGACCAGCCTCCCTAAGCCTGGTGGTGGAGAGTATGGCAAG…
TraesCS3B02G213800	TaACO3	ATGGTTTTACCAGGTGTGGTTGGATTCAAGCTCACCGGAAAGTTACAGGATGGTGTCACTACTACAGACCTTGCCCTTACTTTGACCCAGATGCTAAGGAAGCATGGTGTTGTTGGCAAATTTATTGAATTCCACGGTGAGGGTGTGGGCAGCATCCCTTTGCCTGCTAGAGCCACAATCGCAAACATGACTCCAGAATATGGCGCTACCATGGGATTTTTCCCTGTAGATCAAGTGGGATTAGATTACCTCAGACTAATAGGGCGAAGTGATGAAACAGTATCAATGATTGAAGCATATTTGCGAGCTAACAAGATGTTTGTGGACTGCAATGAGCCTCAAACGGGACCAGTTTACTCTTCAGATCTTGAGCTGGACCTTACTACGGTGGAGCCTTCT…
TraesCS3B02G213900	TaACO4	ATGCTCCTTGCCCGCACCGCGGCCAGGCGCCTCACGCTCACGCGGCCGTGCGGGTGGTCATCGGCGGGTCTCGTCTCGCGGACAGGCGCCGGAACGACGGTTGGTGCGCCGCCGTGCCGGCCGTCCATCGAGCGATTTTTCCTGCGCAAGATGGCCGATGCAGCAACCGATCGCTTCGCCAAGACCTTGACCAACCTCCCTAAGCCTGGTGGTGGAGAGTATGGCAAGTTCTACAGCATTCCTGCACTGAATGATCCAAAGATAGATAAGCTTCCCTACTGTATCCGTATTCTTCTAGAATCAGCTGTCCGCAACTACGATAACTTCCAAGTTACGGAGAGTGATATCCAGAATATCATCGACTGGGAGAAGACATCCCCAAAGCTTGCCGAGATACCA…
TraesCS3D02G188200	TaACO5	ATGGCGTCCACGGCTGGGCTCCAAACGTCCCACGGCCACTGGTTCAACACCACCCTCACATCCTCCCAATCCCACCTTTGCTTCCGCTACTCCTTCCCGCGTCCTCCAGCTGGGGATTTTCTGGAGTGCTCTCCCCCTCGTCGCTCCCGACGATGCTCGCATGCGGTGGCGGCGGCGATCGTGGTGGAGAAGCTGGGGCAGGGAAGGTCTCTTGGACCTTCTCTGCCAGTGTCTCGACGAAGCCGCGATGGCTTCTTGGCGCGGCGGGGGCGTCAGCAGCTTGCTGCCGCTCCCTGTGGCAGCGCCGTGGAGGGAGCGGGTGCGGCCCCAGCAACCGATCGCTTCGCGAAGACCTTGACCATCCTCCCTAAGCCTGGTGGTGGAGAGTATGGCAAGTTC…
TraesCS4B02G335100	TaACO6	ATGACAGTTTTATGCCTGTGTCTTTGTGCTCTTGCTTATATTGCTGCATGTATATTTTTTCAGGTACCTGTAGACCTTGTTGTGGATCATTCAGTACAAGTTGATGTGGCAAGATCGGAAAATGCTGTTCAGGCAAATATGGAGCTTGAGTTCAGCCGTAACAAGGAGCGGTTTGGATTCTTGAAATGGGGTTCCACTGCATTCAATAACATGCTTGTTGTTCCACCTGGATCTGGAATTGTTCACCAGGTGAATCTTGAATATCTGGCCAGGGTTGTCTTCAACAATGGTGGGATACTTTACCCTGATAGTGTTGTCGGCACAGATTCACACACAACTATGATAGATGGTCTTGGTGTTGCTGGATGGGGAGTTGGTGGTATAGAGGCAGAAGCTACA…
TraesCS5A02G505000	TaACO7	ATGATTGCTGCTGTCACCTGGATTTTTAAAGATAGAAATCATGCACCAGTAGGTGATAGGTTTCTGTATAAGATTAGCTGCACCGTCATCACATATTCTTCTTCCAGTGACAATTATAAAAGTCAACACTTCTATTTTAATCTGGATTTCACTGGTGTCCCAGCAGTTGTTGATCTTGCTTGCATGAGGGATGCTATGAGCAAACTTGGCAGTGACCCCAACAAAATTAATCCTCTGGTACCTGTAGACCTTGTTGTGGATCATTCAGTACAAGTTGATGTGGCAAGATCGGAGAATGCTGTTCAGGCAAATATGGAGCTTGAGTTCAGCCGTAACAAGGAGCGGTTTGGATTTTTGAAATGGGGTTCCACTGCATTCAATAACATGCTTGTTGTTCCA…
TraesCS6A02G080600	TaACO8	ATGGCCTCCATCTCCGCCGCCGCCAAGGCCACCTCCGCCGCCTTCGCGCACAAGAAGGAGCTCGCCGCGGCGGCGCCGCAGCAGCAGCGCTTGAGCGCGGGCGCCAGTAGCCGGCGCGCGCGGGCCGGGCGCGTCCGCGCGGTCGCGACGCCGACCCGCGCGCCGCGCTCCCCCGCGTCCACCGGCTCGGTGAAGAGCCCCATGACGACGACGGAGAAGATCCTGGCGCGGGCGTCGGAGCGCGCGAGCCTCGAGCCCGGGGAGAACGTGTGGGTGGACGTGGACGTGCTCATGACGCACGACGTCTGCGGGCCCGGCACCATCGGGATCTTCAAGCAGGAGTTCGGGGAGGACGCCAAGGTGTGGGACCGCGAGAAGGTCGTCATCATCCCCGACCAC…
TraesCS6A02G400000	TaACO9	ATGAAGCTGCTGCCCCCTCCGCCCGCCGCCCCCTGCTGCTCCTCAGATCCCTCCTCCCACCACCGTCGTCTCCCTCCGCCGCCCCAGCTTCGCCGCGCCGCCTTCCCTCCAGCCGCCTCGCGGCCCTTCGCCGGACTGCTCCGCGCCGCCCGTGTGCGCTGCTCGTCGTCCACCTCGGGCAGGGGCAGGGGCAGCGTCGCGCGGTTCCAGCGCAGCAGCATGGCCGCCTCAGGTACTGAGCATGCCTACAACAATATTTTGACCAGCCTCCCTAAGCCTGAGGGTGGTGAATACGGGAAATTTTACAGCCTTCCTGCACTAAATGACCCAAGGATTGATAAGCTGCCCTACTCTATCCGTATTCTTCTGGAGTCAGCTATCCGTAACTGTGATGGTTTC…
TraesCS6B02G108100	TaACO10	ATGGCCTCCATCTCCGCCGCCGCCAAGGCCACCTCCGCCGCCTTCGCGCACAAGAAGGAGCTCGCCGCGGCGGTGCCGCCGCAGCAGCTCGCGAGGAGCCGGCGCGCGCGGGCCGGGCGCGTTCGCGCGGTTGCGACGCCGACCCGCGCGCCGCGCTCCCCCGCGTCCACCGGCTCGGTGAAGAGCCCTATGACGACGACGGAGAAGATCCTGGCGCGGGCGTCGGAGCGCGCGAGCCTCGAGCCCGGGGAGAACGTGTGGGTGGACGTGGACGTGCTCATGACGCACGACGTCTGCGGGCCCGGCACCATCGGGATCTTCAAGCAGGAGTTCGGGGAGGACGCCAAGGTGTGGGACCGCGAGAAGGTCGTCATCATCCCCGACCACTACATCTTCACC…
TraesCS6B02G440200	TaACO11	ATGAAGCCGCTGCCTACTCCGCCCGCCTCCTCCTGCTGCTCCTCCCCAGATCCCTACTCCCACCACCGTCGACTCCCTCCGCCGCCCCAGCCTCGCCGCGCCGCCTTCCCCCCACCCGCCCCGCGCCCGTTCGCCGGACTTCTCCGCGCCGCCCGAGCGCGCTGCTCGCCGTCGCCGTCGGCCACCACCGGGCCTGCCGTCGAGCGGTCCCAGCGCAGCAGGATGGCCGCCTCAGGTACTGAGCATGCCTACAGCAATATTTTGACCAGCCTACCTAAGCCCGAGGGTGGTGAATACGGGAAATTCTACAGCCTTCCCGCACTAAATGACCCAAGGATCGATAAGCTGCCCTACTCTATCCGTATTCTTCTGGAGTCAGCTATCCGTAACTGTGATGGC…
TraesCS6D02G074300	TaACO12	ATGGCCTCCATCTCCGCCGCCGCCAAGGCCACCTCCGCCGCCTTCGCGCACAAGAAGGAGCTCGCCGCGGCGGCGCCGCAGCAGCAGCGCTTGAGCGCGGGCGCCAGTAGCCGGCGCGCGCGGGCCGGGCGCGTCCGCGCGGTCGCGACGCCGACCCGCGCGCCGCGCTCCCCCGCGTCCACCGGCTCGGTGAAGAGCCCGATGACGACGACGGAGAAGATCCTGGCGCGGGCGTCGGAGCGCGCCAGCCTCGAGCCCGGGGAGAACGTGTGGGTGGACGTGGACGTGCTCATGACGCACGACGTCTGCGGCCCCGGCACCATCGGGATCTTCAAGCAGGAGTTCGGGGAGGACGCCAAGGTGTGGGACCGCGAGAAGGTCGTCATCATCCCCGACCAC…
TraesCS6D02G384200	TaACO13	ATGAAGCTGCTGCCTACTCCGCCCGCCTCCTCAGATCCCTACTCCCACCACCGTCTCCCTCCGCCGCCCCAGCTCCGCCGCGCCTCCTTCCCCCCAGCCGCCTCGCGCCCGTTCGCCGGACTGCTCCGCGCCGCCCGAGTGCGCTGCTCGTCGTCGTCCGCCGCGGGCAGGGGCAGGGGCAGCGTCGCGCCTGCCGTCGCGCGGTTCCAGCGCAGGATGGCCGTCTCAGGTACTGAGCATGCCTACAGCAATATTTTGACCAGCCTCCCTAAGCCCGAGGGTGGTGAATACGGGAAATTCTACAGCCTTCCTGCACTAAATGATCCAAGGATCGATAAGCTGCCCTACTCTATCCGTATTCTTCTGGAGTCAGCTATCCGTAACTGCGATGGCTTCCAA…
TraesCS7A02G219100	TaACO14	ATGGCTACCAGCAGCAGCAACAGCAATCCATTCAGCTTCGCGTTGAGGGGGCTCCGAGACCGTGAGGGTGGCGATTGTGGCAGCTACTACAGCATCCCCGACCTAGGCGATCAGCGAATAGATAAACTGCCATACACCATTCGTGTTCTTCTTGAATCTGCGGTGCGTAATTGTGACGAGTTCCAAATAACCAAGGAGGATGTAGAGAAGATCATGGGCTGGGAGAAGACCTCCCTGGAGCAAGTTGAAATACCATTCAAACCCTCACGTGTGATACTTCAGGATTTTACCGGTGTGCCTGTCCTTGTTGACTTTGCAAGCATGCGCGACGCAATGTTGGAATTAGGTGGCAATCCTGATAAGATTAACCCGATGGTTCCAGCAGACCTTGTAATTGAT…
TraesCS7D02G223000	TaACO15	ATGGGCTGGGAGAAAACCTCCCTGGAGCAAGTTGAAATACCATTCAAACCCTCACGTGTGATACTTCAGGATTTTACTGGTGTGCCTGTCCTTGTTGACCTTGCAAGCATGCGTGACGCAATGTCGGAATTAGGTGGCAATCCTGATAAGATTAACCCGATGGTTCCAGCAGATCTTGTAATTGATCACTCAGTAACTGCTAATGTGGTGAGGTCACAAAATGCGATACAGGCCAATATGGAACTGGAATTCGAGAGAAACAAGGAACGGTTCGCCTTCCTTAAATGGGGGTCTTCTGCATTTCACAATATGCTTATCATACCTCCTGGTTCTGGTATTGTTCATCAGCCCATGAGCATGGTATTACCTGGTGTCGTTGGATTCAAGCTACATGGAACA…
Gene ID	Gene Name	Protein sequence
TraesCS2B02G181900	TaACO1	MNYSCIIREASMRMINPFVMVSRLDFWSRRTRAGRVHAVATSTGLPRAPASTGSVKSPMTTTEKILARKSERASLEPGENVWVDVDVLMTHDVCGPGTIGIFKQEFGEDAKVWDREKVVIIPDHYIFTGDERANRNVDILRDFCAEQKIKYFYDIKDLSDFRANPDYKGVCHIALAQEGHCRPGEVLLGTDSHTCNAGAFGQFATGIGNTDAGFVMGTGKALLKVPPTIRFVLDGEMPPYLLAKDLILQIIGEISVSGATYKSMEFAGSTIESLNMEERMTLCNMVIEAGGKNGVVPADETTFKYLEGKTSVEYEPVYSDAQARFYSDYRFDVSKLEPVVAKPHSPDNRALARECKDVKIDRVYIGSCTGGKTEDFIAAAKVFLASGKKVKVPTFLVPA…
TraesCS3A02G184000	TaACO2	MASTAGLQTSHGHWFNTTLTSSQSHLGFRSSFPRPPAGDFLERSPPRCRRRCSHAVAAAIVVEKLGQGRSVGPSLPVPRRSRDGFLARRGRQQPAAAPCGSAVEGAGAAAPATDRFANTLTSLPKPGGGEYGKFYSIPALNDPKIDKLPYCIRILLESAVRNYDNFQVTESDVQNIIDWEKTSPKLAEIPFKPARLVLMDNTGGPAVVDLAAIRDVIAELDSDPKKINPLVPVDLVIDHSVRVDVAKCADALKQNMDLEFSRNKERFSFFKWASSAFNNMLVLPPGSGILHQVNLEYLSRVVFKADGVLYPDSVVGTDSHTTMINSLGVAGWGVGGIEAMAAMLGQPMSMVLPGVVGFKLTGKLQDGVTTTDLALTLTQMLRKHGVVGKFIEFFYGEGV…
TraesCS3B02G213800	TaACO3	MVLPGVVGFKLTGKLQDGVTTTDLALTLTQMLRKHGVVGKFIEFHGEGVGSIPLPARATIANMTPEYGATMGFFPVDQVGLDYLRLIGRSDETVSMIEAYLRANKMFVDCNEPQTGPVYSSDLELDLTTVEPSVAGPKRPHDRVPLKEMKSDWHACLGNEVGFKGYAVPKEQHNKIVKFDYHGQPAEITHGSVVLAAVCSSTNSSNPSVMIGAGLVAKKACELGLEVKPWVKTSLAPGSLVVTKYLEHSGLQEYLNHQGFHLVGYGCTTCIGNSGDLDKSLSDAIVDNDVAVVAVLSGNRNYEGRVHPLTRANYLASPPFVVAYALAGTVDIDFENEPIGIGKDGKEVYFKDVWPTNEEIEQVIKSNVLPKMFVDTYGSITEGNDAWNNLVVPKETLYP…
TraesCS3B02G213900	TaACO4	MASTAGLQISHGHWFNTTLTSSQSHPCSRSSFPRPPAGDYLERSPPRCRRRCSHAVAAAIVVEKLGQRRSVGPSLPVPRRSRDGFLARRGRQQPAAAPCGSAVEGAGAAPATDRFAKTLTNLPKPGGGEYGKFYSIPALNDPKIDKLPYCIRILLESAVRNYDNFQVTESDIQNIIDWEKTSPKLAEIPFKPARLVLMDNTGGPAVVDLAAIRDVIAELESDPKKINPLVPVDLVIDHSVRVDVAKCADALKQNMDLEFSRNKERFSFFKWASSAFNNMLVLPPGSGILHQVNLEYLSRVVFKADGVLYPDSVVGTDSHTTMINSLGVAGWGVGGIEAMAAMLGQPMSMVLPGVVGFKLTGKLQDGVTTTDLALTLTQMLRKHGVVGKFIEFHGEGVGS…
TraesCS3D02G188200	TaACO5	MASTAGLQTSHGHWFNTTLTSSQSHLCFRYSFPRPPAGDFLECSPPRRSRRCSHAVAAAIVVEKLGQGRSLGPSLPVSRRSRDGFLARRGRQQLAAAPCGSAVEGAGAAPATDRFAKTLTILPKPGGGEYGKFYSIPALNDPKIDKLPYCIRILLESAVRNYDNFQVTESDVQNIIDWEKTSPKLAEIPFKPARLVLMDNTGGPAVVDLAAIRDVIAELESDPKKINPLVPVDVVIDHSVRVDVAKCADALKQNMDLEFSRNKERFSFFKWASSAFNNMLVLPPGSGILHQVNLEYLSRVVFKADGVLYPDSVVGTDSHTTMINSLGVAGWGVGGIEAMAAMLGQPMSMVLPGVVGFKLTGKLQDGVTTTDLALTLTQMLRKHGVVGKFIEFHGEGVGS…
TraesCS4B02G335100	TaACO6	MTVLCLCLCALAYIAACIFFQVPVDLVVDHSVQVDVARSENAVQANMELEFSRNKERFGFLKWGSTAFNNMLVVPPGSGIVHQVNLEYLARVVFNNGGILYPDSVVGTDSHTTMIDGLGVAGWGVGGIEAEATMLGQPMSMVLPAVVGFKLSGKLRNGVTATDLVLTVTQMLRKHGVVGKFVEFYGGGMGELSLADRATIANMAPEYGATMGFFPVDAKTLDYLKLTGRSDETVAMIETYLRANNMFVDYKQVQAERVYSSYLELDLDEVEPCLSGPKRPHDRVTLKNMQSDWLSCLDNKVGFKGFAVPKESQGKVAEFSFRGTPAKIKHGDVVIAAITSCTNTSNPNVMLGAALVAKKACDLGLEVKPWIKTSLAPGSGVVKKYLDKSGLQKYLNQLG…
TraesCS5A02G505000	TaACO7	MPPLASSLLLSRSAAGPGSARATAAAAAAISRPAAAEPAPCPSAPAPSPLHAARGGQGPRGAFASGLAGRLFGGRRAAARSSSSAAAVFERRFASAATKNSYDEILTSLAKPGGGADFGKYYSLPALADPRIDRLPYSIRILLESAIRNCDEFQVTGKDVEKILDWENSATKQVEIPFKPARVLLQDFTGVPAVVDLACMRDAMSKLGSDPNKINPLVPVDLVVDHSVQVDVARSENAVQANMELEFSRNKERFGFLKWGSTAFNNMLVVPPGSGIVHQVNLEYLARVVFNNGGILYPDSVVGTDSHTTMIDGLGVAGWGVGGIEAEATMLGQPMSMVLPAVVGFKLSGKLRNGVTATDLVLTVTQMLRKHGVVGKFVEFYGGGMGELSLADRATIANM…
TraesCS6A02G080600	TaACO8	MASISAAAKATSAAFAHKKELAAAAPQQQRLSAGASSRRARAGRVRAVATPTRAPRSPASTGSVKSPMTTTEKILARASERASLEPGENVWVDVDVLMTHDVCGPGTIGIFKQEFGEDAKVWDREKVVIIPDHYIFTSDERANRNVDILRDFCEEQKIKYFYDIKDLSDFRANPDYKGVCHIALAQEGHCRPGEVLLGTDSHTCNAGAFGQFATGIGNTDAGFVMGTGKALLKVPPTIRFVLDGEMPPYLLAKDLILQIIGEISVSGATYRSMEFVGSTIESLTMEERMTLCNMVIEAGGKNGVVPADETTFKYLEGKTLVEYEPVYSDAQARFYSDYRFDVSKLEPVVAKPHSPDNRALARECKDVKIDRVYIGSCTGGKTEDFIAAAKVFLASGKKV…
TraesCS6A02G400000	TaACO9	MKLLPPPPAAPCCSSDPSSHHRRLPPPPQLRRAAFPPAASRPFAGLLRAARVRCSSSTSGRGRGSVARFQRSSMAASGTEHAYNNILTSLPKPEGGEYGKFYSLPALNDPRIDKLPYSIRILLESAIRNCDGFQVTKNDVEKIIDWENTSPKLAEIPFKPARVLLQDFTGVPAVVDLAAMRDALAKLGSDANKINPLVPVDLVIDHSVQVDVARSSNALQSNMELEFTRNRERFGFLKWGSTAFQNMLVVPPGSGIVHQVNLEYLGRVVFNTDGIMYPDSVVGTDSHTTMIDGLGVAGWGVGGIEAEATMLGQPMSMVLPGVVGFKLSGKLRNGVTATDLVLTVTQMLRKHGVVGKFVEFHGEGMGKLSLADRATIANMSPEYGATMGFFPVDHVTLDY…
TraesCS6B02G108100	TaACO10	MASISAAAKATSAAFAHKKELAAAVPPQQLARSRRARAGRVRAVATPTRAPRSPASTGSVKSPMTTTEKILARASERASLEPGENVWVDVDVLMTHDVCGPGTIGIFKQEFGEDAKVWDREKVVIIPDHYIFTSDERANRNVDILRDFCEEQKIKYFYDIKDLSDFRANPDYKGVCHIALAQEGHCRPGEVLLGTDSHTCNAGAFGQFATGIGNTDAGFVMGTGKALLKVPPTIRFILDGEMPPYLLAKDLILQIIGEISVSGATYRSMEFVGSTIESLTMEERMTLCNMVIEAGGKNGVVPADETTFKYLEGKTSVEYEPVYSDAQARFYSDYRFDVSKLEPVVAKPHSPDNRALARECKDVKIDRVYIGSCTGGKTEDFIAAAKVFLASGQKVKVPT…
TraesCS6B02G440200	TaACO11	MKPLPTPPASSCCSSPDPYSHHRRLPPPPQPRRAAFPPPAPRPFAGLLRAARARCSPSPSATTGPAVERSQRSRMAASGTEHAYSNILTSLPKPEGGEYGKFYSLPALNDPRIDKLPYSIRILLESAIRNCDGFQVTKNDVEKIIDWENTSPKLAEIPFKPARVLLQDFTGVPAVVDLAAMRDALAKLGSDANKINPLVPVDLVIDHSVQVDVARSTNALQSNMELEFTRNRERFGFLKWGSTAFHNMLVVPPGSGIVHQVNLEYLGRVVFNTDGIMYPDSVVGTDSHTTMIDGLGVAGWGVGGIEAEATMLGQPMSMVLPGVVGFKLTGKLRNGVTATDLVLTVTQMLRKHGVVGKFVEFHGEGMGKLSLADRATIANMSPEYGATMGFFPVDHVTLD…
TraesCS6D02G074300	TaACO12	MASISAAAKATSAAFAHKKELAAAAPQQQRLSAGASSRRARAGRVRAVATPTRAPRSPASTGSVKSPMTTTEKILARASERASLEPGENVWVDVDVLMTHDVCGPGTIGIFKQEFGEDAKVWDREKVVIIPDHYIFTSDERANRNVDILRDFCEEQKIKYFYDIKDLSDFRANPDYKGVCHIALAQEGHCRPGEVLLGTDSHTCNAGAFGQFATGIGNTDAGFVMGTGKALLKVPPTIRFVLDGEMPPYLLAKDLILQIIGEISVSGATYRSMEFVGSTIESLTMEERMTLCNMVIEAGGKNGVVPADETTFKYLEGKTSVEYEPVYSDAQARFYSDYRFDVSKLEPVVAKPHSPDNRALARECKDVKIDRVYIGSCTGGKTEDFIAAAKVFLASGKKV…
TraesCS6D02G384200	TaACO13	MKLLPTPPASSDPYSHHRLPPPPQLRRASFPPAASRPFAGLLRAARVRCSSSSAAGRGRGSVAPAVARFQRRMAVSGTEHAYSNILTSLPKPEGGEYGKFYSLPALNDPRIDKLPYSIRILLESAIRNCDGFQVTKNDVEKIIDWENTSPKLAEIPFKPARVLLQDFTGVPAVVDLAAMRDALAKLGSDANKINPLVPVDLVIDHSVQVDVARSSNALQSNMELEFTRNRERFGFLKWGSTAFQNMLVVPPGSGIVHQVNLEYLGRVVFNTDGIMYPDSVVGTDSHTTMIDGLGVAGWGVGGIEAEATMLGQPMSMVLPGVVGFKLTGKLRNGVTATDLVLTVTQMLRKHGVVGKFVEFHGEGMGKLSLADRATIANMSPEYGATMGFFPVDHVTLDYL…
TraesCS7A02G219100	TaACO14	MSTSSSNSNPFSFALRGLRDREGGDCGSYYSIPDLGDQRIDKLPYTIRVLLESAVRNCDEFQITKEDVEKIMGWEKTSLEQVEIPFKPSRVILQDFTGVPVLVDFASMRDAMLELGGNPDKINPMVPADLVIDHSVTANVVRSQNAIQANMELEFERNKERFAFLKWGSSAFHNMLIIPPGSGIVHQVNLEYLARVVFNRDGLLYPDSVLGTDSHTTMINGLGVVGWGVGGIDAEAAMLGQPMSMVLPGVVGFKLHGTLRDGVTATDLVLTVTQMLRKHGVVGKFVEFYGRGMEELALADRTTIANMAPEYGATVGFFPVDHITLEYLKMTGREDETVSTIEAYLRANKMFVDYNEPKIEPTYSSYIELDLGDVEPCISGPKRPHDRVTLKDMKTDWHA…
TraesCS7D02G223000	TaACO15	MGWEKTSLEQVEIPFKPSRVILQDFTGVPVLVDLASMRDAMSELGGNPDKINPMVPADLVIDHSVTANVVRSQNAIQANMELEFERNKERFAFLKWGSSAFHNMLIIPPGSGIVHQPMSMVLPGVVGFKLHGTLRDGVTATDLVLTVTQMLRKHGVVGKFVEFYGRGMEELALADRATIANMAPEYGATVGFFPVDHITLEYLKMTGREDETVSTIEAYLRANKMFVDYNEPKIEPTYSSYIELDLGDVEPCISGPKRPHDRVTLKDMKADWHACLENKIGFKGYGIPKDLQNRVVKFDFHGQTAELKHGTVVIAAITSCTNTSNPTVMIASGLVAKKAYELGLEVKPWIKTSLAPGSGVVTKYLLRSGLLKYLSDLGFNLVGYGCTTCIGNSGDLDQI…
Gene ID	Gene Name	Promoter sequence
TraesCS2B02G181900	TaACO1	ATGCATGCTGGATAGCGGTCGATGAGTGGAGTAATAGTAGTAGATACAGAATCGTTTCCATCTACTTGTCATGGACGTGATGCCTATATACATGATCATTGCCTAGATATACTCATAACTATGCTCAATTCTGTCAATTGCTCAACAGTAATTTGTTCACCCACCGTAGAATACTTATGCTCTTGAGAGAAGCCACTAATGAAACCTATGGCCCCCGGGTCTATTCTCATCATATCAATCTATATCACTTTATTTACTTGCTTTGTTTTTACTTTGCCTTTACTTTTTACTTTGCATCTATCTATCAAAAATACCAAAAATATTATCTCTATCAGATCTCACTCTCGTAAGTAACCGTGAAGGAATTGACAACCCCTAAGCGTTGGTTGCGAGTTGCTA…
TraesCS3A02G184000	TaACO2	AGTTGTAATATAAATTGTATTGGAGTTCAGGATTATAAAGGCGTGATTTCAGGACAGGAGCATTTGCTTCTTGGGTGTATATACACTCTATGGAAATATTAGTAATTACTAAAAAGTCAAAAAAATCTGAAAATATTTTTGAAACTAACTTGGCCTTCCATTGTACTCGTAAAAGAAATTGCACGAAAGATAAAACCCTATTGACTTCAGGGGAAAATAAAAATGGAAGTTTAGACAAAAAAGTGTGAATAGTGACTTGTATATAACAATACTTTTTGCCCTAAAGTCAACGATGGGCTTTCGCGAAAACGATATATAGTAGTGCCAAAAAGACAATTTTATTCAAAGAAACTTTTGACTTTTTTTAATTTTTAATTAATTACTTTTCCAATATCAGGT…
TraesCS3B02G213800	TaACO3	AGCACAGTCATTGTAGTCGAGCGCAAGGAGGAAGGCAAGGCGCTACCTGTCCAGAGACCAGTATATTACTTGAGCGAGGTACTGTCGACCCCCAAGCAGAACTACCCCCACTACCAGAAGATGTGCTACGGTGTGCACTTCGCCGCCAAGAAGCTGAAGCCTTACTTTCAAGAGCATCCGATCACCGTGGTTTGCACGGCTCCACTGGCCGAGATCATTGGAAGCCGAGACGCCTCCGGCCGAGTAGCCAAATGGGCCATAGATCTGGCCCCTTACACCATCTACTACCAGCCCCGCACCGCCATCAAGTCACAAGCCCTGGCCGACTTCCTCGTCGACTGGGCCGAGACCCAGTACCTGCCGCCAGCGCCCGACTCCACCCATTGGCGGATGCATTTC…
TraesCS3B02G213900	TaACO4	GAGGAAGGCTAAACACAAGGGATCCCACCAGCGCTAGCCGATGGCGGCATCTTAGCGCGGAGGGGAGTGCGCGGTTGCGTATCCAGTTTTTTCGGATTGAGTTGACTGCCTCATTGAGCTAGTGAATACTTAGATGGCATTTACGTGATTGAGTGGGAGCGAAAAAACATTGTTTTTCCTTTGAACACAAAGAAAAAATTTCTTGGATGATTAATGAATAGTTTTTAGCGCCATTATGTTTTAACATATAACGATAATACACAGTTTTTAATTCCTCTATAAGAAACTAATAAACATGTCTGTGCGTTGCAACAGGAAAAAAATCACACGCCCAGCATTACTCAAGACCCATGCAGGTCCACGTCCTCTATTTCAACATTGTGCCCCAACCATGTAATT…
TraesCS3D02G188200	TaACO5	TGGCAAGCGGTGCCTTAGAGTTCCGACGTCAAACCATTCTCGCGCGCCGCACCATATCGCCGGTATCCATCAGCGCCGTCGGCCACGCGGTACCATGCCACCGGTACGGTACCCACCGCTCACTCACTGCGTTTCGGTTTATATGGTTCGATACAGTATTAATACTTTGATAAATACAATATGAAATTTAGATACAGTTCGATTTTGGTATATACTCCCTCCATCCGGAAATACTTGTCGGAGGAATGGATGTATCTAGACGTATTTTAGTTAGATACATCCATTTTTATGCATTTATCTGACAACTATTTCCGGACGGAGAGAGTACCAAATTATTTCGGTATGGCTTTGGTATATACCGTAAAAACCAAAGTTGACGCCAATTTAAAAATGACATAG…
TraesCS4B02G335100	TaACO6	AGGACCCCCCGCCACCTCGAAACGGATCGTCGCGTCGCGTCGCTCTATCCTCTCGCTAACAGGGCCTCCGCCTGGTTGTTCGTTCGTTTGTTTGTTTCGCAGCGACGAAGAACTCGTACGATGAAATCCTCACGAGCCTCGCCAAGCCGGGAGGCGGAGCCGACTTCGGCAAGTACTACAGCCTGCCCGCGCTCGCCGATCCGCGGATTGGTGAGTTGTTTCCCTGTTCCCCACCATTTTCGTCTGCTATTATGGCGTGGTATCCGTCTTATGCGGCCTGGTTCCTAGCCCGCGCCGTGTGTTGGGTGAATTGAGAATCTAATCAGGCTCTGCACGGCGTTTTGGTCCCTCTGTTACCGCTTGTTGTGAGTTGGGTGCATGAATTGTTCGCTTCTCCAA…
TraesCS5A02G505000	TaACO7	ATGATTGAATATTGCAATCAAGACAGTAGAAAGAGGGAAGATAGAAGGTGCCACGAAGCTTGCTACGTGGGACGACAAAGCAATTATTTGCCTGCACACGCCTTTCTATTGCACCAAGATAGATCAAACACATGGGATCTTTTTCTCTAATAAATTAATGTTTCCCCTTTGTCTTCCATTTACATATTCTGTGCTTCTTGTTTTTTTGCAGGGGCTGTGCTTCTTGTTATTACTTAGGGTAAATAAGAACATCTATTTCAGAAATTCGCTTTGGCACATGGGAGCGCGCGCTCTTGTCACCGAAAAAATTGCAAACAAAGATTTGGTGCATGCATATCGACATTACATGTGTGCATGTCAAGTTTCCGAAAAAAACCGGTATTTTTTGTGGCTTATGTA…
TraesCS6A02G080600	TaACO8	TCATTTGATAGTAGTTAGGATGAACTGTCATTTGTTTAAGTAAATGGCGCTACATGTTCAGATTCTGTGTGGTAAGCTCACCACTAGTTAGAAGTGATGACAACACCTTATGGGGGTTGCAACCAAACACCATGTCATATGTGCGCCTAATGCAATGCAGGCAACCAAACGCCGGGTCAAAAATGGTTGTTTCATGCAACTAAGAGCATGTAGGCAATCAAACTATGTGCATCTGAGTTTTTTTTGGCCCACATCCCCTCAAACCGACTCAATAGAGCCAGACTCGCCGGACCAGACTGGATCGGCAATGTAACCAAACACGCTCCAAATTCATCCCCAAACGAGCCTAAACATTGGCAATGTAACCAAACACACTGCAAATTCATCCCCAAACGAGCC…
TraesCS6A02G400000	TaACO9	CGGGCTCCTGGCTGGCTACACACGACCCAAGCAAGAGCCGGCTTGCGCTTGCACGTCTGGATCTCCTGCAACTGGAAGAACCAACCACGTAGGCACGTACAGTAGCTTTCCGTTTCCGGCTTCTCCTTCGGCAGTTCGGCCGGACGAGGCCGGCGGCGGCGGCGGCTTCGCCACGCACGCGCCAACGGTGCTACTACTACTTATCTTGTCTCGACGGAACGTGCTCGCCGTCGGGAGGCTTCCCCGGATTCCTCGTCACGCTTGACGGCGGCCGTTTGGTTACCCGTGAAATCATCGCCCTCCTGCACGCTAAGGGCATTTCATGTCATCTAACGTGACAGGTGACACCTTATCCATTCGCATACTCTGACTTCTCGCAAACTGAAGCCAAATATTAGA…
TraesCS6B02G108100	TaACO10	CCAGCCAGTGGCGCACTGACACGAATAAAACAGCAGTGTAGTTAAGGGTCAGACCTGCCTTGAGAAGGCGTAGGGGTCAAGTTAGCAAATCTGCCAACGTAGGGGCCAAGGAAGCCTATCTTCAAAAACTTCAATAAAAAAAGCTCCAAATGGAGCTTAGCTCACCACGTATGAATCTTTGGCTCTTTGCTACTGGCTTCTGTGTGTGGCGCTGGAAAATTCCAAAGCTGGAAAAAAACGCATTTCTTTCTCTTTTGTACTATGGGCGAAGAATAAAATACAACCCGTGCTTGGTATTAATTCGCATAATCTTGGTATTTTGTAAGATTTAATCTAAGCTAAAACAGGGAGATGCTACAAAATCAATCCTCATCCAAGTGAGTGTTTCACCTTCAACGC…
TraesCS6B02G440200	TaACO11	CAAGGAAATGAAGTATAGAAGTTGGAGTTGTGTTGACTTTAAAGAGCACTTGAAAATCACAGAGAGACAACCAACTCAATTAAAAAGCCAAATAATGCAAAAGTTTTTGTCAAACCACACTTTATCATGATTTATTAGCTTAAGTGTTGTGGCATGAAAATCAGGGTGTGACAATACCCCTTCCACGCGCCTGCCCATCTTGGACTATACCGTTGTCCACCCAGAAATCCCTCCACACCCCTGCAGATGTCGTCCCTGGCGGACACCATGCCCGACAGGTGTTCGGTCAAATGCCATTGAGCTTGGTTTTTTAACTTCTTGTTGTTTTTTAGAGAAGCATGATGGCGGGGCACTCGGTGATCAAGGATGGGTTTTTGTGCGGTGCATGGTTGATCGTTT…
TraesCS6D02G074300	TaACO12	TTGCCACATCACTCAATCAACATTTTTGGTCTTCGCCACGTCAGCCTGACAGGTGGGGCCAACTTGTCAGTTTCAGTGTTTTTGCACGTATCAGACAATCAGTGCTCTATGTTATAGATTAGGCGTGAAATTAATTTTTTTTACACTGGTTTAAATTTGATACTAAGTTTTAAACATGATGGTTTCAGATAAATAACTCTAATGCCGAGGAGCTCGTGGAGTAGCCTAGCCGCCCTCACCGCCATCTGAATCGTTGGACAAACTACGGCGGGATCCCCAGCCCCCCACTCCGGTGTGTGTGGATATGCACGTGGGCGTATGTGTGGCCACGGGCCAGCCAGTGACGCACTGACACGAGTGAGACGGCCATACAGACCCAGTGGAGGCCTTGAGAAGGCG…
TraesCS6D02G384200	TaACO13	TGCCAGTTGCCACGCACGCGCCAACGGTGCTACTACTTATCTTGTCTCGACGGGAGGTGCTCGCCGTCGGGAAGCTTCCCCGCATCCCTTGTCACGCTCGACGGCGCCCGTTTGTTACCCGTAAAATCATCGCCCTCCTGCACGCTAAGGGCATTTCATGTCATCTAACGCAATACCTCATCCATTTGCAGACTGGTCCGGACGTCTGATTTCTCGCAAACTTAAGCCAATCTCAGGAGGCTTTATGAGAGCCTGGACATTAGCCAAGTAGGACTCCGGCACCTCCGCCCACTAAAATTCCCCTCACGGTTTTTTTTTCTTCCACTCGTTCGTGCTCCCAAATTGCTTTTATCCGCACCCTCGTCGTCCGTCGCCACCGTCGATGTACCTCTCCGGCCG…
TraesCS7A02G219100	TaACO14	GTGGAACGCCACAAATGTGGCTGCTACCAAACGTTTCTTGCACCTGCCAAGCATTTGGAAGAGTGAAAAAAAAACATGACATAAGTTTTTAGGGTAGCGAGATCTTCTCAAACCTTCATTGCGGAAAGAATATGAGATGTCAATTGAGGAAGAAGGCAATTCAATCGGTATCTGAGCTAGTTGTGAGGTCATCCACAGCAGAGTCTTCATTACTGATTTGCTCAGAAATAGCCCCTTCACGCTTCTTAAATAAAGCAACATGCTTCTGGTAATCTTCAAGCTCCTGTTCCAGCTGCTCAATAAATTTACTGGTATGTTCAAGAGACTGTTCATACCTATATTTCTCCAAGGCCTGTGGACATGGGAGTATAGATACATGATGTCAAGTCAACTGAACAA…
TraesCS7D02G223000	TaACO15	CTCGACCTCGGCGCCTCCCCGTCCTCATCAACGCCACGCGCCAAATGCGAGCCCCCCGCCGCCTGCCGCTCGTCGCATTGCTCCCCCTCTTCGTCCGATCGGTCCGGTGGGCATGGGTACGATTTTCTGCTGCAACTTTTCGATTTCTGTACTTTTACTTTGATCTTCGAGCGCACGTCGAGTCCTCGTTGCTCCTTGCTGCACAAATTTTCGCCGTATTTTTTGGGTTAACTTAAGCGTATGTGCTTTTAGCCCTCCTTTTCGTTTCCGCCGACGGCTAATTTCGTCGTTGTGGTCCGTAATTCGGCGACTTAGGGGATCGGCTCTCAGGTTATTTTATAGGCAGTTCATGGAATCAGTTTAACTAAATGAAGCACTTTTGATGATTATGTGTGCAGC…

## Sheet: Table S2
Table S2. The number of ACO genes found in the other crop species.
Plant species	Genome size (approx.)	Coding genes	ACO genes
Arabidopsis thaliana	~135 Mb	27000	3
Oryza sativa	430 Mb	36000	3
Glycine max	1.15 Gb	55897	8
Triticum aestivum	17 Gb	107891	15
Brachypodium distachyon	355 Mb	34310	2
Sorghum bicolor	730 Mb	27540	4
Zea mays	2.4 Gb	39591	6
Physcomitrella patens	500 Mb	35000	4
Selaginella moellendorffii	100 Mb	33936	4

## Sheet: Table S3
Table S3. ACO proteins from Arabidopsis, rice, soybean, wheat, brachypodium, sorghum, selaginella and physcomitrella used to produce phylogenetic tree.
Species	Gene ID	Gene Name	Protein sequences
A.thaliana	At4g35830	AtACO1	MASENPFRSILKALEKPDGGEFGNYYSLPALNDPRIDKLPYSIRILLESAIRNCDEFQVKSKDVEKILDWENTSPKQVEIPFKPARVLLQDFTGVPAVVDLACMRDAMNNLGGDSNKINPLVPVDLVIDHSVQVDVARSENAVQANMELEFQRNKERFAFLKWGSNAFHNMLVVPPGSGIVHQVNLEYLARVVFNTNGLLYPDSVVGTDSHTTMIDGLGVAGWGVGGIEAEATMLGQPMSMVLPGVVGFKLTGKLRDGMTATDLVLTVTQMLRKHGVVGKFVEFHGEGMRELSLADRATIANMSPEYGATMGFFPVDHVTLQYLRLTGRSDDTVSMIEAYLRANKMFVDYSEPESKTVYSSCLELNLEDVEPCVSGPKRPHDRVPLKEMKADWHSCLDN…
A.thaliana	At4g26970	AtACO2	MYRRATSGVRSASARLSSSLSRIASSETASVSAPSASSLRNQTNRSKSFSSALRSFRVCSASTRWSHGGSWGSPASLRAQARNSTPVMEKFERKYATMASEHSYKDILTSLPKPGGGEYGKYYSLPALNDPRIDKLPFSVRILLESAIRNCDNYQVTKDDVEKILDWENTSTKQVEIAFKPARVILQDFTGVPVLVDLASMRDAVKNLGSDPSKINPLVPVDLVVDHSIQVDFARSEDAAQKNLELEFKRNKERFTFLKWGSTAFQNMLVVPPGSGIVHQVNLEYLGRVVFNSKGFLYPDSVVGTDSHTTMIDGLGVAGWGVGGIEAEAAMLGQPMSMVLPGVVGFKLDGKLKEGVTATDLVLTVTQILRKHGVVGKFVEFYGEGMSELSLADRATIAN…
A.thaliana	At2g05710	AtACO3	MYLTASSSASSSIIRAASSRSSSLFSFRSVLSPSVSSTSPSSLLARRSFGTISPAFRRWSHSFHSKPSPFRFTSQIRAVSPVLDRLQRTFSSMASEHPFKGIFTTLPKPGGGEFGKFYSLPALNDPRVDKLPYSIRILLESAIRNCDNFQVTKEDVEKIIDWEKTSPKQVEIPFKPARVLLQDFTGVPAVVDLACMRDAMNKLGSDSNKINPLVPVDLVIDHSVQVDVARSENAVQANMELEFQRNKERFAFLKWGSTAFQNMLVVPPGSGIVHQVNLEYLGRVVFNTKGLLYPDSVVGTDSHTTMIDGLGVAGWGVGGIEAEATMLGQPMSMVLPGVVGFKLAGKMRNGVTATDLVLTVTQMLRKHGVVGKFVEFYGNGMSGLSLADRATIANMSPEY…
O.sativa	LOC_Os03g04410	OsACO1	MPPLTSALLSRSSSTRIPAAAAAAAAISNPAGAAASSSSPSPPPPSSRPRPASPFASGLAGRIFGGRRAAARSSSSAAAVFERRFASAAAKNSYDEILTGLAKPGGGAEFGKYYSLPALSDPRIERLPYSIRILLESAIRNCDEFQVTGKDVEKILDWENSAPKQVEIPFKPARVLLQDFTGVPAVVDLACMRDAMSKLGSDPNKINPLVPVDLVIDHSVQVDVARSENAVQANMELEFHRNKERFGFLKWGSTAFRNMLVVPPGSGIVHQVNLEYLARVVFNNGGILYPDSVVGTDSHTTMIDGLGVAGWGVGGIEAEATMLGQPMSMVLPGVVGFKLTGKLRNGVTATDLVLTVTQMLRKHGVVGKFVEFYGGGMSELSLADRATIANMSPEYGATM…
O.sativa	LOC_Os06g19960	OsACO2	MELEFDRNKERFGFLKWASTAFHKMQVFPPGSGIVHQVNLEYLARVVFNADGIMYPDSVVGTDSHTTMINSLGVAGWGVGGIEAIVAMLGQPMDMVLPGVVGFKLSGMLRDGVTATDLVLTITQMLRKHGVVGKFVEFYGVGVGELSLPARATIANMSPEYGASMGFFPVDHYNYLRKISSFHTRLIKQHNLAITCTYDITRCMHNKKVSMIEAYLRANNMFVEHHEPHTERVYSSYLELNLIDVEPCISGPKRPHDRVPLKEMKSDWHACLDSRVGFKGFAVPRECQDKVVKFDFQGQPAEIKHGSVVLAAICSSTNTSNPSVIVGAGLVAKKACELGLEGLPFRFRSKNRSSPVYRKQVKPWVKTSFTHGSAVTREYLKHSHLQDYLNQQGFHLAAF…
O.sativa	LOC_Os08g09200	OsACO3	MYKAAYSSASARLSSSLLRFRSLPSPAPSSSLSRLLSLRARAFSRPSRGGWAAAGGWSGRASSSPVVGCGACRAQIGAVAPAVERVHRRMAATAAAEHPFKNILTTLPKPGGGEYGKFYSLPALNDPRIDKLPYSIRILLESAIRNCDNFQVNQNDVEKIIDWENTSPKLAEIPFKPARVLLQDFTGVPAVVDLAAMRDAMAKLGSDANKINPLVPVDLVIDHSVQVDVARSPNAVQSNMELEFKRNNERFGFLKWGSTAFHNMLVVPPGSGIVHQVNLEYLGRVVFNTDGIMYPDSVVGTDSHTTMIDGLGVAGWGVGGIEAEATMLGQPMSMVLPGVVGFKLTGKLQNGVTATDLVLTVTQMLRKHGVVGKFVEFYGEGMGKLSLADRATIANMSPE…
G.max	GLYMA_12G098900	GmACO1	MYITTASSSASSLLRATRPKLFFPSPSRNFASFTPCTSSFSATARSLLCSVPRWSHRLHSASPLTPRPRISAVAPLVERFHREIATMANENPFKGNLTSLPKPGGGEFGKFYSLPSLNDPRIDRLPYSIRILLESAIRNCDNFQVKKEDVEKILDWENNSTKQVEIPFKPARVLLQDFTGVPAVVDLACMRDAMNKLGSDSNKINPLVPVDLVIDHSVQVDVTRSDNAVQANMELEFQRNKERFAFLKWGSTAFRNMLVVPPGSGIVHQVNLEYLGRVVFNNEGLLYPDSVVGTDSHTTMIDGLGVAGWGVGGIEAEAAMLGQPLSMVLPGVVGFKLSGKLRNGVTATDLVLTVTQILRKHGVVGKFVEFYGDGMGELSLADRATIANMSPEYGATMGF…
G.max	GLYMA_13G308700	GmACO2	MASTVSSILRASRSKLSSSSSASLSRTLARSAPRRSPGSSSAATRSFGSAVPRWSHGVDWRSPLGLRPQIRAAAPLIERFHRRIATSATDNPFKGNLTSLPKPGGGEFGKFYSLPSLNDPRIDRLPYSIRILLESAIRNCDNFQVKKEDVEKIIDWENSSVKQVEIPFKPARVLLQDFTGVPAVVDLACMRDAMNKLGSDSNKINPLVPVDLVIDHSVQVDVARSENAVQANMELEFQRNKERFAFLKWGSNAFRNMLVVPPGSGIVHQVNLEYLGRVVFNTEGLLYPDSVVGTDSHTTMIDGLGVAGWGVGGIEAEAAMLGQPMSMVLPGVVGFKLSGKLRNGVTATDLVLTVTQILRKHGVVGKFVEFYGDGMGELSLADRATIANMSPEYGATMGF…
G.max	GLYMA_14G105300	GmACO3	MRVLSLTRFFSSPLDFTGIPAVVDLACVRDARNKLGSDSNKINPLVPVDLVINHSVQVDVARSENVRNNERFAFLKWGSNAFRNMLVVPPGSGIVHQVNLEYLGRIVFNTEGLLYPDSVVGTASHTTMIDRLGVAGWGFGGIEAEATVLGKPMSMVLCVVGFKLSGKLCNGVTTTDLVLTVTQILRKHGVVGKFVEFYGN
G.max	GLYMA_16G057900	GmACO4	MRIYDEFKEIVKIQKFRRLVSYSGFYCFATLISYFYVNNTTRAGFSRADQFYASYPAGTELLTDTTKLYKAALGNCFEAEEWGPFEFCVMAKHFERQGKSPYAYHAKMFRNTPKVWDCEKLMFIPDHYIFPNAEHAHYIVDISRKFCVEQDIKYFYAIQDCSNFRANPDCKGTGKVLLKVPPALRFVLEGEMPCYLLAKGLILHINGEISMSGASYKGMKFVGTTIENLSMEERMAVCNMVVEAVGKNSIVVTTYKYLGDMTLAPYEPVFSDENARFLVQYRFNASKMEPLVTKPHSSANLALLVAQLSKFLCFSFLLHKRVWMVIHLKTQLKGKFYTPRQGILHPRKHGISLSSPTCDHIFNQHSVEFAVGADNPESAICASLATGLLETRKSDQILE…
G.max	GLYMA_17G256100	GmACO5	MASSLLSPSFTSFPRIKKDVSLSAFTSQRCFKALPRRIIRCAVAAPQRQPSTTGSVRTAMTMTEKILARASEKVQLTPGDNVWVNVDILMTHDVCGPGSIGIFKREFGDDAKVWDREKLVIIPDHYIFTSDERANRNVDILRDFCHEQNIKYFYDIKDLSNFKVNPDYKGVCHVALAQEGHCRPGEVLLGTDSHTCTAGAFGQFATGIGNTDAGFVLGTGKLLLKVPPTLRFVMDGEMPDYLLSKDLILQIIGEITVAGATYKSMEFVGTTVESLTMEERMTLCNMVVEAGGKNGVVPADSTTFKYLEGKTSLPYEPVYSDDQARFLAEYRFDVSKLEPVVAKPHSPDNRALARECKDVKIDRVYIGSCTGGKTEDFMAAAKVFLASGKQVKVPTFLVP…
G.max	GLYMA_19G065100	GmACO6	MARTDSHTTMIDGLGVAGWGVGGIEAEAAMLGQNKRWRRTLGGMTLRILAVLMKIKQGSRVVVAQAKLICGSGLVLRNKRKT
G.max	GLYMA_20G036700	GmACO7	MAGTDSHITMIDGLGVAGWGVGGIEAQAAMLGQNRRRRRTLGGMTLRILAVLMKIKQGSRVVVAQAKLICGSGLALQNKGKT
G.max	GLYMA_20G199600	GmACO8	MAFNSSPFITCKKDLGFFAFPSPSSIIGKRQKCKKTSSNKIVSVVSSPKNKRSPSATGSTKIPMTATEKILARAAEKCEVRPGENAWANVDVLMINDITCPGISGIFKKEFGNTAKVWDREKIVVIPDHYIFTNDERAHRNVDIARDFCVEQDIKYFYDIQDRSNFRANPDYKGVCHVALAQEGHCRPGEVLFGTDSHTTSAGAFGQFATGVGNTDAAFVLGTGKILLKVPPTLRFVLDGEKPSYLLAKDLILNIIGEISVSGATYKTMEFVGTTIESLSMEERMTLCNMVIEAGGKNGIVAADRTTYKYLEDKTSAPYEPVSSDENARFLAQYRFDVSNMEPLVAKPHSPDNRALARECNNVKIDRVYIGSCTGGKTEDFMAAAKVFLAGGKTVKVPT…
T. aestivum	TraesCS2B02G181900	TaACO1	MNYSCIIREASMRMINPFVMVSRLDFWSRRTRAGRVHAVATSTGLPRAPASTGSVKSPMTTTEKILARKSERASLEPGENVWVDVDVLMTHDVCGPGTIGIFKQEFGEDAKVWDREKVVIIPDHYIFTGDERANRNVDILRDFCAEQKIKYFYDIKDLSDFRANPDYKGVCHIALAQEGHCRPGEVLLGTDSHTCNAGAFGQFATGIGNTDAGFVMGTGKALLKVPPTIRFVLDGEMPPYLLAKDLILQIIGEISVSGATYKSMEFAGSTIESLNMEERMTLCNMVIEAGGKNGVVPADETTFKYLEGKTSVEYEPVYSDAQARFYSDYRFDVSKLEPVVAKPHSPDNRALARECKDVKIDRVYIGSCTGGKTEDFIAAAKVFLASGKKVKVPTFLVPA…
T. aestivum	TraesCS3A02G184000	TaACO2	MASTAGLQTSHGHWFNTTLTSSQSHLGFRSSFPRPPAGDFLERSPPRCRRRCSHAVAAAIVVEKLGQGRSVGPSLPVPRRSRDGFLARRGRQQPAAAPCGSAVEGAGAAAPATDRFANTLTSLPKPGGGEYGKFYSIPALNDPKIDKLPYCIRILLESAVRNYDNFQVTESDVQNIIDWEKTSPKLAEIPFKPARLVLMDNTGGPAVVDLAAIRDVIAELDSDPKKINPLVPVDLVIDHSVRVDVAKCADALKQNMDLEFSRNKERFSFFKWASSAFNNMLVLPPGSGILHQVNLEYLSRVVFKADGVLYPDSVVGTDSHTTMINSLGVAGWGVGGIEAMAAMLGQPMSMVLPGVVGFKLTGKLQDGVTTTDLALTLTQMLRKHGVVGKFIEFFYGEGV…
T. aestivum	TraesCS3B02G213800	TaACO3	MVLPGVVGFKLTGKLQDGVTTTDLALTLTQMLRKHGVVGKFIEFHGEGVGSIPLPARATIANMTPEYGATMGFFPVDQVGLDYLRLIGRSDETVSMIEAYLRANKMFVDCNEPQTGPVYSSDLELDLTTVEPSVAGPKRPHDRVPLKEMKSDWHACLGNEVGFKGYAVPKEQHNKIVKFDYHGQPAEITHGSVVLAAVCSSTNSSNPSVMIGAGLVAKKACELGLEVKPWVKTSLAPGSLVVTKYLEHSGLQEYLNHQGFHLVGYGCTTCIGNSGDLDKSLSDAIVDNDVAVVAVLSGNRNYEGRVHPLTRANYLASPPFVVAYALAGTVDIDFENEPIGIGKDGKEVYFKDVWPTNEEIEQVIKSNVLPKMFVDTYGSITEGNDAWNNLVVPKETLYP…
T. aestivum	TraesCS3B02G213900	TaACO4	MASTAGLQISHGHWFNTTLTSSQSHPCSRSSFPRPPAGDYLERSPPRCRRRCSHAVAAAIVVEKLGQRRSVGPSLPVPRRSRDGFLARRGRQQPAAAPCGSAVEGAGAAPATDRFAKTLTNLPKPGGGEYGKFYSIPALNDPKIDKLPYCIRILLESAVRNYDNFQVTESDIQNIIDWEKTSPKLAEIPFKPARLVLMDNTGGPAVVDLAAIRDVIAELESDPKKINPLVPVDLVIDHSVRVDVAKCADALKQNMDLEFSRNKERFSFFKWASSAFNNMLVLPPGSGILHQVNLEYLSRVVFKADGVLYPDSVVGTDSHTTMINSLGVAGWGVGGIEAMAAMLGQPMSMVLPGVVGFKLTGKLQDGVTTTDLALTLTQMLRKHGVVGKFIEFHGEGVGS…
T. aestivum	TraesCS3D02G188200	TaACO5	MASTAGLQTSHGHWFNTTLTSSQSHLCFRYSFPRPPAGDFLECSPPRRSRRCSHAVAAAIVVEKLGQGRSLGPSLPVSRRSRDGFLARRGRQQLAAAPCGSAVEGAGAAPATDRFAKTLTILPKPGGGEYGKFYSIPALNDPKIDKLPYCIRILLESAVRNYDNFQVTESDVQNIIDWEKTSPKLAEIPFKPARLVLMDNTGGPAVVDLAAIRDVIAELESDPKKINPLVPVDVVIDHSVRVDVAKCADALKQNMDLEFSRNKERFSFFKWASSAFNNMLVLPPGSGILHQVNLEYLSRVVFKADGVLYPDSVVGTDSHTTMINSLGVAGWGVGGIEAMAAMLGQPMSMVLPGVVGFKLTGKLQDGVTTTDLALTLTQMLRKHGVVGKFIEFHGEGVGS…
T. aestivum	TraesCS4B02G335100	TaACO6	MTVLCLCLCALAYIAACIFFQVPVDLVVDHSVQVDVARSENAVQANMELEFSRNKERFGFLKWGSTAFNNMLVVPPGSGIVHQVNLEYLARVVFNNGGILYPDSVVGTDSHTTMIDGLGVAGWGVGGIEAEATMLGQPMSMVLPAVVGFKLSGKLRNGVTATDLVLTVTQMLRKHGVVGKFVEFYGGGMGELSLADRATIANMAPEYGATMGFFPVDAKTLDYLKLTGRSDETVAMIETYLRANNMFVDYKQVQAERVYSSYLELDLDEVEPCLSGPKRPHDRVTLKNMQSDWLSCLDNKVGFKGFAVPKESQGKVAEFSFRGTPAKIKHGDVVIAAITSCTNTSNPNVMLGAALVAKKACDLGLEVKPWIKTSLAPGSGVVKKYLDKSGLQKYLNQLG…
T. aestivum	TraesCS5A02G505000	TaACO7	MPPLASSLLLSRSAAGPGSARATAAAAAAISRPAAAEPAPCPSAPAPSPLHAARGGQGPRGAFASGLAGRLFGGRRAAARSSSSAAAVFERRFASAATKNSYDEILTSLAKPGGGADFGKYYSLPALADPRIDRLPYSIRILLESAIRNCDEFQVTGKDVEKILDWENSATKQVEIPFKPARVLLQDFTGVPAVVDLACMRDAMSKLGSDPNKINPLVPVDLVVDHSVQVDVARSENAVQANMELEFSRNKERFGFLKWGSTAFNNMLVVPPGSGIVHQVNLEYLARVVFNNGGILYPDSVVGTDSHTTMIDGLGVAGWGVGGIEAEATMLGQPMSMVLPAVVGFKLSGKLRNGVTATDLVLTVTQMLRKHGVVGKFVEFYGGGMGELSLADRATIANM…
T. aestivum	TraesCS6A02G080600	TaACO8	MASISAAAKATSAAFAHKKELAAAAPQQQRLSAGASSRRARAGRVRAVATPTRAPRSPASTGSVKSPMTTTEKILARASERASLEPGENVWVDVDVLMTHDVCGPGTIGIFKQEFGEDAKVWDREKVVIIPDHYIFTSDERANRNVDILRDFCEEQKIKYFYDIKDLSDFRANPDYKGVCHIALAQEGHCRPGEVLLGTDSHTCNAGAFGQFATGIGNTDAGFVMGTGKALLKVPPTIRFVLDGEMPPYLLAKDLILQIIGEISVSGATYRSMEFVGSTIESLTMEERMTLCNMVIEAGGKNGVVPADETTFKYLEGKTLVEYEPVYSDAQARFYSDYRFDVSKLEPVVAKPHSPDNRALARECKDVKIDRVYIGSCTGGKTEDFIAAAKVFLASGKKV…
T. aestivum	TraesCS6A02G400000	TaACO9	MKLLPPPPAAPCCSSDPSSHHRRLPPPPQLRRAAFPPAASRPFAGLLRAARVRCSSSTSGRGRGSVARFQRSSMAASGTEHAYNNILTSLPKPEGGEYGKFYSLPALNDPRIDKLPYSIRILLESAIRNCDGFQVTKNDVEKIIDWENTSPKLAEIPFKPARVLLQDFTGVPAVVDLAAMRDALAKLGSDANKINPLVPVDLVIDHSVQVDVARSSNALQSNMELEFTRNRERFGFLKWGSTAFQNMLVVPPGSGIVHQVNLEYLGRVVFNTDGIMYPDSVVGTDSHTTMIDGLGVAGWGVGGIEAEATMLGQPMSMVLPGVVGFKLSGKLRNGVTATDLVLTVTQMLRKHGVVGKFVEFHGEGMGKLSLADRATIANMSPEYGATMGFFPVDHVTLDY…
T. aestivum	TraesCS6B02G108100	TaACO10	MASISAAAKATSAAFAHKKELAAAVPPQQLARSRRARAGRVRAVATPTRAPRSPASTGSVKSPMTTTEKILARASERASLEPGENVWVDVDVLMTHDVCGPGTIGIFKQEFGEDAKVWDREKVVIIPDHYIFTSDERANRNVDILRDFCEEQKIKYFYDIKDLSDFRANPDYKGVCHIALAQEGHCRPGEVLLGTDSHTCNAGAFGQFATGIGNTDAGFVMGTGKALLKVPPTIRFILDGEMPPYLLAKDLILQIIGEISVSGATYRSMEFVGSTIESLTMEERMTLCNMVIEAGGKNGVVPADETTFKYLEGKTSVEYEPVYSDAQARFYSDYRFDVSKLEPVVAKPHSPDNRALARECKDVKIDRVYIGSCTGGKTEDFIAAAKVFLASGQKVKVPT…
T. aestivum	TraesCS6B02G440200	TaACO11	MKPLPTPPASSCCSSPDPYSHHRRLPPPPQPRRAAFPPPAPRPFAGLLRAARARCSPSPSATTGPAVERSQRSRMAASGTEHAYSNILTSLPKPEGGEYGKFYSLPALNDPRIDKLPYSIRILLESAIRNCDGFQVTKNDVEKIIDWENTSPKLAEIPFKPARVLLQDFTGVPAVVDLAAMRDALAKLGSDANKINPLVPVDLVIDHSVQVDVARSTNALQSNMELEFTRNRERFGFLKWGSTAFHNMLVVPPGSGIVHQVNLEYLGRVVFNTDGIMYPDSVVGTDSHTTMIDGLGVAGWGVGGIEAEATMLGQPMSMVLPGVVGFKLTGKLRNGVTATDLVLTVTQMLRKHGVVGKFVEFHGEGMGKLSLADRATIANMSPEYGATMGFFPVDHVTLD…
T. aestivum	TraesCS6D02G074300	TaACO12	MASISAAAKATSAAFAHKKELAAAAPQQQRLSAGASSRRARAGRVRAVATPTRAPRSPASTGSVKSPMTTTEKILARASERASLEPGENVWVDVDVLMTHDVCGPGTIGIFKQEFGEDAKVWDREKVVIIPDHYIFTSDERANRNVDILRDFCEEQKIKYFYDIKDLSDFRANPDYKGVCHIALAQEGHCRPGEVLLGTDSHTCNAGAFGQFATGIGNTDAGFVMGTGKALLKVPPTIRFVLDGEMPPYLLAKDLILQIIGEISVSGATYRSMEFVGSTIESLTMEERMTLCNMVIEAGGKNGVVPADETTFKYLEGKTSVEYEPVYSDAQARFYSDYRFDVSKLEPVVAKPHSPDNRALARECKDVKIDRVYIGSCTGGKTEDFIAAAKVFLASGKKV…
T. aestivum	TraesCS6D02G384200	TaACO13	MKLLPTPPASSDPYSHHRLPPPPQLRRASFPPAASRPFAGLLRAARVRCSSSSAAGRGRGSVAPAVARFQRRMAVSGTEHAYSNILTSLPKPEGGEYGKFYSLPALNDPRIDKLPYSIRILLESAIRNCDGFQVTKNDVEKIIDWENTSPKLAEIPFKPARVLLQDFTGVPAVVDLAAMRDALAKLGSDANKINPLVPVDLVIDHSVQVDVARSSNALQSNMELEFTRNRERFGFLKWGSTAFQNMLVVPPGSGIVHQVNLEYLGRVVFNTDGIMYPDSVVGTDSHTTMIDGLGVAGWGVGGIEAEATMLGQPMSMVLPGVVGFKLTGKLRNGVTATDLVLTVTQMLRKHGVVGKFVEFHGEGMGKLSLADRATIANMSPEYGATMGFFPVDHVTLDYL…
T. aestivum	TraesCS7A02G219100	TaACO14	MSTSSSNSNPFSFALRGLRDREGGDCGSYYSIPDLGDQRIDKLPYTIRVLLESAVRNCDEFQITKEDVEKIMGWEKTSLEQVEIPFKPSRVILQDFTGVPVLVDFASMRDAMLELGGNPDKINPMVPADLVIDHSVTANVVRSQNAIQANMELEFERNKERFAFLKWGSSAFHNMLIIPPGSGIVHQVNLEYLARVVFNRDGLLYPDSVLGTDSHTTMINGLGVVGWGVGGIDAEAAMLGQPMSMVLPGVVGFKLHGTLRDGVTATDLVLTVTQMLRKHGVVGKFVEFYGRGMEELALADRTTIANMAPEYGATVGFFPVDHITLEYLKMTGREDETVSTIEAYLRANKMFVDYNEPKIEPTYSSYIELDLGDVEPCISGPKRPHDRVTLKDMKTDWHA…
T. aestivum	TraesCS7D02G223000	TaACO15	MGWEKTSLEQVEIPFKPSRVILQDFTGVPVLVDLASMRDAMSELGGNPDKINPMVPADLVIDHSVTANVVRSQNAIQANMELEFERNKERFAFLKWGSSAFHNMLIIPPGSGIVHQPMSMVLPGVVGFKLHGTLRDGVTATDLVLTVTQMLRKHGVVGKFVEFYGRGMEELALADRATIANMAPEYGATVGFFPVDHITLEYLKMTGREDETVSTIEAYLRANKMFVDYNEPKIEPTYSSYIELDLGDVEPCISGPKRPHDRVTLKDMKADWHACLENKIGFKGYGIPKDLQNRVVKFDFHGQTAELKHGTVVIAAITSCTNTSNPTVMIASGLVAKKAYELGLEVKPWIKTSLAPGSGVVTKYLLRSGLLKYLSDLGFNLVGYGCTTCIGNSGDLDQI…
B. distachyon	BRADI_3g15050v3	BdACO1	MYKAASSARLLLRSLSSSASSPSSSCSPASRLVASRCLALSRPCGAWPGRGRVLPASSSSFTGVRAQIGAVAAPAAGTSFHRRRMATSATEHAFKNILTSLPKPGGGEFGKFYSLPALNDPRIDKLPYSIRILLESAIRNCDDFQVTKNDVEKIIDWENTSPKLAEIPFKPARVLLQDFTGVPAVVDLAAMRDAMAKLGSDANKINPLVPVDLVIDHSVQVDVARSHNALQSNMELEFIRNKERFGFLKWGSTAFQNMLVVPPGSGIVHQVNLEYLGRVVFNTDGIMYPDSVVGTDSHTTMIDGLGVAGWGVGGIEAEATMLGQPMSMVLPGVVGFKLTGNLRSGVTATDLVLTVTQMLRKHGVVGKFVEFYGEGMGKLSLADRATIANMSPEYGATMG…
B. distachyon	BRADI_1g75960v3	BdACO2	MPPLASSLLSRSAAGPVSSARVTAAAAVAAVSKPVAASEPAASPPVTPTPTAGTSSSPRSPFASGLAGRLFGGRRAAARSSSSAAAVFERRFASAATKNSYDEILTSLAKPGGGADFGKYYSLPRLADPRIDRLPYSIRILLESAIRNCDEFQVTGKDVEKILDWENSATKQVEIPFKPARVLLQDFTGVPAVVDLACMRDAMSKLGSDPNKINPLVPVDLVIDHSVQVDVARSQNAVQANMELEFSRNKERFGFLKWGSTAFNNMLVVPPGSGIVHQVNLEYLARVVFNNGGILYPDSVVGTDSHTTMIDGLGVAGWGVGGIEAEATMLGQPMSMVLPGVVGFKLTGKLKNGVTATDLVLTVTQMLRKHGVVGKFVEFYGGGMSELSLADRATIANMS…
S. bicolor	SORBI_3007G068100	SbACO1	MYRAAASPLRHSLRRLSSSYSAATPLAGAARFLAPSSEGRLSALTSSRLLGSAPCRCCSGAGIAERPASAWRGLATMADGNSRFGHVLTSLPKPGGGEYGKYYSLPALNDPRIERLPYSIRYLLESAIRNCDGFQITEKDVENIIDWENTAPKLVEIPFKPARVLLQDFTGVPAIVDLASMRDAMAQLGDDPGKIDPMIPVDLVIDHSVQADVVKSENALQANMQREFDRNKERFAFLRWGSTAFNNMLIVPPGSGIVHQVNLEYLGRVVFNTDGILYLDSVLGTDSHTTMIDGMGVAGWGVGGIEAEATMLGQPMSMVLPSVVGFKLTGKLRDGVTATDLVLTVTHILRKHGVVGKFVEFYGEGMSELAVANRATIANMSPEYGATMGFFPVDHVTLG…
S. bicolor	SORBI_3001G512800	SbACO2	MPPLTSSLLSRSTTGGSSARGVAAAAAISRPAADAAPSSSSPPARSTPTPRPRPSTASPFASGLAGRLFGGHRAAARSASSATAVFERRFASAATRNTYDEILTGLKRPGAGDEFGKYYSLPALSDPRIDRLPYSIRILLESAIRNCDDFQVTGNDVEKILDWEKSAPKLVEIPFKPARVLLQDFTGVPAVVDLACMRDAMSKLGSDPNKINPLVPVDLVIDHSVQVDVARSANAAQANMELEFHRNKERFGFLKWGSSAFRNMLVVPPGSGIVHQVNLEYLARVVFNNGGILYPDSVVGTDSHTTMIDGLGVAGWGVGGIEAEAAMLGQPMSMVLPGVVGFKLSGKLKNGVTATDLVLTVTQMLRKHGVVGKFVEFYGQGMSELSLADRATIANMSPE…
S. bicolor	SORBI_3002G316900	SbACO3	MANSSATKHAFKSILASLPKPGGGEYGKFFSLPALNDPRIDRLPYSIRVLLESAIRHCDNFQVTESDVEKIIDWENTSPKLAEIPFKPARCILMDNTGVPAVVDLAAMRDMMPKLGCDPYKINPLIPVDAVIDHAVRVDFAGRHDALDRNEELEFQRNKERFAFLKWASNAFHNMQVFPPGSGTVHQVNIEYLARVVFNEDGILYFDSVVGTDSHTTMANSLGVAGWGVGGIEAVVAMLGQPMGMVLPGVVGFKLSGKLRDGVTTTDLVLTMTQMLRKHGAIGKFVEFYGVGVGELSLPARATIANMSPEYGATMGFFPVDQVALDYLKLTGRSDETVSMIEAYLRANKMFVEHHEPETERVYSSYLELDLSDVEPCVSGPKRPHDRVPLKEMKSDWHA…
S. bicolor	SORBI_3006G000100	SbACO4	MYKAANARLLLRSLSSNSAASASVPVNNPRLAAASSSSSAARLALSLPCGAWVGRSSGLVRAAGWSGTRPRFAGARAQIGAAAVPAVERFQRRMATQATEHAFKDILTSLPKPGGGEYGKFYSLPALNDPRIDKLPYSIRILLESAIRNCDNFQVTKNDVEKIIDWENTSPKLAEIPFKPARVLLQDFTGVPAVVDLAAMRDAMAKLGSDANKINPLVPVDLVIDHSVQVDVARSQNAVQANMELEFSRNKERFGFLKWGSSAFQNMLVVPPGSGIVHQVNLEYLGRVVFNTDGILYPDSVVGTDSHTTMIDGLGVAGWGVGGIEAEATMLGQPMSMVLPGVVGFKLTGKLRSGVTATDLVLTVTQMLRKHGVVGKFVEFYGEGMGKLSLADRATIANM…
S. moellendorffii	SELMODRAFT_132907	SmACO1	MHSQELKYFSLDSFFAANPYKNLVKPLEGHGKYYSLPALNDPRVDKLPYSIKILLESCIRNCDNFQVTKEDVEKIIDWENTAPQQVEIAFKPARVILQDFTGVPAVVDLAAMRDAMKRLGGDPNVINPMIPVDLVIDHSVQVDVARAANALEANMKHEFDRNKERFGFLKWGATAFKNMLVVPPGSGIVHQVNLEYLARVVFSNDGFLYPDSLVGTDSHTTMIDGLGVAGWGVGGIEAEAAMLGQPMSMVLPEVVGFKLSGKLRTGVTATDLVLTCTQMLRKHGVVGKFVEFYGKGMQELSLADRATIANMSPEYGATMGFFPVDHVSLQYLRMTGREEKKVEMIESYLRANKMFIDYNEPETEKVYSSYLELDLDSVQPCVSGPKRPHDRVNLKDMKE…
S. moellendorffii	SELMODRAFT_133937	SmACO2	MHSQELKYFSLDSFFAANPYKNLVKPLEGHGKYYSLPALNDPRVEKLPYSIKILLESCIRNCDNFQVTKEDVEKIIDWENTAPQQVEIAFKPARVILQDFTGVPAVVDLAAMRDAMKRLGGDPNVINPMIPVDLVIDHSVQVDVARAANALEANMKHEFDRNKERFGFLKWGATAFKNMLVVPPGSGIVHQVNLEYLARVVFSNDGFLYPDSLVGTDSHTTMIDGLGVAGWGVGGIEAEAAMLGQPMSMVLPEVVGFKLSGKLRTGVTATDLVLTCTQMLRKHGVVGKFVEFYGKGMQELSLADRATIANMSPEYGATMGFFPVDHVSLQYLRMTGRDEKKVEMIESYLRANKMFIDYDEPETEKVYSSYLELDLDSVQPCVSGPKRPHDRVNLKDMKE…
S. moellendorffii	SELMODRAFT_443331	SmACO3	MLAAAWNLCLAAPIVRKDSGLSPPRLSCFHRVRSVHFRASIALRQRQEIAMVSGHPFESILTSLSKDDGGEYGKYYSLPDLHDPRIEKLPYSIKILLESAIRNCDNFQVTKDDVEKIADWVNTAPKLVEIPFKPARVILQDFTGVPALVDLAAMRDAMKRLGGDPTKINPLIPVDLVIDHSVQVDVARSANAVASNMQFEFNRNKERFAFLKWGSVAFKNMLVVPPGSGIVHQVNLEYLARVVFNRDGFLYPDSLVGTDSHTTMIDGLGVAGWGVGGIEAEATMLGQPMSMVLPEVVGFKLVGKLQAGVTATDLVLTVTQMLRKHGVVGKFVEFYGEGVSCLSLADRATIANMSPEYGATMGFFPVDQMTLNYLSLTGRDAEKVKMVEAYLRANDMFVD…
S. moellendorffii	SELMODRAFT_444572	SmACO4	MLAAAWNLCLAAPIVRKDSGLSPPRLSCFHRVRSVHFRASIALRQRQEIAMVSGHPFESILTSLSKDDGGEYGKYYSLPDLHDPRIEKLPYSIKILLESAIRNCDNFQVTKDDVEKIADWVNTAPKLVEIPFKPARVILQDFTGVPALVDLAAMRDAMKRLGGDPTKINPLIPVDLVIDHSVQVDVARSANAVASNMQFEFNRNKERFAFLKWGSVAFKNMLVVPPGSGIVHQVNLEYLARVVFNRDGFLYPDSLVGTDSHTTMIDGLGVAGWGVGGIEAEATMLGQPMSMVLPEVVGFKLVGKLQAGVTATDLVLTVTQMLRKHGVVGKFVEFYGEGVSCLSLADRATIANMSPEYGATMGFFPVDQMTLNYLSLTGRDAEKVKMVEAYLRANDMFVD…
P. patens	Pp3c1_670	PpACO1	MKADVEKIIDWEKTSSKQVEIPFKPARVILQDFTGVPCVVDLAAMRDAIKRLGGDPSKINPLVPVDLVIDHSVQVDVARKANALQVNMKLEFQRNKERFAFLKWGSTAFKNMLVVPPGSGIVHQVNLEYLARVVFNSEGYLYPDSVVGTDSHTTMIDGLGVAGWGVGGIEAEAVMLGQPMSMVLPLVVGFKLSGKMKTGVTATDLVLTVTQMLRKHGVVGKFVEFYGKGMAELSLADRATIANMAPEYGATMGFFPVDKITLDYLTLTGREGKKVKEIEGYLRANNMFIDHSKPPKDNKYSSHLELDLNTVEPCISGPKRPHDRVNLREMKKDWKDCLNNKVGFKGFAIPKDKQSKVAKFSYEGKAAELRHGSVVIAAITSCTNTSNPSVMIGAGLVAK…
P. patens	Pp3c15_25170	PpACO2	MQILTYVCRSLQAQRFCPRLPHVHGLRASSTASPVGLTRFGNSSFLAPPSQPRLSSPVINSRLFRTLAAASYPDEHRPADFSVARSTKSTVGLRSTIPGARMASTQASENPFSSLITDLPKPDGGSYGKFYSLVKLNDPRVDSLPYSIRYLLEAAIRNCDNFQVTKEDVEKIVDWEKTAPKQVEIPFKPARVILQDFTGVPAVVDLAAMRDAITRLGGDPDRINPLVPVDLVIDHSVQVDVARSANALQANMELEFSRNKERFGFLKWGATAFKNMLVVPPGSGIVHQVNLEYLARVVFNSNGILYPDTLVGTDSHTTMIDGLGVAGWGVGGIEAEAAMLGQPMSMVLPGVVGFKLNGKLRTGVTATDLVLTVTQILRKFGVVGKFVEFYGKGMSELTL…
P. patens	Pp3c15_25560	PpACO3	MRLSRLPLPPRLPDRSFTMPLFMYVCRSLRQHGCSSKFPLSLGHRAASSAASAGSIRSGVPSFRSTPSQPRLSPDSAGSRLFRTIVSASYSADECRAAVASVGRSSPRALSPTMVPTTTTVPGSRMASTQASENPFSSLITDLPKPDGGSYGKFYSLVKLNDPRVDSLPYSIRYLLEAAIRNCDNFQVTKEDVEKIVDWEKTAPKQVEIPFKPARVILQDFTGVPAVVDLAAMRDAITRLGGDPDRINPLVPVDLVIDHSVQVDVARSANALQANMELEFSRNKERFGFLKWGATAFKNMLVVPPGSGIVHQVNLEYLARVVFNSNGILYPDTLVGTDSHTTMIDGLGVAGWGVGGIEAEAAMLGQPMSMVLPGVVGFKLNGKLRTGVTATDLVLTVTQ…
P. patens	Pp3c9_25990	PpACO4	MLPLLHSGSHPRRFAPPLSSHAPPRSLPHFLSSLKFLCPASFHSVTILILLLSPPPPSPLPFPSTMASSPASKNPFSNLVTDLPKASGGSYGQYYSLVKLNDPRVDELPYSIRYLLESAIRNCDNFQVLEADVEKILDWKVTAPKQVEIPFKPARVILQDFTGVPAVVDLAAMRDAIERLGGDPDKINPLVPVDLVIDHSVQVDVARSPNALQANMELEFSRNKERFGFLKWGATAFKNMLVVPPGSGIVHQVNLEYLARVVFNSNGILYPDTLVGTDSHTTMIDGLGVAGWGVGGIEAEAAMLGQPMSMVLPGVVGFKLNGKLRTGVTATDLVLTVTQMLRKFGVVGKFVEFYGKGMSELTLADRATIANMSPEYGATMGFFPVDRVTLDYLRMTGRD…

## Sheet: Table S4
Table S4. Estimated nonsynonymous substitutions (Ka) and synonymous substitutions Ks ratio of duplicate gene pairs in TaACO gene family.
Duplicated TaACO gene pairs	Identity (%)	Ka	Ks	Ka_Ks	Duplication time (Mya)	Duplication type	Types of selection
TaACO8/TaACO12	93	0.000870007	0.0878569	0.009903	6.75822	WGD or segmental	Purify selection
TaACO14/TaACO15	95	0.0131669	0.036698	0.358791	2.82292	WGD or segmental	Purify selection
TaACO6/TaACO7	100	0.0201008	0.0863999	0.233648	6.64615	WGD or segmental	Purify selection
TaACO11/TaACO13	50	0.011243	0.0733374	0.153306	5.64134	WGD or segmental	Purify selection

## Sheet: Table S5
Table S5. Orthologous relationships of TaACO genes with other ACO genes in B. distachyon, Ae. tauschii, T. dicoccoides, O. sativa and A. thaliana.
T. aestivum (AABBDD)		B. distachyon (BB)
Chromosome	Gene name	Chromosome	Gene ID
5A	TaACO7	1	BRADI_1g75960v3
6A	TaACO8	3	BRADI_3g02487v3
6A	TaACO9	3	BRADI_3g15050v3
2B	TaACO1	3	BRADI_3g02487v3
4B	TaACO6	1	BRADI_1g75960v3
6B	TaACO10	3	BRADI_3g02487v3
6B	TaACO11	3	BRADI_3g15050v3
6D	TaACO12	3	BRADI_3g02487v3
6D	TaACO13	3	BRADI_3g15050v3
7D	TaACO15	1	BRADI_1g75960v3
T. aestivum (AABBDD)		Ae. tauschii (DD)
Chromosome	Gene name	Chromosome	Gene ID
3A	TaACO2	3	AET3Gv20416800
5A	TaACO7	4	AET4Gv20784000
6A	TaACO8	6	AET6Gv20201500
6A	TaACO9	6	AET6Gv20969300
7A	TaACO14	7	AET7Gv20554500
3B	TaACO3	3	AET3Gv20416800
3B	TaACO3	3	AET3Gv20416800
3B	TaACO4	3	AET3Gv20416800
4B	TaACO6	4	AET4Gv20784000
6B	TaACO10	6	AET6Gv20201500
6B	TaACO11	6	AET6Gv20969300
3D	TaACO5	3	AET3Gv20416800
3D	TaACO5	3	AET3Gv20416800
6D	TaACO12	6	AET6Gv20201500
6D	TaACO13	6	AET6Gv20969300
6D	TaACO13	6	AET6Gv20969300
7D	TaACO15	7	AET7Gv20554500
T. aestivum (AABBDD)		T. dicoccoides (AABB)
Chromosome	Gene name	Chromosome	Gene ID
3A	TaACO2	3A	TRIDC3AG025580
3A	TaACO2	3B	TRIDC3BG029310
5A	TaACO7	5A	TRIDC5AG071920
5A	TaACO7	4B	TRIDC4BG056160
6A	TaACO8	6A	TRIDC6AG009820
6A	TaACO8	6B	TRIDC6BG014820
6A	TaACO9	6A	TRIDC6AG058810
6A	TaACO9	6B	TRIDC6BG069580
7A	TaACO14	7A	TRIDC7AG028230
7A	TaACO14	7B	TRIDC7BG019050
2B	TaACO1	2B	TRIDC2BG023590
3B	TaACO3	3B	TRIDC3BG029310
3B	TaACO3	3A	TRIDC3AG025580
3B	TaACO4	3B	TRIDC3BG029310
3B	TaACO4	3A	TRIDC3AG025580
4B	TaACO6	4B	TRIDC4BG056160
4B	TaACO6	5A	TRIDC5AG071920
6B	TaACO10	6B	TRIDC6BG014820
6B	TaACO10	6A	TRIDC6AG009820
6B	TaACO11	6B	TRIDC6BG069580
6B	TaACO11	6A	TRIDC6AG058810
3D	TaACO5	3A	TRIDC3AG025580
3D	TaACO5	3B	TRIDC3BG029310
6D	TaACO12	6A	TRIDC6AG009820
6D	TaACO12	6B	TRIDC6BG014820
6D	TaACO13	6A	TRIDC6AG058810
6D	TaACO13	6B	TRIDC6BG069580
7D	TaACO15	7B	TRIDC7BG019050
7D	TaACO15	7A	TRIDC7AG028230
T. aestivum (AABBDD)		O. sativa
Chromosome	Gene name	Chromosome	Gene ID
3A	TaACO2	6	Os06g0303400
3A	TaACO2	6	Os06g0303400
5A	TaACO7	3	Os03g0136900
6A	TaACO8	2	Os02g0125100
2B	TaACO1	2	Os02g0125100
3B	TaACO3	6	Os06g0303400
3B	TaACO4	6	Os06g0303400
3B	TaACO4	6	Os06g0303400
4B	TaACO6	3	Os03g0136900
6B	TaACO10	2	Os02g0125100
3D	TaACO5	6	Os06g0303400
6D	TaACO12	2	Os02g0125100
7D	TaACO15	2	Os03g0136900
T. aestivum (AABBDD)		A. thaliana
Chromosome	Gene name	Chromosome	Gene ID
3A	TaACO2	2	AT2G05710
6A	TaACO8	4	AT4G13430
6A	TaACO9	2	AT2G05710
7A	TaACO14	4	AT4G35830
2B	TaACO1	4	AT4G13430
3B	TaACO3	2	AT2G05710
3B	TaACO4	2	AT2G05710
3B	TaACO4	2	AT2G05710
4B	TaACO6	4	AT4G35830
6B	TaACO10	4	AT4G13430
6B	TaACO11	2	AT2G05710
3D	TaACO5	2	AT2G05710
6D	TaACO12	4	AT4G13430
6D	TaACO13	2	AT2G05710
7D	TaACO15	4	AT4G35830

## Sheet: Table S6
Table S6. Identified the aconitase domains in the TaACO proteins predicted using pfam with default parameters.
Protein name	aln start	aln-end	envelope start	envelope end	hmm-acc	hmm name	hmm start	hmm end	hmm length	bit score	Individual e-value	Conditional e-value	Database	Outcompeted	Clan
TaACO1	64	491	63	491	PF00330.22	Aconitase	2	461	461	261.27	2.0e	1e-81	1	0
TaACO2	179	679	172	679	PF00330.22	Aconitase	4	461	461	539.26	9.5e	9.9e-166	1	0
TaACO2	808	936	807	937	PF00694.21	Aconitase_C	2	130	131	134.26	3.4e	3.5e-43	1	0	CL0364
TaACO3	1	328	1	328	PF00330.22	Aconitase	161	461	461	354.57	1.0e	1e-109	1	0
TaACO3	457	584	456	586	PF00694.21	Aconitase_C	2	129	131	135.2	1.7e	1.8e-43	1	0	CL0364
TaACO4	178	676	170	676	PF00330.22	Aconitase	4	461	461	545.17	1.5e	1.6e-167	1	0
TaACO4	805	932	804	934	PF00694.21	Aconitase_C	2	129	131	134.52	2.8e	3e-43	1	0	CL0364
TaACO5	178	676	171	676	PF00330.22	Aconitase	4	461	461	544.59	2.3e	2.4e-167	1	0
TaACO5	805	933	804	934	PF00694.21	Aconitase_C	2	130	131	134.27	3.4e	3.5e-43	1	0	CL0364
TaACO6	16	468	9	468	PF00330.22	Aconitase	50	461	461	532	1.5e	1.6e-163	1	0
TaACO6	597	725	596	726	PF00694.21	Aconitase_C	2	130	131	145.81	9.1e	9.5e-47	1	0	CL0364
TaACO7	161	664	161	664	PF00330.22	Aconitase	1	461	461	587.6	2.1e	2.2e-180	1	0
TaACO7	793	921	792	922	PF00694.21	Aconitase_C	2	130	131	145.5	1.1e	1.2e-46	1	0	CL0364
TaACO8	73	500	72	500	PF00330.22	Aconitase	2	461	461	261.02	2.4e	1.2e-81	1	0
TaACO9	141	644	141	644	PF00330.22	Aconitase	1	461	461	587.76	1.8e	1.9e-180	1	0
TaACO9	773	901	772	902	PF00694.21	Aconitase_C	2	130	131	147.57	2.6e	2.7e-47	1	0	CL0364
TaACO10	69	450	68	463	PF00330.22	Aconitase	2	420	461	211.61	2.3e	1.2e-66	1	0
TaACO11	142	645	142	645	PF00330.22	Aconitase	1	461	461	590.6	2.5e	2.7e-181	1	0
TaACO11	774	902	773	903	PF00694.21	Aconitase_C	2	130	131	147.06	3.8e	3.9e-47	1	0	CL0364
TaACO12	73	500	72	500	PF00330.22	Aconitase	2	461	461	261.98	1.2e	6.4e-82	1	0
TaACO13	140	643	140	643	PF00330.22	Aconitase	1	461	461	589.31	6.3e	6.6e-181	1	0
TaACO13	772	900	771	901	PF00694.21	Aconitase_C	2	130	131	147.57	2.6e	2.7e-47	1	0	CL0364
TaACO14	69	572	67	572	PF00330.22	Aconitase	1	461	461	578.25	1.4e	1.5e-177	1	0
TaACO14	701	828	700	830	PF00694.21	Aconitase_C	2	129	131	137.14	4.4e	4.6e-44	1	0	CL0364
TaACO15	8	118	3	119	PF00330.22	Aconitase	9	113	461	96.85	1.5e	1.6e-31	1	0
TaACO15	116	447	116	447	PF00330.22	Aconitase	157	461	461	377.34	1.2e	1.3e-116	1	0
TaACO15	576	688	575	688	PF00694.21	Aconitase_C	2	114	131	108.54	3.0e	3.2e-35	1	0	CL0364

## Sheet: Table S7
Table S7. Identified the cis-regulatory elements in the TaACO promoter region.
Gene ID	Cis-element	Sequence	Position	Length	Function
TaACO1	CAT-box	GCCACT	192	6	Arabidopsis thaliana	cis-acting regulatory element related to meristem expression
TaACO1	CAT-box	GCCACT	1267	6	Arabidopsis thaliana	cis-acting regulatory element related to meristem expression
TaACO1	CAT-box	GCCACT	1352	6	Arabidopsis thaliana	cis-acting regulatory element related to meristem expression
TaACO1	GC-motif	CCCCCG	212	6	Zea mays	enhancer-like element involved in anoxic specific inducibility
TaACO1	Sp1	GGGCGG	559	6	Oryza sativa	light responsive element
TaACO1	O2-site	GTTGACGTGA	1175	9	Zea mays	cis-acting regulatory element involved in zein metabolism regulation
TaACO1	TCA-element	CCATCTTTTT	1620	9	Nicotiana tabacum	cis-acting element involved in salicylic acid responsiveness
TaACO1	ARE	AAACCA	519	6	Zea mays	cis-acting regulatory element essential for the anaerobic induction
TaACO1	ARE	AAACCA	1757	6	Zea mays	cis-acting regulatory element essential for the anaerobic induction
TaACO1	G-box	CACGTC	74	6	Zea mays	cis-acting regulatory element involved in light responsiveness
TaACO1	G-box	TACGTG	677	6	Arabidopsis thaliana	cis-acting regulatory element involved in light responsiveness
TaACO1	G-box	CACGTC	1457	6	Zea mays	cis-acting regulatory element involved in light responsiveness
TaACO1	G-box	TACGTG	1651	6	Arabidopsis thaliana	cis-acting regulatory element involved in light responsiveness
TaACO1	TGA-element	AACGAC	569	6	Brassica oleracea	auxin-responsive element
TaACO1	ACE	GACACGTATG	1649	10	Petroselinum crispum	cis-acting element involved in light responsiveness
TaACO1	LTR	CCGAAA	1873	6	Hordeum vulgare	cis-acting element involved in low-temperature responsiveness
TaACO1	TGACG-motif	TGACG	1177	5	Hordeum vulgare	cis-acting regulatory element involved in the MeJA-responsiveness
TaACO1	TGACG-motif	TGACG	1422	5	Hordeum vulgare	cis-acting regulatory element involved in the MeJA-responsiveness
TaACO1	ABRE	ACGTG	75	5	Arabidopsis thaliana	cis-acting element involved in the abscisic acid responsiveness
TaACO1	ABRE	CGTACGTGCA	408	9	Hordeum vulgare	cis-acting element involved in the abscisic acid responsiveness
TaACO1	ABRE	ACGTG	677	5	Arabidopsis thaliana	cis-acting element involved in the abscisic acid responsiveness
TaACO1	ABRE	ACGTG	1457	5	Arabidopsis thaliana	cis-acting element involved in the abscisic acid responsiveness
TaACO1	ABRE	GACACGTACGT	1648	10	Oryza sativa	cis-acting element involved in the abscisic acid responsiveness
TaACO1	ABRE	TACGTGTC	1651	8	Oryza sativa	cis-acting element involved in the abscisic acid responsiveness
TaACO1	ABRE	ACGTG	1652	5	Arabidopsis thaliana	cis-acting element involved in the abscisic acid responsiveness
TaACO1	GATA-motif	GATAGGA	1402	7	Arabidopsis thaliana	part of a light responsive element
TaACO1	CGTCA-motif	CGTCA	1177	5	Hordeum vulgare	cis-acting regulatory element involved in the MeJA-responsiveness
TaACO1	CGTCA-motif	CGTCA	1422	5	Hordeum vulgare	cis-acting regulatory element involved in the MeJA-responsiveness
TaACO1	TCT-motif	TCTTAC	1690	6	Arabidopsis thaliana	part of a light responsive element
TaACO1	P-box	CCTTTTG	765	7	Oryza sativa	gibberellin-responsive element
TaACO2	MBSI	aaaAaaC(G/C)GTTA	493	10.5	Petunia hybrida	MYB binding site involved in flavonoid biosynthetic genes regulation
TaACO2	TGACG-motif	TGACG	562	5	Hordeum vulgare	cis-acting regulatory element involved in the MeJA-responsiveness
TaACO2	TCCC-motif	TCTCCCT	1247	7	Spinacia oleracea	part of a light responsive element
TaACO2	CGTCA-motif	CGTCA	562	5	Hordeum vulgare	cis-acting regulatory element involved in the MeJA-responsiveness
TaACO2	G-box	TACGTG	1633	6	Arabidopsis thaliana	cis-acting regulatory element involved in light responsiveness
TaACO2	ABRE	GACACGTGGC	695	9	Triticum aestivum	cis-acting element involved in the abscisic acid responsiveness
TaACO2	ABRE	GACACGTACGT	1631	10	Oryza sativa	cis-acting element involved in the abscisic acid responsiveness
TaACO2	ABRE	ACGTG	1633	5	Arabidopsis thaliana	cis-acting element involved in the abscisic acid responsiveness
TaACO2	GTGGC-motif	CATCGTGTGGC	1670	10	Arabidopsis thaliana	part of a light responsive element
TaACO2	ARE	AAACCA	851	6	Zea mays	cis-acting regulatory element essential for the anaerobic induction
TaACO2	Box 4	ATTAAT	375	6	Petroselinum crispum	part of a conserved DNA module involved in light responsiveness
TaACO2	Box 4	ATTAAT	484	6	Petroselinum crispum	part of a conserved DNA module involved in light responsiveness
TaACO2	AE-box	AGAAACTT	347	8	Arabidopsis thaliana	part of a module for light response
TaACO3	CAT-box	GCCACT	1416	6	Arabidopsis thaliana	cis-acting regulatory element related to meristem expression
TaACO3	TCA-element	CCATCTTTTT	839	9	Nicotiana tabacum	cis-acting element involved in salicylic acid responsiveness
TaACO3	ARE	AAACCA	188	6	Zea mays	cis-acting regulatory element essential for the anaerobic induction
TaACO3	ARE	AAACCA	1816	6	Zea mays	cis-acting regulatory element essential for the anaerobic induction
TaACO3	TGACG-motif	TGACG	980	5	Hordeum vulgare	cis-acting regulatory element involved in the MeJA-responsiveness
TaACO3	TGACG-motif	TGACG	1706	5	Hordeum vulgare	cis-acting regulatory element involved in the MeJA-responsiveness
TaACO3	TGACG-motif	TGACG	1941	5	Hordeum vulgare	cis-acting regulatory element involved in the MeJA-responsiveness
TaACO3	MBS	CAACTG	1127	6	Arabidopsis thaliana	MYB binding site involved in drought-inducibility
TaACO3	ABRE	CACGTG	706	6	Arabidopsis thaliana	cis-acting element involved in the abscisic acid responsiveness
TaACO3	ABRE	ACGTG	707	5	Arabidopsis thaliana	cis-acting element involved in the abscisic acid responsiveness
TaACO3	G-box	CACGTG	706	6	Arabidopsis thaliana	cis-acting regulatory element involved in light responsiveness
TaACO3	G-box	GCCACGTGGA	1760	9	Arabidopsis thaliana	cis-acting regulatory element involved in light responsiveness
TaACO3	G-box	CACGAC	1881	6	Zea mays	cis-acting regulatory element involved in light responsiveness
TaACO3	G-Box	CACGTG	706	6	Pisum sativum	cis-acting regulatory element involved in light responsiveness
TaACO3	LTR	CCGAAA	1005	6	Hordeum vulgare	cis-acting element involved in low-temperature responsiveness
TaACO3	LTR	CCGAAA	1327	6	Hordeum vulgare	cis-acting element involved in low-temperature responsiveness
TaACO3	LTR	CCGAAA	1934	6	Hordeum vulgare	cis-acting element involved in low-temperature responsiveness
TaACO3	TGA-element	AACGAC	718	6	Brassica oleracea	auxin-responsive element
TaACO3	TGA-element	AACGAC	1777	6	Brassica oleracea	auxin-responsive element
TaACO3	CGTCA-motif	CGTCA	980	5	Hordeum vulgare	cis-acting regulatory element involved in the MeJA-responsiveness
TaACO3	CGTCA-motif	CGTCA	1706	5	Hordeum vulgare	cis-acting regulatory element involved in the MeJA-responsiveness
TaACO3	CGTCA-motif	CGTCA	1941	5	Hordeum vulgare	cis-acting regulatory element involved in the MeJA-responsiveness
TaACO3	MSA-like	(T/C)C(T/C)AACGG(T/C)(T/C)A	1753	8.5	Catharanthus roseus	cis-acting element involved in cell cycle regulation
TaACO3	GARE-motif	TCTGTTG	1185	7	Brassica oleracea	gibberellin-responsive element
TaACO3	GARE-motif	TCTGTTG	1735	7	Brassica oleracea	gibberellin-responsive element
TaACO4	MBS	CAACTG	1831	6	Arabidopsis thaliana	MYB binding site involved in drought-inducibility
TaACO4	LAMP-element	CTTTATCA	1303	8	Pisum sativum	part of a light responsive element
TaACO4	circadian	CAAAGATATC	1276	9	Lycopersicon esculentum	cis-acting regulatory element involved in circadian control
TaACO4	G-box	TACGTG	142	6	Arabidopsis thaliana	cis-acting regulatory element involved in light responsiveness
TaACO4	G-box	CACGTC	360	6	Zea mays	cis-acting regulatory element involved in light responsiveness
TaACO4	G-box	CACGTG	658	6	Arabidopsis thaliana	cis-acting regulatory element involved in light responsiveness
TaACO4	G-box	TACGTG	1285	6	Arabidopsis thaliana	cis-acting regulatory element involved in light responsiveness
TaACO4	G-box	CACGAC	1320	6	Zea mays	cis-acting regulatory element involved in light responsiveness
TaACO4	G-box	TACGTG	1328	6	Arabidopsis thaliana	cis-acting regulatory element involved in light responsiveness
TaACO4	G-box	CACGTG	1818	6	Arabidopsis thaliana	cis-acting regulatory element involved in light responsiveness
TaACO4	G-box	CACGTC	1825	6	Zea mays	cis-acting regulatory element involved in light responsiveness
TaACO4	TGACG-motif	TGACG	793	5	Hordeum vulgare	cis-acting regulatory element involved in the MeJA-responsiveness
TaACO4	TGACG-motif	TGACG	881	5	Hordeum vulgare	cis-acting regulatory element involved in the MeJA-responsiveness
TaACO4	TGACG-motif	TGACG	997	5	Hordeum vulgare	cis-acting regulatory element involved in the MeJA-responsiveness
TaACO4	TGACG-motif	TGACG	1040	5	Hordeum vulgare	cis-acting regulatory element involved in the MeJA-responsiveness
TaACO4	TGA-element	AACGAC	524	6	Brassica oleracea	auxin-responsive element
TaACO4	TGA-element	AACGAC	545	6	Brassica oleracea	auxin-responsive element
TaACO4	CAT-box	GCCACT	427	6	Arabidopsis thaliana	cis-acting regulatory element related to meristem expression
TaACO4	CAT-box	GCCACT	1857	6	Arabidopsis thaliana	cis-acting regulatory element related to meristem expression
TaACO4	Box 4	ATTAAT	210	6	Petroselinum crispum	part of a conserved DNA module involved in light responsiveness
TaACO4	Box 4	ATTAAT	809	6	Petroselinum crispum	part of a conserved DNA module involved in light responsiveness
TaACO4	GATA-motif	GATAGGG	1806	7	Pisum sativum	part of a light responsive element
TaACO4	ATCT-motif	AATCTAATCC	481	9	Pisum sativum	part of a conserved DNA module involved in light responsiveness
TaACO4	ABRE	ACGTG	143	5	Arabidopsis thaliana	cis-acting element involved in the abscisic acid responsiveness
TaACO4	ABRE	ACGTG	360	5	Arabidopsis thaliana	cis-acting element involved in the abscisic acid responsiveness
TaACO4	ABRE	CACGTG	658	6	Arabidopsis thaliana	cis-acting element involved in the abscisic acid responsiveness
TaACO4	ABRE	ACGTG	659	5	Arabidopsis thaliana	cis-acting element involved in the abscisic acid responsiveness
TaACO4	ABRE	ACGTG	1285	5	Arabidopsis thaliana	cis-acting element involved in the abscisic acid responsiveness
TaACO4	ABRE	CGTACGTGCA	1326	9	Hordeum vulgare	cis-acting element involved in the abscisic acid responsiveness
TaACO4	ABRE	ACGTG	1328	5	Arabidopsis thaliana	cis-acting element involved in the abscisic acid responsiveness
TaACO4	ABRE	CACGTG	1818	6	Arabidopsis thaliana	cis-acting element involved in the abscisic acid responsiveness
TaACO4	ABRE	ACGTG	1819	5	Arabidopsis thaliana	cis-acting element involved in the abscisic acid responsiveness
TaACO4	ABRE	ACGTG	1825	5	Arabidopsis thaliana	cis-acting element involved in the abscisic acid responsiveness
TaACO4	TCT-motif	TCTTAC	1331	6	Arabidopsis thaliana	part of a light responsive element
TaACO4	G-Box	CACGTG	658	6	Pisum sativum	cis-acting regulatory element involved in light responsiveness
TaACO4	G-Box	CACGTG	1818	6	Pisum sativum	cis-acting regulatory element involved in light responsiveness
TaACO4	TCCC-motif	TCTCCCT	1960	7	Spinacia oleracea	part of a light responsive element
TaACO4	TCA-element	CCATCTTTTT	832	9	Nicotiana tabacum	cis-acting element involved in salicylic acid responsiveness
TaACO4	CCAAT-box	CAACGG	908	6	Hordeum vulgare	MYBHv1 binding site
TaACO4	CCAAT-box	CAACGG	1024	6	Hordeum vulgare	MYBHv1 binding site
TaACO4	LTR	CCGAAA	90	6	Hordeum vulgare	cis-acting element involved in low-temperature responsiveness
TaACO4	CGTCA-motif	CGTCA	793	5	Hordeum vulgare	cis-acting regulatory element involved in the MeJA-responsiveness
TaACO4	CGTCA-motif	CGTCA	881	5	Hordeum vulgare	cis-acting regulatory element involved in the MeJA-responsiveness
TaACO4	CGTCA-motif	CGTCA	997	5	Hordeum vulgare	cis-acting regulatory element involved in the MeJA-responsiveness
TaACO4	CGTCA-motif	CGTCA	1040	5	Hordeum vulgare	cis-acting regulatory element involved in the MeJA-responsiveness
TaACO5	ABRE	GCCGCGTGGC	82	9	Oryza sativa	cis-acting element involved in the abscisic acid responsiveness
TaACO5	ABRE	ACGTG	495	5	Arabidopsis thaliana	cis-acting element involved in the abscisic acid responsiveness
TaACO5	ABRE	ACGTG	1567	5	Arabidopsis thaliana	cis-acting element involved in the abscisic acid responsiveness
TaACO5	ABRE	CGTACGTGCA	1608	9	Hordeum vulgare	cis-acting element involved in the abscisic acid responsiveness
TaACO5	ABRE	ACGTG	1610	5	Arabidopsis thaliana	cis-acting element involved in the abscisic acid responsiveness
TaACO5	ABRE	CACGTG	1818	6	Arabidopsis thaliana	cis-acting element involved in the abscisic acid responsiveness
TaACO5	ABRE	ACGTG	1819	5	Arabidopsis thaliana	cis-acting element involved in the abscisic acid responsiveness
TaACO5	ABRE	ACGTG	1825	5	Arabidopsis thaliana	cis-acting element involved in the abscisic acid responsiveness
TaACO5	ARE	AAACCA	31	6	Zea mays	cis-acting regulatory element essential for the anaerobic induction
TaACO5	ARE	AAACCA	365	6	Zea mays	cis-acting regulatory element essential for the anaerobic induction
TaACO5	ARE	AAACCA	586	6	Zea mays	cis-acting regulatory element essential for the anaerobic induction
TaACO5	ARE	AAACCA	626	6	Zea mays	cis-acting regulatory element essential for the anaerobic induction
TaACO5	ARE	AAACCA	717	6	Zea mays	cis-acting regulatory element essential for the anaerobic induction
TaACO5	ARE	AAACCA	759	6	Zea mays	cis-acting regulatory element essential for the anaerobic induction
TaACO5	ARE	AAACCA	764	6	Zea mays	cis-acting regulatory element essential for the anaerobic induction
TaACO5	CGTCA-motif	CGTCA	27	5	Hordeum vulgare	cis-acting regulatory element involved in the MeJA-responsiveness
TaACO5	CGTCA-motif	CGTCA	375	5	Hordeum vulgare	cis-acting regulatory element involved in the MeJA-responsiveness
TaACO5	CGTCA-motif	CGTCA	1072	5	Hordeum vulgare	cis-acting regulatory element involved in the MeJA-responsiveness
TaACO5	CGTCA-motif	CGTCA	1160	5	Hordeum vulgare	cis-acting regulatory element involved in the MeJA-responsiveness
TaACO5	CGTCA-motif	CGTCA	1276	5	Hordeum vulgare	cis-acting regulatory element involved in the MeJA-responsiveness
TaACO5	LAMP-element	CTTTATCA	1585	8	Pisum sativum	part of a light responsive element
TaACO5	TGA-element	AACGAC	859	6	Brassica oleracea	auxin-responsive element
TaACO5	TGA-element	AACGAC	880	6	Brassica oleracea	auxin-responsive element
TaACO5	MBS	CAACTG	1831	6	Arabidopsis thaliana	MYB binding site involved in drought-inducibility
TaACO5	GCN4_motif	TGAGTCA	412	7	Oryza sativa	cis-regulatory element involved in endosperm expression
TaACO5	G-Box	CACGTG	1818	6	Pisum sativum	cis-acting regulatory element involved in light responsiveness
TaACO5	LTR	CCGAAA	132	6	Hordeum vulgare	cis-acting element involved in low-temperature responsiveness
TaACO5	LTR	CCGAAA	336	6	Hordeum vulgare	cis-acting element involved in low-temperature responsiveness
TaACO5	TCCC-motif	TCTCCCT	1626	7	Spinacia oleracea	part of a light responsive element
TaACO5	TCCC-motif	TCTCCCT	1960	7	Spinacia oleracea	part of a light responsive element
TaACO5	P-box	CCTTTTG	1217	7	Oryza sativa	gibberellin-responsive element
TaACO5	GATA-motif	GATAGGG	1806	7	Pisum sativum	part of a light responsive element
TaACO5	TGACG-motif	TGACG	27	5	Hordeum vulgare	cis-acting regulatory element involved in the MeJA-responsiveness
TaACO5	TGACG-motif	TGACG	375	5	Hordeum vulgare	cis-acting regulatory element involved in the MeJA-responsiveness
TaACO5	TGACG-motif	TGACG	1072	5	Hordeum vulgare	cis-acting regulatory element involved in the MeJA-responsiveness
TaACO5	TGACG-motif	TGACG	1160	5	Hordeum vulgare	cis-acting regulatory element involved in the MeJA-responsiveness
TaACO5	TGACG-motif	TGACG	1276	5	Hordeum vulgare	cis-acting regulatory element involved in the MeJA-responsiveness
TaACO5	CCAAT-box	CAACGG	1187	6	Hordeum vulgare	MYBHv1 binding site
TaACO5	CCAAT-box	CAACGG	1333	6	Hordeum vulgare	MYBHv1 binding site
TaACO5	Box 4	ATTAAT	158	6	Petroselinum crispum	part of a conserved DNA module involved in light responsiveness
TaACO5	Box 4	ATTAAT	1088	6	Petroselinum crispum	part of a conserved DNA module involved in light responsiveness
TaACO5	G-box	CACGTC	494	6	Zea mays	cis-acting regulatory element involved in light responsiveness
TaACO5	G-box	TACGTG	1567	6	Arabidopsis thaliana	cis-acting regulatory element involved in light responsiveness
TaACO5	G-box	CACGAC	1602	6	Zea mays	cis-acting regulatory element involved in light responsiveness
TaACO5	G-box	TACGTG	1610	6	Arabidopsis thaliana	cis-acting regulatory element involved in light responsiveness
TaACO5	G-box	CACGTG	1818	6	Arabidopsis thaliana	cis-acting regulatory element involved in light responsiveness
TaACO5	G-box	CACGTC	1825	6	Zea mays	cis-acting regulatory element involved in light responsiveness
TaACO6	GATA-motif	GATAGGA	903	7	Arabidopsis thaliana	part of a light responsive element
TaACO6	GATA-motif	AAGGATAAGG	1434	9	Solanum tuberosum	part of a light responsive element
TaACO6	GATA-motif	AAGATAAGATT	1632	10	Arabidopsis thaliana	part of a light responsive element
TaACO6	GATA-motif	GATAGGA	1874	7	Arabidopsis thaliana	part of a light responsive element
TaACO6	ABRE	ACGTG	470	5	Arabidopsis thaliana	cis-acting element involved in the abscisic acid responsiveness
TaACO6	Box 4	ATTAAT	1329	6	Petroselinum crispum	part of a conserved DNA module involved in light responsiveness
TaACO6	Box 4	ATTAAT	1722	6	Petroselinum crispum	part of a conserved DNA module involved in light responsiveness
TaACO6	chs-CMA2a	TCACTTGA	1485	8	Petroselinum crispum	part of a light responsive element
TaACO6	ATCT-motif	AATCTAATCC	316	9	Pisum sativum	part of a conserved DNA module involved in light responsiveness
TaACO6	I-box	cCATATCCAAT	882	10	Flaveria trinervia	part of a light responsive element
TaACO6	MBS	CAACTG	817	6	Arabidopsis thaliana	MYB binding site involved in drought-inducibility
TaACO6	MBS	CAACTG	1267	6	Arabidopsis thaliana	MYB binding site involved in drought-inducibility
TaACO6	MBS	CAACTG	1880	6	Arabidopsis thaliana	MYB binding site involved in drought-inducibility
TaACO6	MBS	CAACTG	1958	6	Arabidopsis thaliana	MYB binding site involved in drought-inducibility
TaACO6	MBS	CAACTG	1974	6	Arabidopsis thaliana	MYB binding site involved in drought-inducibility
TaACO6	O2-site	GATGA(C/T)(A/G)TG(A/G)	575	8	Zea mays	cis-acting regulatory element involved in zein metabolism regulation
TaACO6	O2-site	GATGATGTGG	1178	10	Zea mays	cis-acting regulatory element involved in zein metabolism regulation
TaACO6	O2-site	GATGA(C/T)(A/G)TG(A/G)	1222	8	Zea mays	cis-acting regulatory element involved in zein metabolism regulation
TaACO6	O2-site	GATGA(C/T)(A/G)TG(A/G)	1794	8	Zea mays	cis-acting regulatory element involved in zein metabolism regulation
TaACO6	CGTCA-motif	CGTCA	499	5	Hordeum vulgare	cis-acting regulatory element involved in the MeJA-responsiveness
TaACO6	CGTCA-motif	CGTCA	1052	5	Hordeum vulgare	cis-acting regulatory element involved in the MeJA-responsiveness
TaACO6	GC-motif	CCCCCG	6	6	Zea mays	enhancer-like element involved in anoxic specific inducibility
TaACO6	G-Box	CACGTT	470	6	Pisum sativum	cis-acting regulatory element involved in light responsiveness
TaACO6	TGACG-motif	TGACG	499	5	Hordeum vulgare	cis-acting regulatory element involved in the MeJA-responsiveness
TaACO6	TGACG-motif	TGACG	1052	5	Hordeum vulgare	cis-acting regulatory element involved in the MeJA-responsiveness
TaACO7	Box 4	ATTAAT	154	6	Petroselinum crispum	part of a conserved DNA module involved in light responsiveness
TaACO7	Box 4	ATTAAT	1089	6	Petroselinum crispum	part of a conserved DNA module involved in light responsiveness
TaACO7	P-box	CCTTTTG	407	7	Oryza sativa	gibberellin-responsive element
TaACO7	MBSI	aaaAaaC(G/C)GTTA	370	10.5	Petunia hybrida	MYB binding site involved in flavonoid biosynthetic genes regulation
TaACO7	Box II	ACACGTTGT	1131	9	Sinapis alba	part of a light responsive element
TaACO7	ARE	AAACCA	958	6	Zea mays	cis-acting regulatory element essential for the anaerobic induction
TaACO7	ARE	AAACCA	966	6	Zea mays	cis-acting regulatory element essential for the anaerobic induction
TaACO7	ARE	AAACCA	1755	6	Zea mays	cis-acting regulatory element essential for the anaerobic induction
TaACO7	AT-rich element	ATAGAAATCAA	1019	10	Glycine max	binding site of AT-rich DNA binding protein (ATBP-1)
TaACO7	CAT-box	GCCACT	620	6	Arabidopsis thaliana	cis-acting regulatory element related to meristem expression
TaACO7	G-Box	CACGTT	1133	6	Pisum sativum	cis-acting regulatory element involved in light responsiveness
TaACO7	TGA-element	AACGAC	492	6	Brassica oleracea	auxin-responsive element
TaACO7	TGA-element	AACGAC	876	6	Brassica oleracea	auxin-responsive element
TaACO7	Sp1	GGGCGG	1521	6	Oryza sativa	light responsive element
TaACO7	Sp1	GGGCGG	1951	6	Oryza sativa	light responsive element
TaACO8	Box 4	ATTAAT	858	6	Petroselinum crispum	part of a conserved DNA module involved in light responsiveness
TaACO8	Box 4	ATTAAT	1568	6	Petroselinum crispum	part of a conserved DNA module involved in light responsiveness
TaACO8	MSA-like	TCCAACGGT	472	9	Catharanthus roseus	cis-acting element involved in cell cycle regulation
TaACO8	GTGGC-motif	CAGCGTGTGGC	762	10	Hordeum vulgare	part of a light responsive element
TaACO8	GARE-motif	TCTGTTG	881	7	Brassica oleracea	gibberellin-responsive element
TaACO8	ARE	AAACCA	1286	6	Zea mays	cis-acting regulatory element essential for the anaerobic induction
TaACO8	CAT-box	GCCACT	457	6	Arabidopsis thaliana	cis-acting regulatory element related to meristem expression
TaACO8	CAT-box	GCCACT	563	6	Arabidopsis thaliana	cis-acting regulatory element related to meristem expression
TaACO8	CAT-box	GCCACT	751	6	Arabidopsis thaliana	cis-acting regulatory element related to meristem expression
TaACO8	G-Box	CACGTG	549	6	Pisum sativum	cis-acting regulatory element involved in light responsiveness
TaACO8	G-Box	CACGTG	1023	6	Pisum sativum	cis-acting regulatory element involved in light responsiveness
TaACO8	G-box	CACGTG	549	6	Arabidopsis thaliana	cis-acting regulatory element involved in light responsiveness
TaACO8	G-box	TACGTG	728	6	Arabidopsis thaliana	cis-acting regulatory element involved in light responsiveness
TaACO8	G-box	CACGTG	1023	6	Arabidopsis thaliana	cis-acting regulatory element involved in light responsiveness
TaACO8	ABRE	CACGTG	549	6	Arabidopsis thaliana	cis-acting element involved in the abscisic acid responsiveness
TaACO8	ABRE	ACGTG	550	5	Arabidopsis thaliana	cis-acting element involved in the abscisic acid responsiveness
TaACO8	ABRE	ACGTG	728	5	Arabidopsis thaliana	cis-acting element involved in the abscisic acid responsiveness
TaACO8	ABRE	CACGTG	1023	6	Arabidopsis thaliana	cis-acting element involved in the abscisic acid responsiveness
TaACO8	ABRE	ACGTG	1024	5	Arabidopsis thaliana	cis-acting element involved in the abscisic acid responsiveness
TaACO8	O2-site	GATGACATGG	130	9	Zea mays	cis-acting regulatory element involved in zein metabolism regulation
TaACO8	AT-rich element	ATAGAAATCAA	1749	10	Glycine max	binding site of AT-rich DNA binding protein (ATBP-1)
TaACO8	Sp1	GGGCGG	512	6	Oryza sativa	light responsive element
TaACO8	CCAAT-box	CAACGG	473	6	Hordeum vulgare	MYBHv1 binding site
TaACO8	CCAAT-box	CAACGG	1722	6	Hordeum vulgare	MYBHv1 binding site
TaACO8	CCAAT-box	CAACGG	1796	6	Hordeum vulgare	MYBHv1 binding site
TaACO8	chs-CMA1a	TTACTTAA	36	8	Daucus carota	part of a light responsive element
TaACO8	TGA-element	AACGAC	1361	6	Brassica oleracea	auxin-responsive element
TaACO9	Box 4	ATTAAT	1760	6	Petroselinum crispum	part of a conserved DNA module involved in light responsiveness
TaACO9	G-Box	CACGTT	218	6	Pisum sativum	cis-acting regulatory element involved in light responsiveness
TaACO9	G-Box	CACGTT	332	6	Pisum sativum	cis-acting regulatory element involved in light responsiveness
TaACO9	CCAAT-box	CAACGG	183	6	Hordeum vulgare	MYBHv1 binding site
TaACO9	CCAAT-box	CAACGG	615	6	Hordeum vulgare	MYBHv1 binding site
TaACO9	ARE	AAACCA	1387	6	Zea mays	cis-acting regulatory element essential for the anaerobic induction
TaACO9	ARE	AAACCA	1469	6	Zea mays	cis-acting regulatory element essential for the anaerobic induction
TaACO9	ARE	AAACCA	1692	6	Zea mays	cis-acting regulatory element essential for the anaerobic induction
TaACO9	GATA-motif	AAGGATAAGG	348	9	Solanum tuberosum	part of a light responsive element
TaACO9	TGACG-motif	TGACG	254	5	Hordeum vulgare	cis-acting regulatory element involved in the MeJA-responsiveness
TaACO9	TGACG-motif	TGACG	263	5	Hordeum vulgare	cis-acting regulatory element involved in the MeJA-responsiveness
TaACO9	TGACG-motif	TGACG	1142	5	Hordeum vulgare	cis-acting regulatory element involved in the MeJA-responsiveness
TaACO9	CGTCA-motif	CGTCA	254	5	Hordeum vulgare	cis-acting regulatory element involved in the MeJA-responsiveness
TaACO9	CGTCA-motif	CGTCA	263	5	Hordeum vulgare	cis-acting regulatory element involved in the MeJA-responsiveness
TaACO9	CGTCA-motif	CGTCA	1142	5	Hordeum vulgare	cis-acting regulatory element involved in the MeJA-responsiveness
TaACO9	LAMP-element	CCTTATCCA	348	9	Spinacia oleracea	part of a light responsive element
TaACO9	GC-motif	CCCCCG	931	6	Zea mays	enhancer-like element involved in anoxic specific inducibility
TaACO9	GC-motif	CCCCCG	1846	6	Zea mays	enhancer-like element involved in anoxic specific inducibility
TaACO9	4cl-CMA2b	TCTCACCAACCCCA	1945	13	Petroselinum crispum	light responsive element
TaACO9	TGA-element	AACGAC	1299	6	Brassica oleracea	auxin-responsive element
TaACO9	MBS	CAACTG	69	6	Arabidopsis thaliana	MYB binding site involved in drought-inducibility
TaACO9	G-box	CACGAC	21	6	Zea mays	cis-acting regulatory element involved in light responsiveness
TaACO9	G-box	CACGTC	52	6	Zea mays	cis-acting regulatory element involved in light responsiveness
TaACO9	G-box	TACGTG	86	6	Arabidopsis thaliana	cis-acting regulatory element involved in light responsiveness
TaACO9	G-box	TACGTG	94	6	Arabidopsis thaliana	cis-acting regulatory element involved in light responsiveness
TaACO9	G-box	TACGTG	418	6	Arabidopsis thaliana	cis-acting regulatory element involved in light responsiveness
TaACO9	G-box	TACGTG	1073	6	Arabidopsis thaliana	cis-acting regulatory element involved in light responsiveness
TaACO9	G-box	CAGACGTGGCA	1228	10	Nicotiana plumbaginifolia	cis-acting regulatory element involved in light responsiveness
TaACO9	G-box	CACGAC	1670	6	Zea mays	cis-acting regulatory element involved in light responsiveness
TaACO9	O2-site	GATGACATGG	321	9	Zea mays	cis-acting regulatory element involved in zein metabolism regulation
TaACO9	RY-element	CATGCATG	790	8	Helianthus annuus	cis-acting regulatory element involved in seed-specific regulation
TaACO9	RY-element	CATGCATG	794	8	Helianthus annuus	cis-acting regulatory element involved in seed-specific regulation
TaACO9	RY-element	CATGCATG	1527	8	Helianthus annuus	cis-acting regulatory element involved in seed-specific regulation
TaACO9	I-box	gGATAAGGTG	346	10	Zea mays	part of a light responsive element
TaACO9	I-box	gGATAAGGTG	781	9	Zea mays	part of a light responsive element
TaACO9	GT1-motif	GGTTAA	1023	6	Arabidopsis thaliana	light responsive element
TaACO9	GT1-motif	GGTTAAT	1081	7	Avena sativa	light responsive element
TaACO9	GT1-motif	GTGTGTGAA	1171	9	Solanum tuberosum	light responsive element
TaACO9	GT1-motif	GGTTAA	1885	6	Arabidopsis thaliana	light responsive element
TaACO9	GT1-motif	GGTTAA	1887	6	Arabidopsis thaliana	light responsive element
TaACO9	ABRE	ACGTG	52	5	Arabidopsis thaliana	cis-acting element involved in the abscisic acid responsiveness
TaACO9	ABRE	ACGTG	86	5	Arabidopsis thaliana	cis-acting element involved in the abscisic acid responsiveness
TaACO9	ABRE	ACGTG	94	5	Arabidopsis thaliana	cis-acting element involved in the abscisic acid responsiveness
TaACO9	ABRE	ACGTG	219	5	Arabidopsis thaliana	cis-acting element involved in the abscisic acid responsiveness
TaACO9	ABRE	ACGTG	333	5	Arabidopsis thaliana	cis-acting element involved in the abscisic acid responsiveness
TaACO9	ABRE	ACGTG	418	5	Arabidopsis thaliana	cis-acting element involved in the abscisic acid responsiveness
TaACO9	ABRE	ACGTG	1074	5	Arabidopsis thaliana	cis-acting element involved in the abscisic acid responsiveness
TaACO10	Box 4	ATTAAT	296	6	Petroselinum crispum	part of a conserved DNA module involved in light responsiveness
TaACO10	GATA-motif	GATAGGA	1091	7	Arabidopsis thaliana	part of a light responsive element
TaACO10	CAT-box	GCCACT	7	6	Arabidopsis thaliana	cis-acting regulatory element related to meristem expression
TaACO10	ABRE	ACGTG	166	5	Arabidopsis thaliana	cis-acting element involved in the abscisic acid responsiveness
TaACO10	ABRE	ACGTG	996	5	Arabidopsis thaliana	cis-acting element involved in the abscisic acid responsiveness
TaACO10	ABRE	GCCGCGTGGC	1500	9	Oryza sativa	cis-acting element involved in the abscisic acid responsiveness
TaACO10	ABRE	ACGTG	1862	5	Arabidopsis thaliana	cis-acting element involved in the abscisic acid responsiveness
TaACO10	TCT-motif	TCTTAC	322	6	Arabidopsis thaliana	part of a light responsive element
TaACO10	TCT-motif	TCTTAC	678	6	Arabidopsis thaliana	part of a light responsive element
TaACO10	MBS	CAACTG	983	6	Arabidopsis thaliana	MYB binding site involved in drought-inducibility
TaACO10	CCAAT-box	CAACGG	693	6	Hordeum vulgare	MYBHv1 binding site
TaACO10	CCAAT-box	CAACGG	1728	6	Hordeum vulgare	MYBHv1 binding site
TaACO10	CCAAT-box	CAACGG	1787	6	Hordeum vulgare	MYBHv1 binding site
TaACO10	TGACG-motif	TGACG	687	5	Hordeum vulgare	cis-acting regulatory element involved in the MeJA-responsiveness
TaACO10	TCCC-motif	TCTCCCT	346	7	Spinacia oleracea	part of a light responsive element
TaACO10	Sp1	GGGCGG	1509	6	Oryza sativa	light responsive element
TaACO10	TGA-element	AACGAC	1420	6	Brassica oleracea	auxin-responsive element
TaACO10	CGTCA-motif	CGTCA	687	5	Hordeum vulgare	cis-acting regulatory element involved in the MeJA-responsiveness
TaACO10	G-box	TACGTG	166	6	Arabidopsis thaliana	cis-acting regulatory element involved in light responsiveness
TaACO10	G-box	CACGTC	996	6	Zea mays	cis-acting regulatory element involved in light responsiveness
TaACO10	G-box	TACGTG	1862	6	Arabidopsis thaliana	cis-acting regulatory element involved in light responsiveness
TaACO11	CGTCA-motif	CGTCA	458	5	Hordeum vulgare	cis-acting regulatory element involved in the MeJA-responsiveness
TaACO11	CGTCA-motif	CGTCA	574	5	Hordeum vulgare	cis-acting regulatory element involved in the MeJA-responsiveness
TaACO11	CGTCA-motif	CGTCA	1105	5	Hordeum vulgare	cis-acting regulatory element involved in the MeJA-responsiveness
TaACO11	G-box	CACGTC	456	6	Zea mays	cis-acting regulatory element involved in light responsiveness
TaACO11	G-box	TAACACGTAG	601	9	Brassica oleracea	cis-acting regulatory element involved in light responsiveness
TaACO11	CCAAT-box	CAACGG	210	6	Hordeum vulgare	MYBHv1 binding site
TaACO11	AE-box	AGAAACTT	1241	8	Arabidopsis thaliana	part of a module for light response
TaACO11	TGACG-motif	TGACG	458	5	Hordeum vulgare	cis-acting regulatory element involved in the MeJA-responsiveness
TaACO11	TGACG-motif	TGACG	574	5	Hordeum vulgare	cis-acting regulatory element involved in the MeJA-responsiveness
TaACO11	TGACG-motif	TGACG	1105	5	Hordeum vulgare	cis-acting regulatory element involved in the MeJA-responsiveness
TaACO11	ABRE	ACGTG	456	5	Arabidopsis thaliana	cis-acting element involved in the abscisic acid responsiveness
TaACO11	ABRE	ACGTG	652	5	Arabidopsis thaliana	cis-acting element involved in the abscisic acid responsiveness
TaACO11	GT1-motif	GGTTAA	1907	6	Arabidopsis thaliana	light responsive element
TaACO11	GT1-motif	GGTTAA	1909	6	Arabidopsis thaliana	light responsive element
TaACO11	ARE	AAACCA	112	6	Zea mays	cis-acting regulatory element essential for the anaerobic induction
TaACO11	ARE	AAACCA	304	6	Zea mays	cis-acting regulatory element essential for the anaerobic induction
TaACO11	ARE	AAACCA	935	6	Zea mays	cis-acting regulatory element essential for the anaerobic induction
TaACO11	ARE	AAACCA	1010	6	Zea mays	cis-acting regulatory element essential for the anaerobic induction
TaACO11	Box II	ACACGTTGT	651	9	Sinapis alba	part of a light responsive element
TaACO11	Sp1	GGGCGG	1952	6	Oryza sativa	light responsive element
TaACO11	LAMP-element	CTTTATCA	120	8	Pisum sativum	part of a light responsive element
TaACO11	G-Box	CACGTT	652	6	Pisum sativum	cis-acting regulatory element involved in light responsiveness
TaACO11	O2-site	GATGA(C/T)(A/G)TG(A/G)	455	8	Zea mays	cis-acting regulatory element involved in zein metabolism regulation
TaACO11	O2-site	GATGATGTGG	678	9	Zea mays	cis-acting regulatory element involved in zein metabolism regulation
TaACO11	O2-site	GATGA(C/T)(A/G)TG(A/G)	1611	8	Zea mays	cis-acting regulatory element involved in zein metabolism regulation
TaACO11	CAT-box	GCCACT	1287	6	Arabidopsis thaliana	cis-acting regulatory element related to meristem expression
TaACO12	GTGGC-motif	CAGCGTGTGGC	531	10	Hordeum vulgare	part of a light responsive element
TaACO12	Sp1	GGGCGG	230	6	Oryza sativa	light responsive element
TaACO12	G-box	CACGTC	37	6	Zea mays	cis-acting regulatory element involved in light responsiveness
TaACO12	G-box	TACGTG	85	6	Arabidopsis thaliana	cis-acting regulatory element involved in light responsiveness
TaACO12	G-box	CACGTG	308	6	Arabidopsis thaliana	cis-acting regulatory element involved in light responsiveness
TaACO12	G-box	TACGTG	497	6	Arabidopsis thaliana	cis-acting regulatory element involved in light responsiveness
TaACO12	G-box	CACGTC	1206	6	Zea mays	cis-acting regulatory element involved in light responsiveness
TaACO12	G-box	CACGTC	1252	6	Zea mays	cis-acting regulatory element involved in light responsiveness
TaACO12	G-box	CACGAC	1677	6	Zea mays	cis-acting regulatory element involved in light responsiveness
TaACO12	G-box	TACGTG	1863	6	Arabidopsis thaliana	cis-acting regulatory element involved in light responsiveness
TaACO12	G-Box	CACGTG	308	6	Pisum sativum	cis-acting regulatory element involved in light responsiveness
TaACO12	Box 4	ATTAAT	130	6	Petroselinum crispum	part of a conserved DNA module involved in light responsiveness
TaACO12	Box 4	ATTAAT	624	6	Petroselinum crispum	part of a conserved DNA module involved in light responsiveness
TaACO12	ARE	AAACCA	147	6	Zea mays	cis-acting regulatory element essential for the anaerobic induction
TaACO12	ARE	AAACCA	180	6	Zea mays	cis-acting regulatory element essential for the anaerobic induction
TaACO12	ARE	AAACCA	1051	6	Zea mays	cis-acting regulatory element essential for the anaerobic induction
TaACO12	ARE	AAACCA	1767	6	Zea mays	cis-acting regulatory element essential for the anaerobic induction
TaACO12	I-box	atGATAAGGTC	447	10	Helianthus annuus	part of a light responsive element
TaACO12	TC-rich repeats	ATTCTCTAAC	593	9	Nicotiana tabacum	cis-acting element involved in defense and stress responsiveness
TaACO12	ABRE	ACGTG	37	5	Arabidopsis thaliana	cis-acting element involved in the abscisic acid responsiveness
TaACO12	ABRE	ACGTG	85	5	Arabidopsis thaliana	cis-acting element involved in the abscisic acid responsiveness
TaACO12	ABRE	CACGTG	308	6	Arabidopsis thaliana	cis-acting element involved in the abscisic acid responsiveness
TaACO12	ABRE	ACGTG	309	5	Arabidopsis thaliana	cis-acting element involved in the abscisic acid responsiveness
TaACO12	ABRE	ACGTG	497	5	Arabidopsis thaliana	cis-acting element involved in the abscisic acid responsiveness
TaACO12	ABRE	ACGTG	1206	5	Arabidopsis thaliana	cis-acting element involved in the abscisic acid responsiveness
TaACO12	ABRE	ACGTG	1253	5	Arabidopsis thaliana	cis-acting element involved in the abscisic acid responsiveness
TaACO12	ABRE	ACGTG	1863	5	Arabidopsis thaliana	cis-acting element involved in the abscisic acid responsiveness
TaACO12	AT-rich element	ATAGAAATCAA	1526	10	Glycine max	binding site of AT-rich DNA binding protein (ATBP-1)
TaACO12	CCAAT-box	CAACGG	1499	6	Hordeum vulgare	MYBHv1 binding site
TaACO12	CCAAT-box	CAACGG	1574	6	Hordeum vulgare	MYBHv1 binding site
TaACO12	CCAAT-box	CAACGG	1795	6	Hordeum vulgare	MYBHv1 binding site
TaACO12	TGACG-motif	TGACG	39	5	Hordeum vulgare	cis-acting regulatory element involved in the MeJA-responsiveness
TaACO12	TGACG-motif	TGACG	342	5	Hordeum vulgare	cis-acting regulatory element involved in the MeJA-responsiveness
TaACO12	TGA-element	AACGAC	1124	6	Brassica oleracea	auxin-responsive element
TaACO12	TGA-element	AACGAC	1720	6	Brassica oleracea	auxin-responsive element
TaACO12	CGTCA-motif	CGTCA	39	5	Hordeum vulgare	cis-acting regulatory element involved in the MeJA-responsiveness
TaACO12	CGTCA-motif	CGTCA	342	5	Hordeum vulgare	cis-acting regulatory element involved in the MeJA-responsiveness
TaACO12	GARE-motif	TCTGTTG	647	7	Brassica oleracea	gibberellin-responsive element
TaACO13	4cl-CMA2b	TCTCACCAACCCCA	1946	13	Petroselinum crispum	light responsive element
TaACO13	TGA-element	AACGAC	686	6	Brassica oleracea	auxin-responsive element
TaACO13	P-box	CCTTTTG	726	7	Oryza sativa	gibberellin-responsive element
TaACO13	LTR	CCGAAA	1368	6	Hordeum vulgare	cis-acting element involved in low-temperature responsiveness
TaACO13	G-box	CACGTG	1093	6	Arabidopsis thaliana	cis-acting regulatory element involved in light responsiveness
TaACO13	G-box	TACGTG	1106	6	Arabidopsis thaliana	cis-acting regulatory element involved in light responsiveness
TaACO13	G-box	CAGACGTGGCA	1192	10	Nicotiana plumbaginifolia	cis-acting regulatory element involved in light responsiveness
TaACO13	G-box	CACGAC	1915	6	Zea mays	cis-acting regulatory element involved in light responsiveness
TaACO13	RY-element	CATGCATG	785	8	Helianthus annuus	cis-acting regulatory element involved in seed-specific regulation
TaACO13	RY-element	CATGCATG	799	8	Helianthus annuus	cis-acting regulatory element involved in seed-specific regulation
TaACO13	RY-element	CATGCATG	803	8	Helianthus annuus	cis-acting regulatory element involved in seed-specific regulation
TaACO13	RY-element	CATGCATG	821	8	Helianthus annuus	cis-acting regulatory element involved in seed-specific regulation
TaACO13	CCAAT-box	CAACGG	22	6	Hordeum vulgare	MYBHv1 binding site
TaACO13	CCAAT-box	CAACGG	461	6	Hordeum vulgare	MYBHv1 binding site
TaACO13	CGTCA-motif	CGTCA	636	5	Hordeum vulgare	cis-acting regulatory element involved in the MeJA-responsiveness
TaACO13	CGTCA-motif	CGTCA	1015	5	Hordeum vulgare	cis-acting regulatory element involved in the MeJA-responsiveness
TaACO13	ABRE	CACGTG	1093	6	Arabidopsis thaliana	cis-acting element involved in the abscisic acid responsiveness
TaACO13	ABRE	ACGTG	1094	5	Arabidopsis thaliana	cis-acting element involved in the abscisic acid responsiveness
TaACO13	ABRE	ACGTG	1106	5	Arabidopsis thaliana	cis-acting element involved in the abscisic acid responsiveness
TaACO13	ARE	AAACCA	1439	6	Zea mays	cis-acting regulatory element essential for the anaerobic induction
TaACO13	ARE	AAACCA	1479	6	Zea mays	cis-acting regulatory element essential for the anaerobic induction
TaACO13	GARE-motif	TCTGTTG	1425	7	Brassica oleracea	gibberellin-responsive element
TaACO13	O2-site	GATGACATGG	156	9	Zea mays	cis-acting regulatory element involved in zein metabolism regulation
TaACO13	MBSI	aaaAaaC(G/C)GTTA	304	10.5	Petunia hybrida	MYB binding site involved in flavonoid biosynthetic genes regulation
TaACO13	TGACG-motif	TGACG	636	5	Hordeum vulgare	cis-acting regulatory element involved in the MeJA-responsiveness
TaACO13	TGACG-motif	TGACG	1015	5	Hordeum vulgare	cis-acting regulatory element involved in the MeJA-responsiveness
TaACO13	GC-motif	CCCCCG	877	6	Zea mays	enhancer-like element involved in anoxic specific inducibility
TaACO13	GC-motif	CCCCCG	1826	6	Zea mays	enhancer-like element involved in anoxic specific inducibility
TaACO13	G-Box	CACGTG	1093	6	Pisum sativum	cis-acting regulatory element involved in light responsiveness
TaACO13	MBS	CAACTG	4	6	Arabidopsis thaliana	MYB binding site involved in drought-inducibility
TaACO13	GT1-motif	GGTTAAT	1044	7	Avena sativa	light responsive element
TaACO13	GT1-motif	GGTTAA	1880	6	Arabidopsis thaliana	light responsive element
TaACO13	GT1-motif	GGTTAA	1882	6	Arabidopsis thaliana	light responsive element
TaACO13	Sp1	GGGCGG	285	6	Oryza sativa	light responsive element
TaACO13	Sp1	GGGCGG	1926	6	Oryza sativa	light responsive element
TaACO14	G-box	CACGAC	805	6	Zea mays	cis-acting regulatory element involved in light responsiveness
TaACO14	G-box	CACGTC	1626	6	Zea mays	cis-acting regulatory element involved in light responsiveness
TaACO14	G-box	CACGAC	1879	6	Zea mays	cis-acting regulatory element involved in light responsiveness
TaACO14	ABRE	ACGTG	1626	5	Arabidopsis thaliana	cis-acting element involved in the abscisic acid responsiveness
TaACO14	ABRE	GCCGCGTGGC	1922	9	Oryza sativa	cis-acting element involved in the abscisic acid responsiveness
TaACO14	TGACG-motif	TGACG	1191	5	Hordeum vulgare	cis-acting regulatory element involved in the MeJA-responsiveness
TaACO14	LTR	CCGAAA	1665	6	Hordeum vulgare	cis-acting element involved in low-temperature responsiveness
TaACO14	GC-motif	CCCCCG	1467	6	Zea mays	enhancer-like element involved in anoxic specific inducibility
TaACO14	GC-motif	CCCCCG	1832	6	Zea mays	enhancer-like element involved in anoxic specific inducibility
TaACO14	GC-motif	CCCCCG	1942	6	Zea mays	enhancer-like element involved in anoxic specific inducibility
TaACO14	ARE	AAACCA	978	6	Zea mays	cis-acting regulatory element essential for the anaerobic induction
TaACO14	ARE	AAACCA	1227	6	Zea mays	cis-acting regulatory element essential for the anaerobic induction
TaACO14	CGTCA-motif	CGTCA	1191	5	Hordeum vulgare	cis-acting regulatory element involved in the MeJA-responsiveness
TaACO14	Box 4	ATTAAT	1391	6	Petroselinum crispum	part of a conserved DNA module involved in light responsiveness
TaACO14	MRE	AACCTAA	563	7	Petroselinum crispum	MYB binding site involved in light responsiveness
TaACO14	O2-site	GTTGACGTGA	383	9	Zea mays	cis-acting regulatory element involved in zein metabolism regulation
TaACO14	CAT-box	GCCACT	1403	6	Arabidopsis thaliana	cis-acting regulatory element related to meristem expression
TaACO14	MBS	CAACTG	389	6	Arabidopsis thaliana	MYB binding site involved in drought-inducibility
TaACO14	MBS	CAACTG	1546	6	Arabidopsis thaliana	MYB binding site involved in drought-inducibility
TaACO14	GARE-motif	TCTGTTG	1348	7	Brassica oleracea	gibberellin-responsive element
TaACO15	CCAAT-box	CAACGG	1023	6	Hordeum vulgare	MYBHv1 binding site
TaACO15	GA-motif	ATAGATAA	1274	8	Arabidopsis thaliana	part of a light responsive element
TaACO15	TGACG-motif	TGACG	1961	5	Hordeum vulgare	cis-acting regulatory element involved in the MeJA-responsiveness
TaACO15	ABRE	GCCGCGTGGC	33	9	Oryza sativa	cis-acting element involved in the abscisic acid responsiveness
TaACO15	ABRE	ACGTG	174	5	Arabidopsis thaliana	cis-acting element involved in the abscisic acid responsiveness
TaACO15	ABRE	CACGTG	820	6	Arabidopsis thaliana	cis-acting element involved in the abscisic acid responsiveness
TaACO15	ABRE	ACGTG	821	5	Arabidopsis thaliana	cis-acting element involved in the abscisic acid responsiveness
TaACO15	G-box	CACGTC	174	6	Zea mays	cis-acting regulatory element involved in light responsiveness
TaACO15	G-box	CACGAC	741	6	Zea mays	cis-acting regulatory element involved in light responsiveness
TaACO15	G-box	CACGAC	775	6	Zea mays	cis-acting regulatory element involved in light responsiveness
TaACO15	G-box	CACGTG	820	6	Arabidopsis thaliana	cis-acting regulatory element involved in light responsiveness
TaACO15	GT1-motif	GGTTAA	226	6	Arabidopsis thaliana	light responsive element
TaACO15	GT1-motif	GGTTAA	1723	6	Arabidopsis thaliana	light responsive element
TaACO15	MSA-like	(T/C)C(T/C)AACGG(T/C)(T/C)A	705	8.5	Catharanthus roseus	cis-acting element involved in cell cycle regulation
TaACO15	MSA-like	(T/C)C(T/C)AACGG(T/C)(T/C)A	784	8.5	Catharanthus roseus	cis-acting element involved in cell cycle regulation
TaACO15	G-Box	CACGTG	820	6	Pisum sativum	cis-acting regulatory element involved in light responsiveness
TaACO15	Box 4	ATTAAT	685	6	Petroselinum crispum	part of a conserved DNA module involved in light responsiveness
TaACO15	CGTCA-motif	CGTCA	1961	5	Hordeum vulgare	cis-acting regulatory element involved in the MeJA-responsiveness
TaACO15	ARE	AAACCA	1159	6	Zea mays	cis-acting regulatory element essential for the anaerobic induction
TaACO15	ARE	AAACCA	1187	6	Zea mays	cis-acting regulatory element essential for the anaerobic induction
TaACO15	ARE	AAACCA	1389	6	Zea mays	cis-acting regulatory element essential for the anaerobic induction
TaACO15	ARE	AAACCA	1730	6	Zea mays	cis-acting regulatory element essential for the anaerobic induction
TaACO15	MBS	CAACTG	946	6	Arabidopsis thaliana	MYB binding site involved in drought-inducibility
TaACO15	MBS	CAACTG	1208	6	Arabidopsis thaliana	MYB binding site involved in drought-inducibility
TaACO15	GC-motif	CCCCCG	53	6	Zea mays	enhancer-like element involved in anoxic specific inducibility
TaACO15	TC-rich repeats	GTTTTCTTAC	1292	9	Nicotiana tabacum	cis-acting element involved in defense and stress responsiveness
TaACO15	TGA-element	AACGAC	286	6	Brassica oleracea	auxin-responsive element

## Sheet: Table S8
Table S8. Predicted significant Go term in the TaACO gene family by AgriGo analysis.
GO Accesion	Term_type	Term	Query item	Query total	Background item	Back ground total	p-value	FDR	Entries
GO:0006099	P	tricarboxylic acid cycle	15	15	167	85761	4.4e-41	2.8e-38	// TraesCS6D02G384200 // TraesCS6D02G074300 // TraesCS3B02G213800 // TraesCS4B02G335100 // TraesCS7A02G219100 // TraesCS6B02G440200 // TraesCS2B02G181900 // TraesCS6B02G108100 // TraesCS6A02G080600 // TraesCS3D02G188200 // TraesCS7D02G223000 // TraesCS5A02G505000 // TraesCS3A02G184000 // TraesCS6A02G400000 // TraesCS3B02G213900
GO:0009060	P	aerobic respiration	15	15	404	85761	1.7e-35	5.4e-33	// TraesCS6D02G384200 // TraesCS6D02G074300 // TraesCS3B02G213800 // TraesCS4B02G335100 // TraesCS7A02G219100 // TraesCS6B02G440200 // TraesCS2B02G181900 // TraesCS6B02G108100 // TraesCS6A02G080600 // TraesCS3D02G188200 // TraesCS7D02G223000 // TraesCS5A02G505000 // TraesCS3A02G184000 // TraesCS6A02G400000 // TraesCS3B02G213900
GO:0006101	P	citrate metabolic process	11	15	35	85761	3.9e-34	8.4e-32	// TraesCS6D02G384200 // TraesCS3B02G213800 // TraesCS4B02G335100 // TraesCS7A02G219100 // TraesCS6B02G440200 // TraesCS3D02G188200 // TraesCS5A02G505000 // TraesCS7D02G223000 // TraesCS3A02G184000 // TraesCS6A02G400000 // TraesCS3B02G213900
GO:0006102	P	isocitrate metabolic process	11	15	53	85761	2.2e-32	3.5e-30	// TraesCS6D02G384200 // TraesCS3B02G213800 // TraesCS4B02G335100 // TraesCS7A02G219100 // TraesCS6B02G440200 // TraesCS3D02G188200 // TraesCS5A02G505000 // TraesCS7D02G223000 // TraesCS3A02G184000 // TraesCS6A02G400000 // TraesCS3B02G213900
GO:0045333	P	cellular respiration	15	15	714	85761	7.6e-32	9.7e-30	// TraesCS6D02G384200 // TraesCS6D02G074300 // TraesCS3B02G213800 // TraesCS4B02G335100 // TraesCS7A02G219100 // TraesCS6B02G440200 // TraesCS2B02G181900 // TraesCS6B02G108100 // TraesCS6A02G080600 // TraesCS3D02G188200 // TraesCS7D02G223000 // TraesCS5A02G505000 // TraesCS3A02G184000 // TraesCS6A02G400000 // TraesCS3B02G213900
GO:0015980	P	energy derivation by oxidation of organic compounds	15	15	828	85761	6.8e-31	7.3e-29	// TraesCS6D02G384200 // TraesCS6D02G074300 // TraesCS3B02G213800 // TraesCS4B02G335100 // TraesCS7A02G219100 // TraesCS6B02G440200 // TraesCS2B02G181900 // TraesCS6B02G108100 // TraesCS6A02G080600 // TraesCS3D02G188200 // TraesCS7D02G223000 // TraesCS5A02G505000 // TraesCS3A02G184000 // TraesCS6A02G400000 // TraesCS3B02G213900
GO:0072350	P	tricarboxylic acid metabolic process	11	15	88	85761	3.7e-30	3.4e-28	// TraesCS6D02G384200 // TraesCS3B02G213800 // TraesCS4B02G335100 // TraesCS7A02G219100 // TraesCS6B02G440200 // TraesCS3D02G188200 // TraesCS5A02G505000 // TraesCS7D02G223000 // TraesCS3A02G184000 // TraesCS6A02G400000 // TraesCS3B02G213900
GO:0006097	P	glyoxylate cycle	10	15	86	85761	5.7e-27	4.6e-25	// TraesCS6D02G384200 // TraesCS3B02G213800 // TraesCS4B02G335100 // TraesCS6B02G440200 // TraesCS3D02G188200 // TraesCS5A02G505000 // TraesCS7D02G223000 // TraesCS3A02G184000 // TraesCS6A02G400000 // TraesCS3B02G213900
GO:0046487	P	glyoxylate metabolic process	10	15	89	85761	7.8e-27	5.6e-25	// TraesCS6D02G384200 // TraesCS3B02G213800 // TraesCS4B02G335100 // TraesCS6B02G440200 // TraesCS3D02G188200 // TraesCS5A02G505000 // TraesCS7D02G223000 // TraesCS3A02G184000 // TraesCS6A02G400000 // TraesCS3B02G213900
GO:0006091	P	generation of precursor metabolites and energy	15	15	3330	85761	7.1e-22	4.6e-20	// TraesCS6D02G384200 // TraesCS6D02G074300 // TraesCS3B02G213800 // TraesCS4B02G335100 // TraesCS7A02G219100 // TraesCS6B02G440200 // TraesCS2B02G181900 // TraesCS6B02G108100 // TraesCS6A02G080600 // TraesCS3D02G188200 // TraesCS7D02G223000 // TraesCS5A02G505000 // TraesCS3A02G184000 // TraesCS6A02G400000 // TraesCS3B02G213900
GO:0044262	P	cellular carbohydrate metabolic process	14	15	4044	85761	3.9e-18	2.3e-16	// TraesCS6D02G384200 // TraesCS6D02G074300 // TraesCS3B02G213800 // TraesCS4B02G335100 // TraesCS6B02G440200 // TraesCS2B02G181900 // TraesCS6B02G108100 // TraesCS6A02G080600 // TraesCS3D02G188200 // TraesCS7D02G223000 // TraesCS5A02G505000 // TraesCS3A02G184000 // TraesCS6A02G400000 // TraesCS3B02G213900
GO:0044723	P	single-organism carbohydrate metabolic process	15	15	6266	85761	9.2e-18	4.9e-16	// TraesCS6D02G384200 // TraesCS6D02G074300 // TraesCS3B02G213800 // TraesCS4B02G335100 // TraesCS7A02G219100 // TraesCS6B02G440200 // TraesCS2B02G181900 // TraesCS6B02G108100 // TraesCS6A02G080600 // TraesCS3D02G188200 // TraesCS7D02G223000 // TraesCS5A02G505000 // TraesCS3A02G184000 // TraesCS6A02G400000 // TraesCS3B02G213900
GO:0032787	P	monocarboxylic acid metabolic process	15	15	7305	85761	9.2e-17	4.5e-15	// TraesCS6D02G384200 // TraesCS6D02G074300 // TraesCS3B02G213800 // TraesCS4B02G335100 // TraesCS7A02G219100 // TraesCS6B02G440200 // TraesCS2B02G181900 // TraesCS6B02G108100 // TraesCS6A02G080600 // TraesCS3D02G188200 // TraesCS7D02G223000 // TraesCS5A02G505000 // TraesCS3A02G184000 // TraesCS6A02G400000 // TraesCS3B02G213900
GO:0005975	P	carbohydrate metabolic process	15	15	8137	85761	4.6e-16	2.1e-14	// TraesCS6D02G384200 // TraesCS6D02G074300 // TraesCS3B02G213800 // TraesCS4B02G335100 // TraesCS7A02G219100 // TraesCS6B02G440200 // TraesCS2B02G181900 // TraesCS6B02G108100 // TraesCS6A02G080600 // TraesCS3D02G188200 // TraesCS7D02G223000 // TraesCS5A02G505000 // TraesCS3A02G184000 // TraesCS6A02G400000 // TraesCS3B02G213900
GO:0055114	P	oxidation-reduction process	15	15	9149	85761	2.7e-15	1.1e-13	// TraesCS6D02G384200 // TraesCS6D02G074300 // TraesCS3B02G213800 // TraesCS4B02G335100 // TraesCS7A02G219100 // TraesCS6B02G440200 // TraesCS2B02G181900 // TraesCS6B02G108100 // TraesCS6A02G080600 // TraesCS3D02G188200 // TraesCS7D02G223000 // TraesCS5A02G505000 // TraesCS3A02G184000 // TraesCS6A02G400000 // TraesCS3B02G213900
GO:0019752	P	carboxylic acid metabolic process	15	15	9596	85761	5.5e-15	2.2e-13	// TraesCS6D02G384200 // TraesCS6D02G074300 // TraesCS3B02G213800 // TraesCS4B02G335100 // TraesCS7A02G219100 // TraesCS6B02G440200 // TraesCS2B02G181900 // TraesCS6B02G108100 // TraesCS6A02G080600 // TraesCS3D02G188200 // TraesCS7D02G223000 // TraesCS5A02G505000 // TraesCS3A02G184000 // TraesCS6A02G400000 // TraesCS3B02G213900
GO:0043436	P	oxoacid metabolic process	15	15	10221	85761	1.4e-14	5.3e-13	// TraesCS6D02G384200 // TraesCS6D02G074300 // TraesCS3B02G213800 // TraesCS4B02G335100 // TraesCS7A02G219100 // TraesCS6B02G440200 // TraesCS2B02G181900 // TraesCS6B02G108100 // TraesCS6A02G080600 // TraesCS3D02G188200 // TraesCS7D02G223000 // TraesCS5A02G505000 // TraesCS3A02G184000 // TraesCS6A02G400000 // TraesCS3B02G213900
GO:0006082	P	organic acid metabolic process	15	15	11065	85761	4.6e-14	1.7e-12	// TraesCS6D02G384200 // TraesCS6D02G074300 // TraesCS3B02G213800 // TraesCS4B02G335100 // TraesCS7A02G219100 // TraesCS6B02G440200 // TraesCS2B02G181900 // TraesCS6B02G108100 // TraesCS6A02G080600 // TraesCS3D02G188200 // TraesCS7D02G223000 // TraesCS5A02G505000 // TraesCS3A02G184000 // TraesCS6A02G400000 // TraesCS3B02G213900
GO:0046686	P	response to cadmium ion	11	15	3086	85761	1.6e-13	5.4e-12	// TraesCS6D02G074300 // TraesCS3B02G213800 // TraesCS7A02G219100 // TraesCS4B02G335100 // TraesCS2B02G181900 // TraesCS6B02G108100 // TraesCS6A02G080600 // TraesCS3D02G188200 // TraesCS5A02G505000 // TraesCS3A02G184000 // TraesCS3B02G213900
GO:0046031	P	ADP metabolic process	8	15	997	85761	2.1e-12	5.3e-11	// TraesCS3B02G213800 // TraesCS7A02G219100 // TraesCS4B02G335100 // TraesCS2B02G181900 // TraesCS5A02G505000 // TraesCS6A02G080600 // TraesCS6B02G108100 // TraesCS6D02G074300
GO:0009179	P	purine ribonucleoside diphosphate metabolic process	8	15	997	85761	2.1e-12	5.3e-11	// TraesCS3B02G213800 // TraesCS7A02G219100 // TraesCS4B02G335100 // TraesCS2B02G181900 // TraesCS5A02G505000 // TraesCS6A02G080600 // TraesCS6B02G108100 // TraesCS6D02G074300
GO:0006757	P	ATP generation from ADP	8	15	989	85761	1.9e-12	5.3e-11	// TraesCS3B02G213800 // TraesCS7A02G219100 // TraesCS4B02G335100 // TraesCS2B02G181900 // TraesCS5A02G505000 // TraesCS6A02G080600 // TraesCS6B02G108100 // TraesCS6D02G074300
GO:0009135	P	purine nucleoside diphosphate metabolic process	8	15	997	85761	2.1e-12	5.3e-11	// TraesCS3B02G213800 // TraesCS7A02G219100 // TraesCS4B02G335100 // TraesCS2B02G181900 // TraesCS5A02G505000 // TraesCS6A02G080600 // TraesCS6B02G108100 // TraesCS6D02G074300
GO:0009185	P	ribonucleoside diphosphate metabolic process	8	15	997	85761	2.1e-12	5.3e-11	// TraesCS3B02G213800 // TraesCS7A02G219100 // TraesCS4B02G335100 // TraesCS2B02G181900 // TraesCS5A02G505000 // TraesCS6A02G080600 // TraesCS6B02G108100 // TraesCS6D02G074300
GO:0006096	P	glycolytic process	8	15	989	85761	1.9e-12	5.3e-11	// TraesCS3B02G213800 // TraesCS7A02G219100 // TraesCS4B02G335100 // TraesCS2B02G181900 // TraesCS5A02G505000 // TraesCS6A02G080600 // TraesCS6B02G108100 // TraesCS6D02G074300
GO:0006006	P	glucose metabolic process	8	15	1010	85761	2.3e-12	5.7e-11	// TraesCS3B02G213800 // TraesCS7A02G219100 // TraesCS4B02G335100 // TraesCS2B02G181900 // TraesCS5A02G505000 // TraesCS6A02G080600 // TraesCS6B02G108100 // TraesCS6D02G074300
GO:0006165	P	nucleoside diphosphate phosphorylation	8	15	1015	85761	2.4e-12	5.7e-11	// TraesCS3B02G213800 // TraesCS7A02G219100 // TraesCS4B02G335100 // TraesCS2B02G181900 // TraesCS5A02G505000 // TraesCS6A02G080600 // TraesCS6B02G108100 // TraesCS6D02G074300
GO:0009132	P	nucleoside diphosphate metabolic process	8	15	1032	85761	2.7e-12	6.2e-11	// TraesCS3B02G213800 // TraesCS7A02G219100 // TraesCS4B02G335100 // TraesCS2B02G181900 // TraesCS5A02G505000 // TraesCS6A02G080600 // TraesCS6B02G108100 // TraesCS6D02G074300
GO:0046939	P	nucleotide phosphorylation	8	15	1060	85761	3.4e-12	7.4e-11	// TraesCS3B02G213800 // TraesCS7A02G219100 // TraesCS4B02G335100 // TraesCS2B02G181900 // TraesCS5A02G505000 // TraesCS6A02G080600 // TraesCS6B02G108100 // TraesCS6D02G074300
GO:0044281	P	small molecule metabolic process	15	15	14959	85761	4.2e-12	9.1e-11	// TraesCS6D02G384200 // TraesCS6D02G074300 // TraesCS3B02G213800 // TraesCS4B02G335100 // TraesCS7A02G219100 // TraesCS6B02G440200 // TraesCS2B02G181900 // TraesCS6B02G108100 // TraesCS6A02G080600 // TraesCS3D02G188200 // TraesCS7D02G223000 // TraesCS5A02G505000 // TraesCS3A02G184000 // TraesCS6A02G400000 // TraesCS3B02G213900
GO:0010038	P	response to metal ion	11	15	4300	85761	5.8e-12	1.2e-10	// TraesCS6D02G074300 // TraesCS3B02G213800 // TraesCS7A02G219100 // TraesCS4B02G335100 // TraesCS2B02G181900 // TraesCS6B02G108100 // TraesCS6A02G080600 // TraesCS3D02G188200 // TraesCS5A02G505000 // TraesCS3A02G184000 // TraesCS3B02G213900
GO:0019318	P	hexose metabolic process	8	15	1206	85761	9.3e-12	1.9e-10	// TraesCS3B02G213800 // TraesCS7A02G219100 // TraesCS4B02G335100 // TraesCS2B02G181900 // TraesCS5A02G505000 // TraesCS6A02G080600 // TraesCS6B02G108100 // TraesCS6D02G074300
GO:0005996	P	monosaccharide metabolic process	8	15	1400	85761	3e-11	5.9e-10	// TraesCS3B02G213800 // TraesCS7A02G219100 // TraesCS4B02G335100 // TraesCS2B02G181900 // TraesCS5A02G505000 // TraesCS6A02G080600 // TraesCS6B02G108100 // TraesCS6D02G074300
GO:0044724	P	single-organism carbohydrate catabolic process	8	15	1428	85761	3.5e-11	6.6e-10	// TraesCS3B02G213800 // TraesCS7A02G219100 // TraesCS4B02G335100 // TraesCS2B02G181900 // TraesCS5A02G505000 // TraesCS6A02G080600 // TraesCS6B02G108100 // TraesCS6D02G074300
GO:0006979	P	response to oxidative stress	11	15	5229	85761	4.7e-11	8.7e-10	// TraesCS6D02G384200 // TraesCS3B02G213800 // TraesCS4B02G335100 // TraesCS7A02G219100 // TraesCS6B02G440200 // TraesCS3D02G188200 // TraesCS5A02G505000 // TraesCS7D02G223000 // TraesCS3A02G184000 // TraesCS6A02G400000 // TraesCS3B02G213900
GO:0046034	P	ATP metabolic process	8	15	1560	85761	7e-11	1.3e-09	// TraesCS3B02G213800 // TraesCS7A02G219100 // TraesCS4B02G335100 // TraesCS2B02G181900 // TraesCS5A02G505000 // TraesCS6A02G080600 // TraesCS6B02G108100 // TraesCS6D02G074300
GO:0009205	P	purine ribonucleoside triphosphate metabolic process	8	15	1601	85761	8.6e-11	1.5e-09	// TraesCS3B02G213800 // TraesCS7A02G219100 // TraesCS4B02G335100 // TraesCS2B02G181900 // TraesCS5A02G505000 // TraesCS6A02G080600 // TraesCS6B02G108100 // TraesCS6D02G074300
GO:0009144	P	purine nucleoside triphosphate metabolic process	8	15	1603	85761	8.7e-11	1.5e-09	// TraesCS3B02G213800 // TraesCS7A02G219100 // TraesCS4B02G335100 // TraesCS2B02G181900 // TraesCS5A02G505000 // TraesCS6A02G080600 // TraesCS6B02G108100 // TraesCS6D02G074300
GO:0009199	P	ribonucleoside triphosphate metabolic process	8	15	1631	85761	1e-10	1.6e-09	// TraesCS3B02G213800 // TraesCS7A02G219100 // TraesCS4B02G335100 // TraesCS2B02G181900 // TraesCS5A02G505000 // TraesCS6A02G080600 // TraesCS6B02G108100 // TraesCS6D02G074300
GO:0046496	P	nicotinamide nucleotide metabolic process	8	15	1642	85761	1.1e-10	1.7e-09	// TraesCS3B02G213800 // TraesCS7A02G219100 // TraesCS4B02G335100 // TraesCS2B02G181900 // TraesCS5A02G505000 // TraesCS6A02G080600 // TraesCS6B02G108100 // TraesCS6D02G074300
GO:0019362	P	pyridine nucleotide metabolic process	8	15	1645	85761	1.1e-10	1.7e-09	// TraesCS3B02G213800 // TraesCS7A02G219100 // TraesCS4B02G335100 // TraesCS2B02G181900 // TraesCS5A02G505000 // TraesCS6A02G080600 // TraesCS6B02G108100 // TraesCS6D02G074300
GO:0009167	P	purine ribonucleoside monophosphate metabolic process	8	15	1658	85761	1.1e-10	1.7e-09	// TraesCS3B02G213800 // TraesCS7A02G219100 // TraesCS4B02G335100 // TraesCS2B02G181900 // TraesCS5A02G505000 // TraesCS6A02G080600 // TraesCS6B02G108100 // TraesCS6D02G074300
GO:0009141	P	nucleoside triphosphate metabolic process	8	15	1660	85761	1.1e-10	1.7e-09	// TraesCS3B02G213800 // TraesCS7A02G219100 // TraesCS4B02G335100 // TraesCS2B02G181900 // TraesCS5A02G505000 // TraesCS6A02G080600 // TraesCS6B02G108100 // TraesCS6D02G074300
GO:0009126	P	purine nucleoside monophosphate metabolic process	8	15	1658	85761	1.1e-10	1.7e-09	// TraesCS3B02G213800 // TraesCS7A02G219100 // TraesCS4B02G335100 // TraesCS2B02G181900 // TraesCS5A02G505000 // TraesCS6A02G080600 // TraesCS6B02G108100 // TraesCS6D02G074300
GO:0072524	P	pyridine-containing compound metabolic process	8	15	1669	85761	1.2e-10	1.7e-09	// TraesCS3B02G213800 // TraesCS7A02G219100 // TraesCS4B02G335100 // TraesCS2B02G181900 // TraesCS5A02G505000 // TraesCS6A02G080600 // TraesCS6B02G108100 // TraesCS6D02G074300
GO:0009161	P	ribonucleoside monophosphate metabolic process	8	15	1735	85761	1.6e-10	2.3e-09	// TraesCS3B02G213800 // TraesCS7A02G219100 // TraesCS4B02G335100 // TraesCS2B02G181900 // TraesCS5A02G505000 // TraesCS6A02G080600 // TraesCS6B02G108100 // TraesCS6D02G074300
GO:0009123	P	nucleoside monophosphate metabolic process	8	15	1753	85761	1.8e-10	2.4e-09	// TraesCS3B02G213800 // TraesCS7A02G219100 // TraesCS4B02G335100 // TraesCS2B02G181900 // TraesCS5A02G505000 // TraesCS6A02G080600 // TraesCS6B02G108100 // TraesCS6D02G074300
GO:0006090	P	pyruvate metabolic process	8	15	1770	85761	1.9e-10	2.5e-09	// TraesCS3B02G213800 // TraesCS7A02G219100 // TraesCS4B02G335100 // TraesCS2B02G181900 // TraesCS5A02G505000 // TraesCS6A02G080600 // TraesCS6B02G108100 // TraesCS6D02G074300
GO:0046128	P	purine ribonucleoside metabolic process	8	15	1778	85761	2e-10	2.6e-09	// TraesCS3B02G213800 // TraesCS7A02G219100 // TraesCS4B02G335100 // TraesCS2B02G181900 // TraesCS5A02G505000 // TraesCS6A02G080600 // TraesCS6B02G108100 // TraesCS6D02G074300
GO:0042278	P	purine nucleoside metabolic process	8	15	1791	85761	2.1e-10	2.7e-09	// TraesCS3B02G213800 // TraesCS7A02G219100 // TraesCS4B02G335100 // TraesCS2B02G181900 // TraesCS5A02G505000 // TraesCS6A02G080600 // TraesCS6B02G108100 // TraesCS6D02G074300
GO:0009119	P	ribonucleoside metabolic process	8	15	1872	85761	2.9e-10	3.7e-09	// TraesCS3B02G213800 // TraesCS7A02G219100 // TraesCS4B02G335100 // TraesCS2B02G181900 // TraesCS5A02G505000 // TraesCS6A02G080600 // TraesCS6B02G108100 // TraesCS6D02G074300
GO:0009116	P	nucleoside metabolic process	8	15	1938	85761	3.9e-10	4.8e-09	// TraesCS3B02G213800 // TraesCS7A02G219100 // TraesCS4B02G335100 // TraesCS2B02G181900 // TraesCS5A02G505000 // TraesCS6A02G080600 // TraesCS6B02G108100 // TraesCS6D02G074300
GO:0016052	P	carbohydrate catabolic process	8	15	2089	85761	7e-10	8.5e-09	// TraesCS3B02G213800 // TraesCS7A02G219100 // TraesCS4B02G335100 // TraesCS2B02G181900 // TraesCS5A02G505000 // TraesCS6A02G080600 // TraesCS6B02G108100 // TraesCS6D02G074300
GO:0006733	P	oxidoreduction coenzyme metabolic process	8	15	2341	85761	1.7e-09	2e-08	// TraesCS3B02G213800 // TraesCS7A02G219100 // TraesCS4B02G335100 // TraesCS2B02G181900 // TraesCS5A02G505000 // TraesCS6A02G080600 // TraesCS6B02G108100 // TraesCS6D02G074300
GO:0009150	P	purine ribonucleotide metabolic process	8	15	2460	85761	2.5e-09	2.9e-08	// TraesCS3B02G213800 // TraesCS7A02G219100 // TraesCS4B02G335100 // TraesCS2B02G181900 // TraesCS5A02G505000 // TraesCS6A02G080600 // TraesCS6B02G108100 // TraesCS6D02G074300
GO:0006163	P	purine nucleotide metabolic process	8	15	2558	85761	3.4e-09	3.9e-08	// TraesCS3B02G213800 // TraesCS7A02G219100 // TraesCS4B02G335100 // TraesCS2B02G181900 // TraesCS5A02G505000 // TraesCS6A02G080600 // TraesCS6B02G108100 // TraesCS6D02G074300
GO:0042221	P	response to chemical	15	15	23546	85761	3.8e-09	4.3e-08	// TraesCS6D02G384200 // TraesCS6D02G074300 // TraesCS3B02G213800 // TraesCS4B02G335100 // TraesCS7A02G219100 // TraesCS6B02G440200 // TraesCS2B02G181900 // TraesCS6B02G108100 // TraesCS6A02G080600 // TraesCS3D02G188200 // TraesCS7D02G223000 // TraesCS5A02G505000 // TraesCS3A02G184000 // TraesCS6A02G400000 // TraesCS3B02G213900
GO:0072521	P	purine-containing compound metabolic process	8	15	2693	85761	5.1e-09	5.6e-08	// TraesCS3B02G213800 // TraesCS7A02G219100 // TraesCS4B02G335100 // TraesCS2B02G181900 // TraesCS5A02G505000 // TraesCS6A02G080600 // TraesCS6B02G108100 // TraesCS6D02G074300
GO:0033993	P	response to lipid	11	15	8254	85761	6.2e-09	6.8e-08	// TraesCS6D02G384200 // TraesCS3B02G213800 // TraesCS4B02G335100 // TraesCS7A02G219100 // TraesCS6B02G440200 // TraesCS3D02G188200 // TraesCS5A02G505000 // TraesCS7D02G223000 // TraesCS3A02G184000 // TraesCS6A02G400000 // TraesCS3B02G213900
GO:0009259	P	ribonucleotide metabolic process	8	15	2909	85761	9.2e-09	9.9e-08	// TraesCS3B02G213800 // TraesCS7A02G219100 // TraesCS4B02G335100 // TraesCS2B02G181900 // TraesCS5A02G505000 // TraesCS6A02G080600 // TraesCS6B02G108100 // TraesCS6D02G074300
GO:1901657	P	glycosyl compound metabolic process	8	15	2930	85761	9.7e-09	1e-07	// TraesCS3B02G213800 // TraesCS7A02G219100 // TraesCS4B02G335100 // TraesCS2B02G181900 // TraesCS5A02G505000 // TraesCS6A02G080600 // TraesCS6B02G108100 // TraesCS6D02G074300
GO:0006732	P	coenzyme metabolic process	8	15	3094	85761	1.5e-08	1.5e-07	// TraesCS3B02G213800 // TraesCS7A02G219100 // TraesCS4B02G335100 // TraesCS2B02G181900 // TraesCS5A02G505000 // TraesCS6A02G080600 // TraesCS6B02G108100 // TraesCS6D02G074300
GO:0019693	P	ribose phosphate metabolic process	8	15	3479	85761	3.7e-08	3.8e-07	// TraesCS3B02G213800 // TraesCS7A02G219100 // TraesCS4B02G335100 // TraesCS2B02G181900 // TraesCS5A02G505000 // TraesCS6A02G080600 // TraesCS6B02G108100 // TraesCS6D02G074300
GO:0044710	P	single-organism metabolic process	15	15	27869	85761	4.8e-08	4.8e-07	// TraesCS6D02G384200 // TraesCS6D02G074300 // TraesCS3B02G213800 // TraesCS4B02G335100 // TraesCS7A02G219100 // TraesCS6B02G440200 // TraesCS2B02G181900 // TraesCS6B02G108100 // TraesCS6A02G080600 // TraesCS3D02G188200 // TraesCS7D02G223000 // TraesCS5A02G505000 // TraesCS3A02G184000 // TraesCS6A02G400000 // TraesCS3B02G213900
GO:0006094	P	gluconeogenesis	5	15	658	85761	7.7e-08	7.6e-07	// TraesCS6D02G074300 // TraesCS6A02G080600 // TraesCS2B02G181900 // TraesCS6B02G108100 // TraesCS3B02G213800
GO:0006950	P	response to stress	15	15	29274	85761	1e-07	9.7e-07	// TraesCS6D02G384200 // TraesCS6D02G074300 // TraesCS3B02G213800 // TraesCS4B02G335100 // TraesCS7A02G219100 // TraesCS6B02G440200 // TraesCS2B02G181900 // TraesCS6B02G108100 // TraesCS6A02G080600 // TraesCS3D02G188200 // TraesCS7D02G223000 // TraesCS5A02G505000 // TraesCS3A02G184000 // TraesCS6A02G400000 // TraesCS3B02G213900
GO:0019319	P	hexose biosynthetic process	5	15	720	85761	1.2e-07	1.1e-06	// TraesCS6D02G074300 // TraesCS6A02G080600 // TraesCS2B02G181900 // TraesCS6B02G108100 // TraesCS3B02G213800
GO:0010035	P	response to inorganic substance	11	15	10992	85761	1.3e-07	1.2e-06	// TraesCS6D02G074300 // TraesCS3B02G213800 // TraesCS7A02G219100 // TraesCS4B02G335100 // TraesCS2B02G181900 // TraesCS6B02G108100 // TraesCS6A02G080600 // TraesCS3D02G188200 // TraesCS5A02G505000 // TraesCS3A02G184000 // TraesCS3B02G213900
GO:0046364	P	monosaccharide biosynthetic process	5	15	729	85761	1.3e-07	1.2e-06	// TraesCS6D02G074300 // TraesCS6A02G080600 // TraesCS2B02G181900 // TraesCS6B02G108100 // TraesCS3B02G213800
GO:0009117	P	nucleotide metabolic process	8	15	4105	85761	1.3e-07	1.2e-06	// TraesCS3B02G213800 // TraesCS7A02G219100 // TraesCS4B02G335100 // TraesCS2B02G181900 // TraesCS5A02G505000 // TraesCS6A02G080600 // TraesCS6B02G108100 // TraesCS6D02G074300
GO:0006753	P	nucleoside phosphate metabolic process	8	15	4119	85761	1.4e-07	1.2e-06	// TraesCS3B02G213800 // TraesCS7A02G219100 // TraesCS4B02G335100 // TraesCS2B02G181900 // TraesCS5A02G505000 // TraesCS6A02G080600 // TraesCS6B02G108100 // TraesCS6D02G074300
GO:0051186	P	cofactor metabolic process	8	15	4166	85761	1.5e-07	1.3e-06	// TraesCS3B02G213800 // TraesCS7A02G219100 // TraesCS4B02G335100 // TraesCS2B02G181900 // TraesCS5A02G505000 // TraesCS6A02G080600 // TraesCS6B02G108100 // TraesCS6D02G074300
GO:0055086	P	nucleobase-containing small molecule metabolic process	8	15	4314	85761	1.9e-07	1.7e-06	// TraesCS3B02G213800 // TraesCS7A02G219100 // TraesCS4B02G335100 // TraesCS2B02G181900 // TraesCS5A02G505000 // TraesCS6A02G080600 // TraesCS6B02G108100 // TraesCS6D02G074300
GO:0009737	P	response to abscisic acid	9	15	6841	85761	4.2e-07	3.7e-06	// TraesCS6D02G384200 // TraesCS4B02G335100 // TraesCS6B02G440200 // TraesCS7D02G223000 // TraesCS5A02G505000 // TraesCS3D02G188200 // TraesCS3A02G184000 // TraesCS6A02G400000 // TraesCS3B02G213900
GO:0097305	P	response to alcohol	9	15	6873	85761	4.4e-07	3.8e-06	// TraesCS6D02G384200 // TraesCS4B02G335100 // TraesCS6B02G440200 // TraesCS7D02G223000 // TraesCS5A02G505000 // TraesCS3D02G188200 // TraesCS3A02G184000 // TraesCS6A02G400000 // TraesCS3B02G213900
GO:0001101	P	response to acid chemical	11	15	13354	85761	9.7e-07	8.2e-06	// TraesCS6D02G384200 // TraesCS3B02G213800 // TraesCS4B02G335100 // TraesCS7A02G219100 // TraesCS6B02G440200 // TraesCS3D02G188200 // TraesCS5A02G505000 // TraesCS7D02G223000 // TraesCS3A02G184000 // TraesCS6A02G400000 // TraesCS3B02G213900
GO:0019637	P	organophosphate metabolic process	8	15	5805	85761	1.8e-06	1.5e-05	// TraesCS3B02G213800 // TraesCS7A02G219100 // TraesCS4B02G335100 // TraesCS2B02G181900 // TraesCS5A02G505000 // TraesCS6A02G080600 // TraesCS6B02G108100 // TraesCS6D02G074300
GO:0044712	P	single-organism catabolic process	8	15	6551	85761	4.6e-06	3.8e-05	// TraesCS3B02G213800 // TraesCS7A02G219100 // TraesCS4B02G335100 // TraesCS2B02G181900 // TraesCS5A02G505000 // TraesCS6A02G080600 // TraesCS6B02G108100 // TraesCS6D02G074300
GO:0009651	P	response to salt stress	8	15	6845	85761	6.4e-06	5.2e-05	// TraesCS3B02G213800 // TraesCS7A02G219100 // TraesCS4B02G335100 // TraesCS2B02G181900 // TraesCS5A02G505000 // TraesCS6A02G080600 // TraesCS6B02G108100 // TraesCS6D02G074300
GO:0050896	P	response to stimulus	15	15	39029	85761	7.5e-06	6e-05	// TraesCS6D02G384200 // TraesCS6D02G074300 // TraesCS3B02G213800 // TraesCS4B02G335100 // TraesCS7A02G219100 // TraesCS6B02G440200 // TraesCS2B02G181900 // TraesCS6B02G108100 // TraesCS6A02G080600 // TraesCS3D02G188200 // TraesCS7D02G223000 // TraesCS5A02G505000 // TraesCS3A02G184000 // TraesCS6A02G400000 // TraesCS3B02G213900
GO:1901135	P	carbohydrate derivative metabolic process	8	15	7081	85761	8.2e-06	6.5e-05	// TraesCS3B02G213800 // TraesCS7A02G219100 // TraesCS4B02G335100 // TraesCS2B02G181900 // TraesCS5A02G505000 // TraesCS6A02G080600 // TraesCS6B02G108100 // TraesCS6D02G074300
GO:0006970	P	response to osmotic stress	8	15	7369	85761	1.1e-05	8.7e-05	// TraesCS3B02G213800 // TraesCS7A02G219100 // TraesCS4B02G335100 // TraesCS2B02G181900 // TraesCS5A02G505000 // TraesCS6A02G080600 // TraesCS6B02G108100 // TraesCS6D02G074300
GO:0044763	P	single-organism cellular process	15	15	40376	85761	1.2e-05	9.6e-05	// TraesCS6D02G384200 // TraesCS6D02G074300 // TraesCS3B02G213800 // TraesCS4B02G335100 // TraesCS7A02G219100 // TraesCS6B02G440200 // TraesCS2B02G181900 // TraesCS6B02G108100 // TraesCS6A02G080600 // TraesCS3D02G188200 // TraesCS7D02G223000 // TraesCS5A02G505000 // TraesCS3A02G184000 // TraesCS6A02G400000 // TraesCS3B02G213900
GO:1901700	P	response to oxygen-containing compound	11	15	17327	85761	1.4e-05	0.00011	// TraesCS6D02G384200 // TraesCS3B02G213800 // TraesCS4B02G335100 // TraesCS7A02G219100 // TraesCS6B02G440200 // TraesCS3D02G188200 // TraesCS5A02G505000 // TraesCS7D02G223000 // TraesCS3A02G184000 // TraesCS6A02G400000 // TraesCS3B02G213900
GO:0009725	P	response to hormone	10	15	14710	85761	2.9e-05	0.00022	// TraesCS6D02G384200 // TraesCS3B02G213800 // TraesCS4B02G335100 // TraesCS6B02G440200 // TraesCS3D02G188200 // TraesCS5A02G505000 // TraesCS7D02G223000 // TraesCS3A02G184000 // TraesCS6A02G400000 // TraesCS3B02G213900
GO:0010033	P	response to organic substance	11	15	18902	85761	3.3e-05	0.00025	// TraesCS6D02G384200 // TraesCS3B02G213800 // TraesCS4B02G335100 // TraesCS7A02G219100 // TraesCS6B02G440200 // TraesCS3D02G188200 // TraesCS5A02G505000 // TraesCS7D02G223000 // TraesCS3A02G184000 // TraesCS6A02G400000 // TraesCS3B02G213900
GO:0009719	P	response to endogenous stimulus	10	15	15578	85761	4.8e-05	0.00035	// TraesCS6D02G384200 // TraesCS3B02G213800 // TraesCS4B02G335100 // TraesCS6B02G440200 // TraesCS3D02G188200 // TraesCS5A02G505000 // TraesCS7D02G223000 // TraesCS3A02G184000 // TraesCS6A02G400000 // TraesCS3B02G213900
GO:0016310	P	phosphorylation	8	15	10031	85761	0.00011	0.00077	// TraesCS3B02G213800 // TraesCS7A02G219100 // TraesCS4B02G335100 // TraesCS2B02G181900 // TraesCS5A02G505000 // TraesCS6A02G080600 // TraesCS6B02G108100 // TraesCS6D02G074300
GO:0044238	P	primary metabolic process	15	15	47561	85761	0.00014	0.001	// TraesCS6D02G384200 // TraesCS6D02G074300 // TraesCS3B02G213800 // TraesCS4B02G335100 // TraesCS7A02G219100 // TraesCS6B02G440200 // TraesCS2B02G181900 // TraesCS6B02G108100 // TraesCS6A02G080600 // TraesCS3D02G188200 // TraesCS7D02G223000 // TraesCS5A02G505000 // TraesCS3A02G184000 // TraesCS6A02G400000 // TraesCS3B02G213900
GO:0044550	P	secondary metabolite biosynthetic process	5	15	3355	85761	0.0002	0.0014	// TraesCS6D02G074300 // TraesCS6A02G080600 // TraesCS2B02G181900 // TraesCS6B02G108100 // TraesCS3B02G213800
GO:0044237	P	cellular metabolic process	15	15	49214	85761	0.00024	0.0017	// TraesCS6D02G384200 // TraesCS6D02G074300 // TraesCS3B02G213800 // TraesCS4B02G335100 // TraesCS7A02G219100 // TraesCS6B02G440200 // TraesCS2B02G181900 // TraesCS6B02G108100 // TraesCS6A02G080600 // TraesCS3D02G188200 // TraesCS7D02G223000 // TraesCS5A02G505000 // TraesCS3A02G184000 // TraesCS6A02G400000 // TraesCS3B02G213900
GO:1901575	P	organic substance catabolic process	8	15	11403	85761	0.00026	0.0018	// TraesCS3B02G213800 // TraesCS7A02G219100 // TraesCS4B02G335100 // TraesCS2B02G181900 // TraesCS5A02G505000 // TraesCS6A02G080600 // TraesCS6B02G108100 // TraesCS6D02G074300
GO:0044699	P	single-organism process	15	15	50975	85761	0.00041	0.0028	// TraesCS6D02G384200 // TraesCS6D02G074300 // TraesCS3B02G213800 // TraesCS4B02G335100 // TraesCS7A02G219100 // TraesCS6B02G440200 // TraesCS2B02G181900 // TraesCS6B02G108100 // TraesCS6A02G080600 // TraesCS3D02G188200 // TraesCS7D02G223000 // TraesCS5A02G505000 // TraesCS3A02G184000 // TraesCS6A02G400000 // TraesCS3B02G213900
GO:0016051	P	carbohydrate biosynthetic process	5	15	4030	85761	0.00046	0.0031	// TraesCS6D02G074300 // TraesCS6A02G080600 // TraesCS2B02G181900 // TraesCS6B02G108100 // TraesCS3B02G213800
GO:0071704	P	organic substance metabolic process	15	15	51371	85761	0.00046	0.0031	// TraesCS6D02G384200 // TraesCS6D02G074300 // TraesCS3B02G213800 // TraesCS4B02G335100 // TraesCS7A02G219100 // TraesCS6B02G440200 // TraesCS2B02G181900 // TraesCS6B02G108100 // TraesCS6A02G080600 // TraesCS3D02G188200 // TraesCS7D02G223000 // TraesCS5A02G505000 // TraesCS3A02G184000 // TraesCS6A02G400000 // TraesCS3B02G213900
GO:0009056	P	catabolic process	8	15	12766	85761	0.00058	0.0039	// TraesCS3B02G213800 // TraesCS7A02G219100 // TraesCS4B02G335100 // TraesCS2B02G181900 // TraesCS5A02G505000 // TraesCS6A02G080600 // TraesCS6B02G108100 // TraesCS6D02G074300
GO:1901564	P	organonitrogen compound metabolic process	8	15	13333	85761	0.00078	0.0052	// TraesCS3B02G213800 // TraesCS7A02G219100 // TraesCS4B02G335100 // TraesCS2B02G181900 // TraesCS5A02G505000 // TraesCS6A02G080600 // TraesCS6B02G108100 // TraesCS6D02G074300
GO:0006796	P	phosphate-containing compound metabolic process	8	15	14274	85761	0.0012	0.0082	// TraesCS3B02G213800 // TraesCS7A02G219100 // TraesCS4B02G335100 // TraesCS2B02G181900 // TraesCS5A02G505000 // TraesCS6A02G080600 // TraesCS6B02G108100 // TraesCS6D02G074300
GO:0006793	P	phosphorus metabolic process	8	15	14329	85761	0.0013	0.0083	// TraesCS3B02G213800 // TraesCS7A02G219100 // TraesCS4B02G335100 // TraesCS2B02G181900 // TraesCS5A02G505000 // TraesCS6A02G080600 // TraesCS6B02G108100 // TraesCS6D02G074300
GO:0019748	P	secondary metabolic process	5	15	5410	85761	0.0018	0.011	// TraesCS6D02G074300 // TraesCS6A02G080600 // TraesCS2B02G181900 // TraesCS6B02G108100 // TraesCS3B02G213800
GO:0008152	P	metabolic process	15	15	57664	85761	0.0026	0.017	// TraesCS6D02G384200 // TraesCS6D02G074300 // TraesCS3B02G213800 // TraesCS4B02G335100 // TraesCS7A02G219100 // TraesCS6B02G440200 // TraesCS2B02G181900 // TraesCS6B02G108100 // TraesCS6A02G080600 // TraesCS3D02G188200 // TraesCS7D02G223000 // TraesCS5A02G505000 // TraesCS3A02G184000 // TraesCS6A02G400000 // TraesCS3B02G213900
GO:0016053	P	organic acid biosynthetic process	5	15	6010	85761	0.0028	0.018	// TraesCS6D02G074300 // TraesCS6A02G080600 // TraesCS2B02G181900 // TraesCS6B02G108100 // TraesCS3B02G213800
GO:0009987	P	cellular process	15	15	58786	85761	0.0035	0.022	// TraesCS6D02G384200 // TraesCS6D02G074300 // TraesCS3B02G213800 // TraesCS4B02G335100 // TraesCS7A02G219100 // TraesCS6B02G440200 // TraesCS2B02G181900 // TraesCS6B02G108100 // TraesCS6A02G080600 // TraesCS3D02G188200 // TraesCS7D02G223000 // TraesCS5A02G505000 // TraesCS3A02G184000 // TraesCS6A02G400000 // TraesCS3B02G213900
GO:0044283	P	small molecule biosynthetic process	5	15	7111	85761	0.0058	0.036	// TraesCS6D02G074300 // TraesCS6A02G080600 // TraesCS2B02G181900 // TraesCS6B02G108100 // TraesCS3B02G213800
GO:0009628	P	response to abiotic stimulus	8	15	21261	85761	0.016	0.1	// TraesCS3B02G213800 // TraesCS7A02G219100 // TraesCS4B02G335100 // TraesCS2B02G181900 // TraesCS5A02G505000 // TraesCS6A02G080600 // TraesCS6B02G108100 // TraesCS6D02G074300
GO:1901566	P	organonitrogen compound biosynthetic process	5	15	9493	85761	0.019	0.12	// TraesCS6D02G074300 // TraesCS6A02G080600 // TraesCS2B02G181900 // TraesCS6B02G108100 // TraesCS3B02G213800
GO:0006139	P	nucleobase-containing compound metabolic process	8	15	22725	85761	0.025	0.15	// TraesCS3B02G213800 // TraesCS7A02G219100 // TraesCS4B02G335100 // TraesCS2B02G181900 // TraesCS5A02G505000 // TraesCS6A02G080600 // TraesCS6B02G108100 // TraesCS6D02G074300
GO:0046483	P	heterocycle metabolic process	8	15	25227	85761	0.045	0.27	// TraesCS3B02G213800 // TraesCS7A02G219100 // TraesCS4B02G335100 // TraesCS2B02G181900 // TraesCS5A02G505000 // TraesCS6A02G080600 // TraesCS6B02G108100 // TraesCS6D02G074300
GO:0006725	P	cellular aromatic compound metabolic process	8	15	26836	85761	0.063	0.37	// TraesCS3B02G213800 // TraesCS7A02G219100 // TraesCS4B02G335100 // TraesCS2B02G181900 // TraesCS5A02G505000 // TraesCS6A02G080600 // TraesCS6B02G108100 // TraesCS6D02G074300
GO:0034641	P	cellular nitrogen compound metabolic process	8	15	27157	85761	0.067	0.39	// TraesCS3B02G213800 // TraesCS7A02G219100 // TraesCS4B02G335100 // TraesCS2B02G181900 // TraesCS5A02G505000 // TraesCS6A02G080600 // TraesCS6B02G108100 // TraesCS6D02G074300
GO:1901360	P	organic cyclic compound metabolic process	8	15	27558	85761	0.073	0.42	// TraesCS3B02G213800 // TraesCS7A02G219100 // TraesCS4B02G335100 // TraesCS2B02G181900 // TraesCS5A02G505000 // TraesCS6A02G080600 // TraesCS6B02G108100 // TraesCS6D02G074300
GO:0006807	P	nitrogen compound metabolic process	8	15	29364	85761	0.1	0.58	// TraesCS3B02G213800 // TraesCS7A02G219100 // TraesCS4B02G335100 // TraesCS2B02G181900 // TraesCS5A02G505000 // TraesCS6A02G080600 // TraesCS6B02G108100 // TraesCS6D02G074300
GO:0044711	P	single-organism biosynthetic process	5	15	16047	85761	0.13	0.76	// TraesCS6D02G074300 // TraesCS6A02G080600 // TraesCS2B02G181900 // TraesCS6B02G108100 // TraesCS3B02G213800
GO:1901576	P	organic substance biosynthetic process	6	15	31446	85761	0.49	1	// TraesCS3B02G213800 // TraesCS7A02G219100 // TraesCS2B02G181900 // TraesCS6B02G108100 // TraesCS6A02G080600 // TraesCS6D02G074300
GO:0044260	P	cellular macromolecule metabolic process	6	15	36166	85761	0.66	1	// TraesCS3B02G213800 // TraesCS7A02G219100 // TraesCS2B02G181900 // TraesCS6B02G108100 // TraesCS6A02G080600 // TraesCS6D02G074300
GO:0044249	P	cellular biosynthetic process	6	15	30853	85761	0.47	1	// TraesCS3B02G213800 // TraesCS7A02G219100 // TraesCS2B02G181900 // TraesCS6B02G108100 // TraesCS6A02G080600 // TraesCS6D02G074300
GO:0034645	P	cellular macromolecule biosynthetic process	5	15	20349	85761	0.27	1	// TraesCS6D02G074300 // TraesCS6A02G080600 // TraesCS2B02G181900 // TraesCS6B02G108100 // TraesCS3B02G213800
GO:0043170	P	macromolecule metabolic process	6	15	38931	85761	0.75	1	// TraesCS3B02G213800 // TraesCS7A02G219100 // TraesCS2B02G181900 // TraesCS6B02G108100 // TraesCS6A02G080600 // TraesCS6D02G074300
GO:0009058	P	biosynthetic process	6	15	32675	85761	0.54	1	// TraesCS3B02G213800 // TraesCS7A02G219100 // TraesCS2B02G181900 // TraesCS6B02G108100 // TraesCS6A02G080600 // TraesCS6D02G074300
GO:0009059	P	macromolecule biosynthetic process	5	15	20720	85761	0.29	1	// TraesCS6D02G074300 // TraesCS6A02G080600 // TraesCS2B02G181900 // TraesCS6B02G108100 // TraesCS3B02G213800
GO:0003994	F	aconitate hydratase activity	15	15	36	85761	4.2e-50	3.2e-48	// TraesCS6D02G384200 // TraesCS6D02G074300 // TraesCS3B02G213800 // TraesCS4B02G335100 // TraesCS7A02G219100 // TraesCS6B02G440200 // TraesCS2B02G181900 // TraesCS6B02G108100 // TraesCS6A02G080600 // TraesCS3D02G188200 // TraesCS7D02G223000 // TraesCS5A02G505000 // TraesCS3A02G184000 // TraesCS6A02G400000 // TraesCS3B02G213900
GO:0051539	F	4 iron, 4 sulfur cluster binding	15	15	226	85761	3.4e-39	1.3e-37	// TraesCS6D02G384200 // TraesCS6D02G074300 // TraesCS3B02G213800 // TraesCS4B02G335100 // TraesCS7A02G219100 // TraesCS6B02G440200 // TraesCS2B02G181900 // TraesCS6B02G108100 // TraesCS6A02G080600 // TraesCS3D02G188200 // TraesCS7D02G223000 // TraesCS5A02G505000 // TraesCS3A02G184000 // TraesCS6A02G400000 // TraesCS3B02G213900
GO:0016836	F	hydro-lyase activity	15	15	360	85761	3.1e-36	7.8e-35	// TraesCS6D02G384200 // TraesCS6D02G074300 // TraesCS3B02G213800 // TraesCS4B02G335100 // TraesCS7A02G219100 // TraesCS6B02G440200 // TraesCS2B02G181900 // TraesCS6B02G108100 // TraesCS6A02G080600 // TraesCS3D02G188200 // TraesCS7D02G223000 // TraesCS5A02G505000 // TraesCS3A02G184000 // TraesCS6A02G400000 // TraesCS3B02G213900
GO:0051536	F	iron-sulfur cluster binding	15	15	619	85761	9.1e-33	1.4e-31	// TraesCS6D02G384200 // TraesCS6D02G074300 // TraesCS3B02G213800 // TraesCS4B02G335100 // TraesCS7A02G219100 // TraesCS6B02G440200 // TraesCS2B02G181900 // TraesCS6B02G108100 // TraesCS6A02G080600 // TraesCS3D02G188200 // TraesCS7D02G223000 // TraesCS5A02G505000 // TraesCS3A02G184000 // TraesCS6A02G400000 // TraesCS3B02G213900
GO:0051540	F	metal cluster binding	15	15	619	85761	9.1e-33	1.4e-31	// TraesCS6D02G384200 // TraesCS6D02G074300 // TraesCS3B02G213800 // TraesCS4B02G335100 // TraesCS7A02G219100 // TraesCS6B02G440200 // TraesCS2B02G181900 // TraesCS6B02G108100 // TraesCS6A02G080600 // TraesCS3D02G188200 // TraesCS7D02G223000 // TraesCS5A02G505000 // TraesCS3A02G184000 // TraesCS6A02G400000 // TraesCS3B02G213900
GO:0016835	F	carbon-oxygen lyase activity	15	15	663	85761	2.5e-32	3.2e-31	// TraesCS6D02G384200 // TraesCS6D02G074300 // TraesCS3B02G213800 // TraesCS4B02G335100 // TraesCS7A02G219100 // TraesCS6B02G440200 // TraesCS2B02G181900 // TraesCS6B02G108100 // TraesCS6A02G080600 // TraesCS3D02G188200 // TraesCS7D02G223000 // TraesCS5A02G505000 // TraesCS3A02G184000 // TraesCS6A02G400000 // TraesCS3B02G213900
GO:0048027	F	mRNA 5'-UTR binding	10	15	44	85761	1.2e-29	1.3e-28	// TraesCS6D02G384200 // TraesCS4B02G335100 // TraesCS7A02G219100 // TraesCS6B02G440200 // TraesCS3D02G188200 // TraesCS5A02G505000 // TraesCS7D02G223000 // TraesCS3A02G184000 // TraesCS6A02G400000 // TraesCS3B02G213900
GO:0016829	F	lyase activity	15	15	3805	85761	5.2e-21	5e-20	// TraesCS6D02G384200 // TraesCS6D02G074300 // TraesCS3B02G213800 // TraesCS4B02G335100 // TraesCS7A02G219100 // TraesCS6B02G440200 // TraesCS2B02G181900 // TraesCS6B02G108100 // TraesCS6A02G080600 // TraesCS3D02G188200 // TraesCS7D02G223000 // TraesCS5A02G505000 // TraesCS3A02G184000 // TraesCS6A02G400000 // TraesCS3B02G213900
GO:0005507	F	copper ion binding	11	15	1291	85761	1.2e-17	1e-16	// TraesCS6D02G384200 // TraesCS3B02G213800 // TraesCS4B02G335100 // TraesCS7A02G219100 // TraesCS6B02G440200 // TraesCS3D02G188200 // TraesCS5A02G505000 // TraesCS7D02G223000 // TraesCS3A02G184000 // TraesCS6A02G400000 // TraesCS3B02G213900
GO:0044822	F	poly(A) RNA binding	10	15	978	85761	1.1e-16	7.8e-16	// TraesCS6D02G384200 // TraesCS4B02G335100 // TraesCS7A02G219100 // TraesCS6B02G440200 // TraesCS3D02G188200 // TraesCS5A02G505000 // TraesCS7D02G223000 // TraesCS3A02G184000 // TraesCS6A02G400000 // TraesCS3B02G213900
GO:0003729	F	mRNA binding	10	15	978	85761	1.1e-16	7.8e-16	// TraesCS6D02G384200 // TraesCS4B02G335100 // TraesCS7A02G219100 // TraesCS6B02G440200 // TraesCS3D02G188200 // TraesCS5A02G505000 // TraesCS7D02G223000 // TraesCS3A02G184000 // TraesCS6A02G400000 // TraesCS3B02G213900
GO:0046872	F	metal ion binding	15	15	17104	85761	3.2e-11	2e-10	// TraesCS6D02G384200 // TraesCS6D02G074300 // TraesCS3B02G213800 // TraesCS4B02G335100 // TraesCS7A02G219100 // TraesCS6B02G440200 // TraesCS2B02G181900 // TraesCS6B02G108100 // TraesCS6A02G080600 // TraesCS3D02G188200 // TraesCS7D02G223000 // TraesCS5A02G505000 // TraesCS3A02G184000 // TraesCS6A02G400000 // TraesCS3B02G213900
GO:0043169	F	cation binding	15	15	17543	85761	4.6e-11	2.7e-10	// TraesCS6D02G384200 // TraesCS6D02G074300 // TraesCS3B02G213800 // TraesCS4B02G335100 // TraesCS7A02G219100 // TraesCS6B02G440200 // TraesCS2B02G181900 // TraesCS6B02G108100 // TraesCS6A02G080600 // TraesCS3D02G188200 // TraesCS7D02G223000 // TraesCS5A02G505000 // TraesCS3A02G184000 // TraesCS6A02G400000 // TraesCS3B02G213900
GO:0043167	F	ion binding	15	15	18287	85761	8.6e-11	4.7e-10	// TraesCS6D02G384200 // TraesCS6D02G074300 // TraesCS3B02G213800 // TraesCS4B02G335100 // TraesCS7A02G219100 // TraesCS6B02G440200 // TraesCS2B02G181900 // TraesCS6B02G108100 // TraesCS6A02G080600 // TraesCS3D02G188200 // TraesCS7D02G223000 // TraesCS5A02G505000 // TraesCS3A02G184000 // TraesCS6A02G400000 // TraesCS3B02G213900
GO:0003723	F	RNA binding	10	15	4508	85761	3.8e-10	2e-09	// TraesCS6D02G384200 // TraesCS4B02G335100 // TraesCS7A02G219100 // TraesCS6B02G440200 // TraesCS3D02G188200 // TraesCS5A02G505000 // TraesCS7D02G223000 // TraesCS3A02G184000 // TraesCS6A02G400000 // TraesCS3B02G213900
GO:0046914	F	transition metal ion binding	11	15	11665	85761	2.4e-07	1.1e-06	// TraesCS6D02G384200 // TraesCS3B02G213800 // TraesCS4B02G335100 // TraesCS7A02G219100 // TraesCS6B02G440200 // TraesCS3D02G188200 // TraesCS5A02G505000 // TraesCS7D02G223000 // TraesCS3A02G184000 // TraesCS6A02G400000 // TraesCS3B02G213900
GO:0003824	F	catalytic activity	15	15	42216	85761	2.4e-05	0.00011	// TraesCS6D02G384200 // TraesCS6D02G074300 // TraesCS3B02G213800 // TraesCS4B02G335100 // TraesCS7A02G219100 // TraesCS6B02G440200 // TraesCS2B02G181900 // TraesCS6B02G108100 // TraesCS6A02G080600 // TraesCS3D02G188200 // TraesCS7D02G223000 // TraesCS5A02G505000 // TraesCS3A02G184000 // TraesCS6A02G400000 // TraesCS3B02G213900
GO:0003676	F	nucleic acid binding	10	15	16166	85761	6.7e-05	0.00028	// TraesCS6D02G384200 // TraesCS4B02G335100 // TraesCS7A02G219100 // TraesCS6B02G440200 // TraesCS3D02G188200 // TraesCS5A02G505000 // TraesCS7D02G223000 // TraesCS3A02G184000 // TraesCS6A02G400000 // TraesCS3B02G213900
GO:0005488	F	binding	15	15	58931	85761	0.0036	0.014	// TraesCS6D02G384200 // TraesCS6D02G074300 // TraesCS3B02G213800 // TraesCS4B02G335100 // TraesCS7A02G219100 // TraesCS6B02G440200 // TraesCS2B02G181900 // TraesCS6B02G108100 // TraesCS6A02G080600 // TraesCS3D02G188200 // TraesCS7D02G223000 // TraesCS5A02G505000 // TraesCS3A02G184000 // TraesCS6A02G400000 // TraesCS3B02G213900
GO:1901363	F	heterocyclic compound binding	10	15	32889	85761	0.025	0.091	// TraesCS6D02G384200 // TraesCS4B02G335100 // TraesCS7A02G219100 // TraesCS6B02G440200 // TraesCS3D02G188200 // TraesCS5A02G505000 // TraesCS7D02G223000 // TraesCS3A02G184000 // TraesCS6A02G400000 // TraesCS3B02G213900
GO:0097159	F	organic cyclic compound binding	10	15	32929	85761	0.025	0.091	// TraesCS6D02G384200 // TraesCS4B02G335100 // TraesCS7A02G219100 // TraesCS6B02G440200 // TraesCS3D02G188200 // TraesCS5A02G505000 // TraesCS7D02G223000 // TraesCS3A02G184000 // TraesCS6A02G400000 // TraesCS3B02G213900
GO:0005829	C	cytosol	11	15	10311	85761	6.5e-08	3e-06	// TraesCS6D02G384200 // TraesCS3B02G213800 // TraesCS4B02G335100 // TraesCS7A02G219100 // TraesCS6B02G440200 // TraesCS3D02G188200 // TraesCS5A02G505000 // TraesCS7D02G223000 // TraesCS3A02G184000 // TraesCS6A02G400000 // TraesCS3B02G213900
GO:0005739	C	mitochondrion	11	15	14224	85761	1.9e-06	4.2e-05	// TraesCS6D02G384200 // TraesCS3B02G213800 // TraesCS4B02G335100 // TraesCS7A02G219100 // TraesCS6B02G440200 // TraesCS3D02G188200 // TraesCS5A02G505000 // TraesCS7D02G223000 // TraesCS3A02G184000 // TraesCS6A02G400000 // TraesCS3B02G213900
GO:0044444	C	cytoplasmic part	15	15	40994	85761	1.6e-05	0.00024	// TraesCS6D02G384200 // TraesCS6D02G074300 // TraesCS3B02G213800 // TraesCS4B02G335100 // TraesCS7A02G219100 // TraesCS6B02G440200 // TraesCS2B02G181900 // TraesCS6B02G108100 // TraesCS6A02G080600 // TraesCS3D02G188200 // TraesCS7D02G223000 // TraesCS5A02G505000 // TraesCS3A02G184000 // TraesCS6A02G400000 // TraesCS3B02G213900
GO:0005737	C	cytoplasm	15	15	47682	85761	0.00015	0.0017	// TraesCS6D02G384200 // TraesCS6D02G074300 // TraesCS3B02G213800 // TraesCS4B02G335100 // TraesCS7A02G219100 // TraesCS6B02G440200 // TraesCS2B02G181900 // TraesCS6B02G108100 // TraesCS6A02G080600 // TraesCS3D02G188200 // TraesCS7D02G223000 // TraesCS5A02G505000 // TraesCS3A02G184000 // TraesCS6A02G400000 // TraesCS3B02G213900
GO:0009536	C	plastid	10	15	19432	85761	0.00034	0.0031	// TraesCS6D02G074300 // TraesCS3B02G213800 // TraesCS4B02G335100 // TraesCS2B02G181900 // TraesCS6B02G108100 // TraesCS6A02G080600 // TraesCS3D02G188200 // TraesCS5A02G505000 // TraesCS3A02G184000 // TraesCS3B02G213900
GO:0043231	C	intracellular membrane-bounded organelle	15	15	54543	85761	0.0011	0.0076	// TraesCS6D02G384200 // TraesCS6D02G074300 // TraesCS3B02G213800 // TraesCS4B02G335100 // TraesCS7A02G219100 // TraesCS6B02G440200 // TraesCS2B02G181900 // TraesCS6B02G108100 // TraesCS6A02G080600 // TraesCS3D02G188200 // TraesCS7D02G223000 // TraesCS5A02G505000 // TraesCS3A02G184000 // TraesCS6A02G400000 // TraesCS3B02G213900
GO:0043227	C	membrane-bounded organelle	15	15	54652	85761	0.0012	0.0076	// TraesCS6D02G384200 // TraesCS6D02G074300 // TraesCS3B02G213800 // TraesCS4B02G335100 // TraesCS7A02G219100 // TraesCS6B02G440200 // TraesCS2B02G181900 // TraesCS6B02G108100 // TraesCS6A02G080600 // TraesCS3D02G188200 // TraesCS7D02G223000 // TraesCS5A02G505000 // TraesCS3A02G184000 // TraesCS6A02G400000 // TraesCS3B02G213900
GO:0043229	C	intracellular organelle	15	15	55574	85761	0.0015	0.0078	// TraesCS6D02G384200 // TraesCS6D02G074300 // TraesCS3B02G213800 // TraesCS4B02G335100 // TraesCS7A02G219100 // TraesCS6B02G440200 // TraesCS2B02G181900 // TraesCS6B02G108100 // TraesCS6A02G080600 // TraesCS3D02G188200 // TraesCS7D02G223000 // TraesCS5A02G505000 // TraesCS3A02G184000 // TraesCS6A02G400000 // TraesCS3B02G213900
GO:0043226	C	organelle	15	15	55713	85761	0.0015	0.0078	// TraesCS6D02G384200 // TraesCS6D02G074300 // TraesCS3B02G213800 // TraesCS4B02G335100 // TraesCS7A02G219100 // TraesCS6B02G440200 // TraesCS2B02G181900 // TraesCS6B02G108100 // TraesCS6A02G080600 // TraesCS3D02G188200 // TraesCS7D02G223000 // TraesCS5A02G505000 // TraesCS3A02G184000 // TraesCS6A02G400000 // TraesCS3B02G213900
GO:0009507	C	chloroplast	8	15	15333	85761	0.002	0.0092	// TraesCS3B02G213800 // TraesCS2B02G181900 // TraesCS6B02G108100 // TraesCS6A02G080600 // TraesCS3D02G188200 // TraesCS6D02G074300 // TraesCS3A02G184000 // TraesCS3B02G213900
GO:0044424	C	intracellular part	15	15	60136	85761	0.0049	0.02	// TraesCS6D02G384200 // TraesCS6D02G074300 // TraesCS3B02G213800 // TraesCS4B02G335100 // TraesCS7A02G219100 // TraesCS6B02G440200 // TraesCS2B02G181900 // TraesCS6B02G108100 // TraesCS6A02G080600 // TraesCS3D02G188200 // TraesCS7D02G223000 // TraesCS5A02G505000 // TraesCS3A02G184000 // TraesCS6A02G400000 // TraesCS3B02G213900
GO:0005622	C	intracellular	15	15	60496	85761	0.0053	0.02	// TraesCS6D02G384200 // TraesCS6D02G074300 // TraesCS3B02G213800 // TraesCS4B02G335100 // TraesCS7A02G219100 // TraesCS6B02G440200 // TraesCS2B02G181900 // TraesCS6B02G108100 // TraesCS6A02G080600 // TraesCS3D02G188200 // TraesCS7D02G223000 // TraesCS5A02G505000 // TraesCS3A02G184000 // TraesCS6A02G400000 // TraesCS3B02G213900
GO:0044464	C	cell part	15	15	65148	85761	0.016	0.053	// TraesCS6D02G384200 // TraesCS6D02G074300 // TraesCS3B02G213800 // TraesCS4B02G335100 // TraesCS7A02G219100 // TraesCS6B02G440200 // TraesCS2B02G181900 // TraesCS6B02G108100 // TraesCS6A02G080600 // TraesCS3D02G188200 // TraesCS7D02G223000 // TraesCS5A02G505000 // TraesCS3A02G184000 // TraesCS6A02G400000 // TraesCS3B02G213900
GO:0005623	C	cell	15	15	65175	85761	0.016	0.053	// TraesCS6D02G384200 // TraesCS6D02G074300 // TraesCS3B02G213800 // TraesCS4B02G335100 // TraesCS7A02G219100 // TraesCS6B02G440200 // TraesCS2B02G181900 // TraesCS6B02G108100 // TraesCS6A02G080600 // TraesCS3D02G188200 // TraesCS7D02G223000 // TraesCS5A02G505000 // TraesCS3A02G184000 // TraesCS6A02G400000 // TraesCS3B02G213900

## Sheet: Table S9
Table S9. TaACO gene annotation using EggNOG database.
Gene Name	Seed ortholog	e-value	Score	GO terms	KEGG pathways	KEGG KO	eggNOG Ogs	Max_annot_lvl	Description
TaACO1	4565.Traes_2BS_27D0DFE12.1	0	967	GO:0003674,GO:0003824,GO:0005575,GO:0005622,GO:0005623,GO:0005737,GO:0006082,GO:0006790,GO:0006807,GO:0008150,GO:0008152,GO:0009058,GO:0009507,GO:0009532,GO:0009536,GO:0009570,GO:0009987,GO:0010035,GO:0010038,GO:0016143,GO:0016144,GO:0016853,GO:0016866,GO:0019748,GO:0019757,GO:0019758,GO:0019760,GO:0019761,GO:0042221,GO:0043226,GO:0043227,GO:0043229,GO:0043231,GO:0043436,GO:0044237,GO:0044249,GO:…	ko00290,ko00660,ko00966,ko01100,ko01110,ko01210,ko01230,map00290,map00660,map00966,map01100,map01110,map01210,map01230	ko:K01703	COG0065@1|root,KOG0454@2759|Eukaryota,37IEV@33090|Viridiplantae,3GC3S@35493|Streptophyta,3KM13@4447|Liliopsida,3I411@38820|Poales	35493|Streptophyta	Aconitase family (aconitate hydratase)
TaACO2	4565.Traes_3B_B6A0537FA.2	0	1959	-	ko00020,ko00630,ko00720,ko01100,ko01110,ko01120,ko01130,ko01200,ko01210,ko01230,map00020,map00630,map00720,map01100,map01110,map01120,map01130,map01200,map01210,map01230	ko:K01681	COG1048@1|root,KOG0452@2759|Eukaryota,37K7C@33090|Viridiplantae,3GEVR@35493|Streptophyta,3KSCH@4447|Liliopsida,3IEUB@38820|Poales	35493|Streptophyta	Catalyzes the isomerization of citrate to isocitrate via cis-aconitate
TaACO3	4565.Traes_3B_B6A0537FA.2	0	1331	-	ko00020,ko00630,ko00720,ko01100,ko01110,ko01120,ko01130,ko01200,ko01210,ko01230,map00020,map00630,map00720,map01100,map01110,map01120,map01130,map01200,map01210,map01230	ko:K01681	COG1048@1|root,KOG0452@2759|Eukaryota,37K7C@33090|Viridiplantae,3GEVR@35493|Streptophyta,3KSCH@4447|Liliopsida,3IEUB@38820|Poales	35493|Streptophyta	Catalyzes the isomerization of citrate to isocitrate via cis-aconitate
TaACO4	4565.Traes_3B_B6A0537FA.2	0	2012	-	ko00020,ko00630,ko00720,ko01100,ko01110,ko01120,ko01130,ko01200,ko01210,ko01230,map00020,map00630,map00720,map01100,map01110,map01120,map01130,map01200,map01210,map01230	ko:K01681	COG1048@1|root,KOG0452@2759|Eukaryota,37K7C@33090|Viridiplantae,3GEVR@35493|Streptophyta,3KSCH@4447|Liliopsida,3IEUB@38820|Poales	35493|Streptophyta	Catalyzes the isomerization of citrate to isocitrate via cis-aconitate
TaACO5	4565.Traes_3B_B6A0537FA.2	0	1970	-	ko00020,ko00630,ko00720,ko01100,ko01110,ko01120,ko01130,ko01200,ko01210,ko01230,map00020,map00630,map00720,map01100,map01110,map01120,map01130,map01200,map01210,map01230	ko:K01681	COG1048@1|root,KOG0452@2759|Eukaryota,37K7C@33090|Viridiplantae,3GEVR@35493|Streptophyta,3KSCH@4447|Liliopsida,3IEUB@38820|Poales	35493|Streptophyta	Catalyzes the isomerization of citrate to isocitrate via cis-aconitate
TaACO6	4565.Traes_5AL_5A3A592D9.1	0	1592	-	ko00020,ko00630,ko00720,ko01100,ko01110,ko01120,ko01130,ko01200,ko01210,ko01230,map00020,map00630,map00720,map01100,map01110,map01120,map01130,map01200,map01210,map01230	ko:K01681	COG1048@1|root,KOG0452@2759|Eukaryota,37K7C@33090|Viridiplantae,3GEVR@35493|Streptophyta,3KP44@4447|Liliopsida,3I3QC@38820|Poales	35493|Streptophyta	Catalyzes the isomerization of citrate to isocitrate via cis-aconitate
TaACO7	4513.MLOC_36344.1	0	1809	-	ko00020,ko00630,ko00720,ko01100,ko01110,ko01120,ko01130,ko01200,ko01210,ko01230,map00020,map00630,map00720,map01100,map01110,map01120,map01130,map01200,map01210,map01230	ko:K01681	COG1048@1|root,KOG0452@2759|Eukaryota,37K7C@33090|Viridiplantae,3GEVR@35493|Streptophyta,3KP44@4447|Liliopsida,3I3QC@38820|Poales	35493|Streptophyta	Catalyzes the isomerization of citrate to isocitrate via cis-aconitate
TaACO8	4565.Traes_2BS_27D0DFE12.1	0	956	GO:0003674,GO:0003824,GO:0005575,GO:0005622,GO:0005623,GO:0005737,GO:0006082,GO:0006790,GO:0006807,GO:0008150,GO:0008152,GO:0009058,GO:0009507,GO:0009532,GO:0009536,GO:0009570,GO:0009987,GO:0010035,GO:0010038,GO:0016143,GO:0016144,GO:0016853,GO:0016866,GO:0019748,GO:0019757,GO:0019758,GO:0019760,GO:0019761,GO:0042221,GO:0043226,GO:0043227,GO:0043229,GO:0043231,GO:0043436,GO:0044237,GO:0044249,GO:…	ko00290,ko00660,ko00966,ko01100,ko01110,ko01210,ko01230,map00290,map00660,map00966,map01100,map01110,map01210,map01230	ko:K01703	COG0065@1|root,KOG0454@2759|Eukaryota,37IEV@33090|Viridiplantae,3GC3S@35493|Streptophyta,3KM13@4447|Liliopsida,3I411@38820|Poales	35493|Streptophyta	Aconitase family (aconitate hydratase)
TaACO9	4565.Traes_6AL_28CCA7F5D.1	0	1894	-	ko00020,ko00630,ko00720,ko01100,ko01110,ko01120,ko01130,ko01200,ko01210,ko01230,map00020,map00630,map00720,map01100,map01110,map01120,map01130,map01200,map01210,map01230	ko:K01681	COG1048@1|root,KOG0452@2759|Eukaryota,37K7C@33090|Viridiplantae,3GEVR@35493|Streptophyta,3KSCH@4447|Liliopsida,3IEUB@38820|Poales	35493|Streptophyta	Catalyzes the isomerization of citrate to isocitrate via cis-aconitate
TaACO10	4565.Traes_2BS_27D0DFE12.1	1.9e-314	861	GO:0003674,GO:0003824,GO:0005575,GO:0005622,GO:0005623,GO:0005737,GO:0006082,GO:0006790,GO:0006807,GO:0008150,GO:0008152,GO:0009058,GO:0009507,GO:0009532,GO:0009536,GO:0009570,GO:0009987,GO:0010035,GO:0010038,GO:0016143,GO:0016144,GO:0016853,GO:0016866,GO:0019748,GO:0019757,GO:0019758,GO:0019760,GO:0019761,GO:0042221,GO:0043226,GO:0043227,GO:0043229,GO:0043231,GO:0043436,GO:0044237,GO:0044249,GO:…	ko00290,ko00660,ko00966,ko01100,ko01110,ko01210,ko01230,map00290,map00660,map00966,map01100,map01110,map01210,map01230	ko:K01703	COG0065@1|root,KOG0454@2759|Eukaryota,37IEV@33090|Viridiplantae,3GC3S@35493|Streptophyta,3KM13@4447|Liliopsida,3I411@38820|Poales	35493|Streptophyta	Aconitase family (aconitate hydratase)
TaACO11	4565.Traes_6AL_28CCA7F5D.1	0	1847	-	ko00020,ko00630,ko00720,ko01100,ko01110,ko01120,ko01130,ko01200,ko01210,ko01230,map00020,map00630,map00720,map01100,map01110,map01120,map01130,map01200,map01210,map01230	ko:K01681	COG1048@1|root,KOG0452@2759|Eukaryota,37K7C@33090|Viridiplantae,3GEVR@35493|Streptophyta,3KSCH@4447|Liliopsida,3IEUB@38820|Poales	35493|Streptophyta	Catalyzes the isomerization of citrate to isocitrate via cis-aconitate
TaACO12	4565.Traes_2BS_27D0DFE12.1	0	958	GO:0003674,GO:0003824,GO:0005575,GO:0005622,GO:0005623,GO:0005737,GO:0006082,GO:0006790,GO:0006807,GO:0008150,GO:0008152,GO:0009058,GO:0009507,GO:0009532,GO:0009536,GO:0009570,GO:0009987,GO:0010035,GO:0010038,GO:0016143,GO:0016144,GO:0016853,GO:0016866,GO:0019748,GO:0019757,GO:0019758,GO:0019760,GO:0019761,GO:0042221,GO:0043226,GO:0043227,GO:0043229,GO:0043231,GO:0043436,GO:0044237,GO:0044249,GO:…	ko00290,ko00660,ko00966,ko01100,ko01110,ko01210,ko01230,map00290,map00660,map00966,map01100,map01110,map01210,map01230	ko:K01703	COG0065@1|root,KOG0454@2759|Eukaryota,37IEV@33090|Viridiplantae,3GC3S@35493|Streptophyta,3KM13@4447|Liliopsida,3I411@38820|Poales	35493|Streptophyta	Aconitase family (aconitate hydratase)
TaACO13	4565.Traes_6AL_28CCA7F5D.1	0	1868	-	ko00020,ko00630,ko00720,ko01100,ko01110,ko01120,ko01130,ko01200,ko01210,ko01230,map00020,map00630,map00720,map01100,map01110,map01120,map01130,map01200,map01210,map01230	ko:K01681	COG1048@1|root,KOG0452@2759|Eukaryota,37K7C@33090|Viridiplantae,3GEVR@35493|Streptophyta,3KSCH@4447|Liliopsida,3IEUB@38820|Poales	35493|Streptophyta	Catalyzes the isomerization of citrate to isocitrate via cis-aconitate
TaACO14	4565.Traes_7AS_60F755E22.1	0	1646	-	-	-	COG1048@1|root,KOG0452@2759|Eukaryota,37K7C@33090|Viridiplantae,3GEVR@35493|Streptophyta,3KSCH@4447|Liliopsida,3IEUB@38820|Poales	35493|Streptophyta	Catalyzes the isomerization of citrate to isocitrate via cis-aconitate
TaACO15	4565.Traes_7DS_8C23DD4C2.1	0	1404	-	-	-	COG1048@1|root,KOG0452@2759|Eukaryota,37K7C@33090|Viridiplantae,3GEVR@35493|Streptophyta,3KSCH@4447|Liliopsida,3IEUB@38820|Poales	35493|Streptophyta	Catalyzes the isomerization of citrate to isocitrate via cis-aconitate

## Sheet: Table S10
Table S10: The PPI network between TaACO and other proteins in wheat
Node1	Node2	Neighborhood_on_chromosome	Gene_fusion	Phylogenetic_cooccurrence	Homology	Coexpression	Experimentally_determined_interaction	Database_annotated	Automated_textmining	Combined_score
TaACO5	Traes_1BS_770A3582E.1	0.218	0	0	0	0.433	0.658	0.632	0.326	0.955
TaACO5	Traes_2AL_B4C264AB8.1	0.218	0	0	0	0.433	0.658	0.632	0.326	0.955
TaACO5	Traes_2BL_6552196A1.1	0.218	0	0	0	0.433	0.658	0.632	0.326	0.955
TaACO5	TaACO12	0.045	0	0	0.57	0.338	0.045	0.633	0.388	0.787
TaACO5	Traes_2DL_AE61DD300.2	0.218	0	0	0	0.433	0.658	0.632	0.326	0.955
TaACO5	Traes_3B_0B9FADF42.1	0.218	0	0	0	0.433	0.658	0.632	0.326	0.955
TaACO5	TaACO7	0	0	0.48	0.977	0	0	0.94	0	0.94
TaACO5	TaACO6	0	0	0.48	0.975	0	0	0.94	0	0.94
TaACO5	Traes_3DS_0E5F1E5A4.2	0.218	0	0	0	0.433	0.658	0.632	0.326	0.955
TaACO5	Traes_5AL_1F730D0C4.3	0.22	0	0	0	0.697	0.714	0.94	0.486	0.997
TaACO5	Traes_5DL_E6D11E867.1	0.22	0	0	0	0.697	0.714	0.94	0.486	0.997
TaACO5	Traes_5BL_E3904C0B8.1	0.22	0	0	0	0.697	0.714	0.94	0.486	0.997
TaACO5	Traes_5BL_1D75C197C.1	0.22	0	0	0	0.697	0.714	0.94	0.486	0.997
TaACO6	Traes_1BS_770A3582E.1	0.218	0	0	0	0.433	0.658	0.632	0.326	0.955
TaACO6	Traes_2AL_B4C264AB8.1	0.218	0	0	0	0.433	0.658	0.632	0.326	0.955
TaACO6	Traes_2BL_6552196A1.1	0.218	0	0	0	0.433	0.658	0.632	0.326	0.955
TaACO6	TaACO12	0.045	0	0	0.572	0.338	0.045	0.633	0.388	0.787
TaACO6	Traes_2DL_AE61DD300.2	0.218	0	0	0	0.433	0.658	0.632	0.326	0.955
TaACO6	Traes_3B_0B9FADF42.1	0.218	0	0	0	0.433	0.658	0.632	0.326	0.955
TaACO6	TaACO5	0	0	0.48	0.975	0	0	0.94	0	0.94
TaACO6	Traes_3DS_0E5F1E5A4.2	0.218	0	0	0	0.433	0.658	0.632	0.326	0.955
TaACO6	Traes_5AL_1F730D0C4.3	0.22	0	0	0	0.697	0.714	0.963	0.626	0.998
TaACO6	TaACO15	0	0	0.48	0.972	0	0	0.94	0	0.94
TaACO6	TaACO14	0	0	0.48	0.975	0	0	0.94	0	0.94
TaACO6	TaACO13	0	0	0.48	0.983	0	0	0.94	0	0.94
TaACO6	Traes_5BL_1D75C197C.1	0.22	0	0	0	0.697	0.714	0.963	0.626	0.998
TaACO6	Traes_5BL_E3904C0B8.1	0.22	0	0	0	0.697	0.714	0.963	0.626	0.998
TaACO6	Traes_5DL_E6D11E867.1	0.22	0	0	0	0.697	0.714	0.963	0.626	0.998
TaACO7	Traes_1BS_770A3582E.1	0.218	0	0	0	0.433	0.658	0.632	0.326	0.955
TaACO7	Traes_2AL_B4C264AB8.1	0.218	0	0	0	0.433	0.658	0.632	0.383	0.959
TaACO7	Traes_2BL_6552196A1.1	0.218	0	0	0	0.433	0.658	0.632	0.383	0.959
TaACO7	TaACO12	0.045	0	0	0.573	0.338	0.045	0.633	0.388	0.787
TaACO7	Traes_2DL_AE61DD300.2	0.218	0	0	0	0.433	0.658	0.632	0.326	0.955
TaACO7	Traes_3B_0B9FADF42.1	0.218	0	0	0	0.433	0.658	0.632	0.326	0.955
TaACO7	TaACO5	0	0	0.48	0.977	0	0	0.94	0	0.94
TaACO7	Traes_3DS_0E5F1E5A4.2	0.218	0	0	0	0.433	0.658	0.632	0.326	0.955
TaACO7	TaACO15	0	0	0.48	0.974	0	0	0.94	0	0.94
TaACO7	TaACO13	0	0	0.48	0.984	0	0	0.94	0	0.94
TaACO7	TaACO14	0	0	0.48	0.977	0	0	0.94	0	0.94
TaACO7	Traes_5BL_1D75C197C.1	0.22	0	0	0	0.697	0.714	0.963	0.677	0.999
TaACO7	Traes_5BL_E3904C0B8.1	0.22	0	0	0	0.697	0.714	0.963	0.677	0.999
TaACO7	Traes_5AL_1F730D0C4.3	0.22	0	0	0	0.697	0.714	0.963	0.677	0.999
TaACO7	Traes_5DL_E6D11E867.1	0.22	0	0	0	0.697	0.714	0.963	0.677	0.999
TaACO12	Traes_1BS_770A3582E.1	0.22	0	0.343	0	0.821	0.711	0.948	0.699	0.999
TaACO12	Traes_2AL_B4C264AB8.1	0.22	0	0.392	0	0.821	0.711	0.948	0.699	0.999
TaACO12	Traes_2BL_6552196A1.1	0.22	0	0.393	0	0.821	0.711	0.948	0.699	0.999
TaACO12	TaACO7	0.045	0	0	0.573	0.338	0.045	0.633	0.388	0.787
TaACO12	TaACO13	0.045	0	0	0.574	0.338	0.045	0.633	0.388	0.787
TaACO12	TaACO14	0.045	0	0	0.579	0.338	0.045	0.633	0.388	0.787
TaACO12	TaACO5	0.045	0	0	0.57	0.338	0.045	0.633	0.388	0.787
TaACO12	TaACO6	0.045	0	0	0.572	0.338	0.045	0.633	0.388	0.787
TaACO12	TaACO15	0.045	0	0	0.558	0.338	0.045	0.633	0.388	0.788
TaACO12	Traes_5DL_E6D11E867.1	0.222	0	0	0	0	0	0.634	0.39	0.811
TaACO12	Traes_5AL_1F730D0C4.3	0.222	0	0	0	0	0	0.634	0.39	0.811
TaACO12	Traes_5BL_1D75C197C.1	0.222	0	0	0	0	0	0.634	0.39	0.811
TaACO12	Traes_5BL_E3904C0B8.1	0.222	0	0	0	0	0	0.634	0.39	0.811
TaACO12	Traes_3B_0B9FADF42.1	0.22	0	0.413	0	0.821	0.711	0.948	0.699	0.999
TaACO12	Traes_2DL_AE61DD300.2	0.22	0	0.265	0	0.821	0.711	0.948	0.699	0.999
TaACO12	Traes_3DS_0E5F1E5A4.2	0.22	0	0.415	0	0.821	0.711	0.948	0.699	0.999
TaACO13	Traes_1BS_770A3582E.1	0.218	0	0	0	0.433	0.658	0.632	0.326	0.955
TaACO13	Traes_2AL_B4C264AB8.1	0.218	0	0	0	0.433	0.658	0.632	0.383	0.959
TaACO13	Traes_2BL_6552196A1.1	0.218	0	0	0	0.433	0.658	0.632	0.383	0.959
TaACO13	TaACO12	0.045	0	0	0.574	0.338	0.045	0.633	0.388	0.787
TaACO13	Traes_2DL_AE61DD300.2	0.218	0	0	0	0.433	0.658	0.632	0.326	0.955
TaACO13	Traes_3B_0B9FADF42.1	0.218	0	0	0	0.433	0.658	0.632	0.326	0.955
TaACO13	Traes_3DS_0E5F1E5A4.2	0.218	0	0	0	0.433	0.658	0.632	0.326	0.955
TaACO13	TaACO7	0	0	0.48	0.984	0	0	0.94	0	0.94
TaACO13	Traes_5AL_1F730D0C4.3	0.22	0	0	0	0.697	0.714	0.94	0.557	0.997
TaACO13	TaACO6	0	0	0.48	0.983	0	0	0.94	0	0.94
TaACO13	Traes_5BL_1D75C197C.1	0.22	0	0	0	0.697	0.714	0.94	0.557	0.997
TaACO13	Traes_5BL_E3904C0B8.1	0.22	0	0	0	0.697	0.714	0.94	0.557	0.997
TaACO13	Traes_5DL_E6D11E867.1	0.22	0	0	0	0.697	0.714	0.94	0.557	0.997
TaACO14	Traes_1BS_770A3582E.1	0.218	0	0	0	0.433	0.658	0.632	0.326	0.955
TaACO14	Traes_2AL_B4C264AB8.1	0.218	0	0	0	0.433	0.658	0.632	0.383	0.959
TaACO14	Traes_2BL_6552196A1.1	0.218	0	0	0	0.433	0.658	0.632	0.383	0.959
TaACO14	TaACO12	0.045	0	0	0.579	0.338	0.045	0.633	0.388	0.787
TaACO14	Traes_2DL_AE61DD300.2	0.218	0	0	0	0.433	0.658	0.632	0.326	0.955
TaACO14	Traes_3B_0B9FADF42.1	0.218	0	0	0	0.433	0.658	0.632	0.326	0.955
TaACO14	Traes_3DS_0E5F1E5A4.2	0.218	0	0	0	0.433	0.658	0.632	0.326	0.955
TaACO14	TaACO7	0	0	0.48	0.977	0	0	0.94	0	0.94
TaACO14	Traes_5AL_1F730D0C4.3	0.22	0	0	0	0.697	0.714	0.94	0.557	0.997
TaACO14	TaACO6	0	0	0.48	0.975	0	0	0.94	0	0.94
TaACO14	Traes_5BL_1D75C197C.1	0.22	0	0	0	0.697	0.714	0.94	0.557	0.997
TaACO14	Traes_5BL_E3904C0B8.1	0.22	0	0	0	0.697	0.714	0.94	0.557	0.997
TaACO14	Traes_5DL_E6D11E867.1	0.22	0	0	0	0.697	0.714	0.94	0.557	0.997
TaACO15	Traes_1BS_770A3582E.1	0.218	0	0	0	0.433	0.658	0.632	0.326	0.955
TaACO15	Traes_2AL_B4C264AB8.1	0.218	0	0	0	0.433	0.658	0.632	0.383	0.959
TaACO15	Traes_2BL_6552196A1.1	0.218	0	0	0	0.433	0.658	0.632	0.383	0.959
TaACO15	TaACO12	0.045	0	0	0.558	0.338	0.045	0.633	0.388	0.788
TaACO15	Traes_2DL_AE61DD300.2	0.218	0	0	0	0.433	0.658	0.632	0.326	0.955
TaACO15	Traes_3B_0B9FADF42.1	0.218	0	0	0	0.433	0.658	0.632	0.326	0.955
TaACO15	Traes_3DS_0E5F1E5A4.2	0.218	0	0	0	0.433	0.658	0.632	0.326	0.955
TaACO15	TaACO7	0	0	0.48	0.974	0	0	0.94	0	0.94
TaACO15	Traes_5AL_1F730D0C4.3	0.22	0	0	0	0.697	0.714	0.94	0.557	0.997
TaACO15	TaACO6	0	0	0.48	0.972	0	0	0.94	0	0.94
TaACO15	Traes_5BL_1D75C197C.1	0.22	0	0	0	0.697	0.714	0.94	0.557	0.997
TaACO15	Traes_5BL_E3904C0B8.1	0.22	0	0	0	0.697	0.714	0.94	0.557	0.997
TaACO15	Traes_5DL_E6D11E867.1	0.22	0	0	0	0.697	0.714	0.94	0.557	0.997
Traes_1BS_770A3582E.1	TaACO6	0.218	0	0	0	0.433	0.658	0.632	0.326	0.955
Traes_1BS_770A3582E.1	TaACO15	0.218	0	0	0	0.433	0.658	0.632	0.326	0.955
Traes_1BS_770A3582E.1	TaACO5	0.218	0	0	0	0.433	0.658	0.632	0.326	0.955
Traes_1BS_770A3582E.1	TaACO14	0.218	0	0	0	0.433	0.658	0.632	0.326	0.955
Traes_1BS_770A3582E.1	TaACO13	0.218	0	0	0	0.433	0.658	0.632	0.326	0.955
Traes_1BS_770A3582E.1	TaACO7	0.218	0	0	0	0.433	0.658	0.632	0.326	0.955
Traes_1BS_770A3582E.1	Traes_5BL_1D75C197C.1	0.22	0	0	0	0.593	0.715	0.633	0.373	0.975
Traes_1BS_770A3582E.1	Traes_5BL_E3904C0B8.1	0.22	0	0	0	0.593	0.715	0.633	0.373	0.975
Traes_1BS_770A3582E.1	Traes_5DL_E6D11E867.1	0.22	0	0	0	0.593	0.715	0.633	0.373	0.975
Traes_1BS_770A3582E.1	Traes_5AL_1F730D0C4.3	0.22	0	0	0	0.593	0.715	0.633	0.373	0.975
Traes_1BS_770A3582E.1	TaACO12	0.22	0	0.343	0	0.821	0.711	0.948	0.699	0.999
Traes_2AL_B4C264AB8.1	TaACO5	0.218	0	0	0	0.433	0.658	0.632	0.326	0.955
Traes_2AL_B4C264AB8.1	TaACO6	0.218	0	0	0	0.433	0.658	0.632	0.326	0.955
Traes_2AL_B4C264AB8.1	TaACO13	0.218	0	0	0	0.433	0.658	0.632	0.383	0.959
Traes_2AL_B4C264AB8.1	TaACO14	0.218	0	0	0	0.433	0.658	0.632	0.383	0.959
Traes_2AL_B4C264AB8.1	TaACO7	0.218	0	0	0	0.433	0.658	0.632	0.383	0.959
Traes_2AL_B4C264AB8.1	TaACO15	0.218	0	0	0	0.433	0.658	0.632	0.383	0.959
Traes_2AL_B4C264AB8.1	Traes_5BL_E3904C0B8.1	0.22	0	0	0	0.593	0.715	0.633	0.373	0.975
Traes_2AL_B4C264AB8.1	Traes_5AL_1F730D0C4.3	0.22	0	0	0	0.593	0.715	0.633	0.373	0.975
Traes_2AL_B4C264AB8.1	Traes_5DL_E6D11E867.1	0.22	0	0	0	0.593	0.715	0.633	0.373	0.975
Traes_2AL_B4C264AB8.1	Traes_5BL_1D75C197C.1	0.22	0	0	0	0.593	0.715	0.633	0.373	0.975
Traes_2AL_B4C264AB8.1	TaACO12	0.22	0	0.392	0	0.821	0.711	0.948	0.699	0.999
Traes_2BL_6552196A1.1	TaACO5	0.218	0	0	0	0.433	0.658	0.632	0.326	0.955
Traes_2BL_6552196A1.1	TaACO6	0.218	0	0	0	0.433	0.658	0.632	0.326	0.955
Traes_2BL_6552196A1.1	TaACO13	0.218	0	0	0	0.433	0.658	0.632	0.383	0.959
Traes_2BL_6552196A1.1	TaACO14	0.218	0	0	0	0.433	0.658	0.632	0.383	0.959
Traes_2BL_6552196A1.1	TaACO7	0.218	0	0	0	0.433	0.658	0.632	0.383	0.959
Traes_2BL_6552196A1.1	TaACO15	0.218	0	0	0	0.433	0.658	0.632	0.383	0.959
Traes_2BL_6552196A1.1	Traes_5BL_E3904C0B8.1	0.22	0	0	0	0.593	0.715	0.633	0.373	0.975
Traes_2BL_6552196A1.1	Traes_5AL_1F730D0C4.3	0.22	0	0	0	0.593	0.715	0.633	0.373	0.975
Traes_2BL_6552196A1.1	Traes_5DL_E6D11E867.1	0.22	0	0	0	0.593	0.715	0.633	0.373	0.975
Traes_2BL_6552196A1.1	Traes_5BL_1D75C197C.1	0.22	0	0	0	0.593	0.715	0.633	0.373	0.975
Traes_2BL_6552196A1.1	TaACO12	0.22	0	0.393	0	0.821	0.711	0.948	0.699	0.999
Traes_2DL_AE61DD300.2	TaACO12	0.22	0	0.265	0	0.821	0.711	0.948	0.699	0.999
Traes_2DL_AE61DD300.2	TaACO5	0.218	0	0	0	0.433	0.658	0.632	0.326	0.955
Traes_2DL_AE61DD300.2	TaACO13	0.218	0	0	0	0.433	0.658	0.632	0.326	0.955
Traes_2DL_AE61DD300.2	TaACO14	0.218	0	0	0	0.433	0.658	0.632	0.326	0.955
Traes_2DL_AE61DD300.2	TaACO7	0.218	0	0	0	0.433	0.658	0.632	0.326	0.955
Traes_2DL_AE61DD300.2	TaACO15	0.218	0	0	0	0.433	0.658	0.632	0.326	0.955
Traes_2DL_AE61DD300.2	TaACO6	0.218	0	0	0	0.433	0.658	0.632	0.326	0.955
Traes_2DL_AE61DD300.2	Traes_5BL_E3904C0B8.1	0.22	0	0	0	0.593	0.715	0.633	0.373	0.975
Traes_2DL_AE61DD300.2	Traes_5DL_E6D11E867.1	0.22	0	0	0	0.593	0.715	0.633	0.373	0.975
Traes_2DL_AE61DD300.2	Traes_5AL_1F730D0C4.3	0.22	0	0	0	0.593	0.715	0.633	0.373	0.975
Traes_2DL_AE61DD300.2	Traes_5BL_1D75C197C.1	0.22	0	0	0	0.593	0.715	0.633	0.373	0.975
Traes_3B_0B9FADF42.1	TaACO12	0.22	0	0.413	0	0.821	0.711	0.948	0.699	0.999
Traes_3B_0B9FADF42.1	TaACO15	0.218	0	0	0	0.433	0.658	0.632	0.326	0.955
Traes_3B_0B9FADF42.1	TaACO6	0.218	0	0	0	0.433	0.658	0.632	0.326	0.955
Traes_3B_0B9FADF42.1	TaACO7	0.218	0	0	0	0.433	0.658	0.632	0.326	0.955
Traes_3B_0B9FADF42.1	TaACO13	0.218	0	0	0	0.433	0.658	0.632	0.326	0.955
Traes_3B_0B9FADF42.1	TaACO14	0.218	0	0	0	0.433	0.658	0.632	0.326	0.955
Traes_3B_0B9FADF42.1	TaACO5	0.218	0	0	0	0.433	0.658	0.632	0.326	0.955
Traes_3B_0B9FADF42.1	Traes_5BL_1D75C197C.1	0.22	0	0	0	0.593	0.715	0.633	0.373	0.975
Traes_3B_0B9FADF42.1	Traes_5AL_1F730D0C4.3	0.22	0	0	0	0.593	0.715	0.633	0.373	0.975
Traes_3B_0B9FADF42.1	Traes_5DL_E6D11E867.1	0.22	0	0	0	0.593	0.715	0.633	0.373	0.975
Traes_3B_0B9FADF42.1	Traes_5BL_E3904C0B8.1	0.22	0	0	0	0.593	0.715	0.633	0.373	0.975
Traes_3DS_0E5F1E5A4.2	TaACO12	0.22	0	0.415	0	0.821	0.711	0.948	0.699	0.999
Traes_3DS_0E5F1E5A4.2	TaACO5	0.218	0	0	0	0.433	0.658	0.632	0.326	0.955
Traes_3DS_0E5F1E5A4.2	TaACO15	0.218	0	0	0	0.433	0.658	0.632	0.326	0.955
Traes_3DS_0E5F1E5A4.2	TaACO6	0.218	0	0	0	0.433	0.658	0.632	0.326	0.955
Traes_3DS_0E5F1E5A4.2	TaACO7	0.218	0	0	0	0.433	0.658	0.632	0.326	0.955
Traes_3DS_0E5F1E5A4.2	TaACO14	0.218	0	0	0	0.433	0.658	0.632	0.326	0.955
Traes_3DS_0E5F1E5A4.2	TaACO13	0.218	0	0	0	0.433	0.658	0.632	0.326	0.955
Traes_3DS_0E5F1E5A4.2	Traes_5BL_1D75C197C.1	0.22	0	0	0	0.593	0.715	0.633	0.373	0.975
Traes_3DS_0E5F1E5A4.2	Traes_5DL_E6D11E867.1	0.22	0	0	0	0.593	0.715	0.633	0.373	0.975
Traes_3DS_0E5F1E5A4.2	Traes_5AL_1F730D0C4.3	0.22	0	0	0	0.593	0.715	0.633	0.373	0.975
Traes_3DS_0E5F1E5A4.2	Traes_5BL_E3904C0B8.1	0.22	0	0	0	0.593	0.715	0.633	0.373	0.975
Traes_5AL_1F730D0C4.3	Traes_1BS_770A3582E.1	0.22	0	0	0	0.593	0.715	0.633	0.373	0.975
Traes_5AL_1F730D0C4.3	Traes_2AL_B4C264AB8.1	0.22	0	0	0	0.593	0.715	0.633	0.373	0.975
Traes_5AL_1F730D0C4.3	Traes_2BL_6552196A1.1	0.22	0	0	0	0.593	0.715	0.633	0.373	0.975
Traes_5AL_1F730D0C4.3	TaACO12	0.222	0	0	0	0	0	0.634	0.39	0.811
Traes_5AL_1F730D0C4.3	Traes_2DL_AE61DD300.2	0.22	0	0	0	0.593	0.715	0.633	0.373	0.975
Traes_5AL_1F730D0C4.3	Traes_3B_0B9FADF42.1	0.22	0	0	0	0.593	0.715	0.633	0.373	0.975
Traes_5AL_1F730D0C4.3	TaACO5	0.22	0	0	0	0.697	0.714	0.94	0.486	0.997
Traes_5AL_1F730D0C4.3	Traes_3DS_0E5F1E5A4.2	0.22	0	0	0	0.593	0.715	0.633	0.373	0.975
Traes_5AL_1F730D0C4.3	TaACO7	0.22	0	0	0	0.697	0.714	0.963	0.677	0.999
Traes_5AL_1F730D0C4.3	TaACO15	0.22	0	0	0	0.697	0.714	0.94	0.557	0.997
Traes_5AL_1F730D0C4.3	TaACO13	0.22	0	0	0	0.697	0.714	0.94	0.557	0.997
Traes_5AL_1F730D0C4.3	TaACO14	0.22	0	0	0	0.697	0.714	0.94	0.557	0.997
Traes_5AL_1F730D0C4.3	TaACO6	0.22	0	0	0	0.697	0.714	0.963	0.626	0.998
Traes_5BL_1D75C197C.1	Traes_1BS_770A3582E.1	0.22	0	0	0	0.593	0.715	0.633	0.373	0.975
Traes_5BL_1D75C197C.1	Traes_2AL_B4C264AB8.1	0.22	0	0	0	0.593	0.715	0.633	0.373	0.975
Traes_5BL_1D75C197C.1	Traes_2BL_6552196A1.1	0.22	0	0	0	0.593	0.715	0.633	0.373	0.975
Traes_5BL_1D75C197C.1	TaACO12	0.222	0	0	0	0	0	0.634	0.39	0.811
Traes_5BL_1D75C197C.1	Traes_2DL_AE61DD300.2	0.22	0	0	0	0.593	0.715	0.633	0.373	0.975
Traes_5BL_1D75C197C.1	Traes_3B_0B9FADF42.1	0.22	0	0	0	0.593	0.715	0.633	0.373	0.975
Traes_5BL_1D75C197C.1	TaACO5	0.22	0	0	0	0.697	0.714	0.94	0.486	0.997
Traes_5BL_1D75C197C.1	Traes_3DS_0E5F1E5A4.2	0.22	0	0	0	0.593	0.715	0.633	0.373	0.975
Traes_5BL_1D75C197C.1	TaACO7	0.22	0	0	0	0.697	0.714	0.963	0.677	0.999
Traes_5BL_1D75C197C.1	TaACO6	0.22	0	0	0	0.697	0.714	0.963	0.626	0.998
Traes_5BL_1D75C197C.1	Traes_5BL_E3904C0B8.1	0	0	0.479	0	0	0	0	0	0.479
Traes_5BL_1D75C197C.1	TaACO15	0.22	0	0	0	0.697	0.714	0.94	0.557	0.997
Traes_5BL_1D75C197C.1	TaACO14	0.22	0	0	0	0.697	0.714	0.94	0.557	0.997
Traes_5BL_1D75C197C.1	TaACO13	0.22	0	0	0	0.697	0.714	0.94	0.557	0.997
Traes_5BL_E3904C0B8.1	Traes_1BS_770A3582E.1	0.22	0	0	0	0.593	0.715	0.633	0.373	0.975
Traes_5BL_E3904C0B8.1	Traes_2AL_B4C264AB8.1	0.22	0	0	0	0.593	0.715	0.633	0.373	0.975
Traes_5BL_E3904C0B8.1	Traes_2BL_6552196A1.1	0.22	0	0	0	0.593	0.715	0.633	0.373	0.975
Traes_5BL_E3904C0B8.1	TaACO12	0.222	0	0	0	0	0	0.634	0.39	0.811
Traes_5BL_E3904C0B8.1	Traes_2DL_AE61DD300.2	0.22	0	0	0	0.593	0.715	0.633	0.373	0.975
Traes_5BL_E3904C0B8.1	Traes_3B_0B9FADF42.1	0.22	0	0	0	0.593	0.715	0.633	0.373	0.975
Traes_5BL_E3904C0B8.1	TaACO5	0.22	0	0	0	0.697	0.714	0.94	0.486	0.997
Traes_5BL_E3904C0B8.1	Traes_3DS_0E5F1E5A4.2	0.22	0	0	0	0.593	0.715	0.633	0.373	0.975
Traes_5BL_E3904C0B8.1	TaACO7	0.22	0	0	0	0.697	0.714	0.963	0.677	0.999
Traes_5BL_E3904C0B8.1	TaACO6	0.22	0	0	0	0.697	0.714	0.963	0.626	0.998
Traes_5BL_E3904C0B8.1	Traes_5BL_1D75C197C.1	0	0	0.479	0	0	0	0	0	0.479
Traes_5BL_E3904C0B8.1	TaACO14	0.22	0	0	0	0.697	0.714	0.94	0.557	0.997
Traes_5BL_E3904C0B8.1	TaACO13	0.22	0	0	0	0.697	0.714	0.94	0.557	0.997
Traes_5BL_E3904C0B8.1	TaACO15	0.22	0	0	0	0.697	0.714	0.94	0.557	0.997
Traes_5DL_E6D11E867.1	Traes_1BS_770A3582E.1	0.22	0	0	0	0.593	0.715	0.633	0.373	0.975
Traes_5DL_E6D11E867.1	Traes_2AL_B4C264AB8.1	0.22	0	0	0	0.593	0.715	0.633	0.373	0.975
Traes_5DL_E6D11E867.1	Traes_2BL_6552196A1.1	0.22	0	0	0	0.593	0.715	0.633	0.373	0.975
Traes_5DL_E6D11E867.1	TaACO12	0.222	0	0	0	0	0	0.634	0.39	0.811
Traes_5DL_E6D11E867.1	Traes_2DL_AE61DD300.2	0.22	0	0	0	0.593	0.715	0.633	0.373	0.975
Traes_5DL_E6D11E867.1	Traes_3B_0B9FADF42.1	0.22	0	0	0	0.593	0.715	0.633	0.373	0.975
Traes_5DL_E6D11E867.1	TaACO5	0.22	0	0	0	0.697	0.714	0.94	0.486	0.997
Traes_5DL_E6D11E867.1	Traes_3DS_0E5F1E5A4.2	0.22	0	0	0	0.593	0.715	0.633	0.373	0.975
Traes_5DL_E6D11E867.1	TaACO7	0.22	0	0	0	0.697	0.714	0.963	0.677	0.999
Traes_5DL_E6D11E867.1	TaACO6	0.22	0	0	0	0.697	0.714	0.963	0.626	0.998
Traes_5DL_E6D11E867.1	TaACO13	0.22	0	0	0	0.697	0.714	0.94	0.557	0.997
Traes_5DL_E6D11E867.1	TaACO14	0.22	0	0	0	0.697	0.714	0.94	0.557	0.997
Traes_5DL_E6D11E867.1	TaACO15	0.22	0	0	0	0.697	0.714	0.94	0.557	0.997

[truncated: 1 more sheets: Table S11]
